# Supplementary material for: Stereoselective synthesis of 1,3,5-trienes from alkynones and allyl carbonyl compounds through C–C σ-bond cleavage under transition-metal-free conditions
Source: Royal Society of Chemistry journal article supplement (doi:10.1039/d2qo00617k), 2022-01-01
Supplement: d2qo00617k1.pdf [file d2qo00617k1.pdf]

Supplementary Information

**Stereoselective Synthesis of 1,3,5-Trienes from Alkynones and Allyl Carbonyl Compounds Through C-C  $\sigma$ -Bond Cleavage under Transition-Metal-Free Conditions**

Lu Cheng,<sup>†</sup> Mengdan, Wang,<sup>†</sup> Yajie Yang,<sup>†</sup> Zongkang Wang,<sup>†</sup> Yilin Zhu,<sup>†</sup> Lingkai Kong,<sup>\*‡</sup> Yanzhong Li<sup>\*†</sup>

<sup>†</sup>School of Chemistry and Molecular Engineering, East China Normal University, 500 Dongchuan Road, Shanghai, 200241, China

<sup>‡</sup>School of Chemistry and Chemical Engineering, Linyi University, Shuangling Road, Linyi, Shandong, 276000, China

*Fax: (+86) 021-54340096, E-mail: yzli@chem.ecnu.edu.cn*

## Table of contents

|                                                                     |    |
|---------------------------------------------------------------------|----|
| 1. General information .....                                        | 3  |
| 2. Synthesis of substrates .....                                    | 4  |
| 2.1 Synthesis of Acetyenic Ketones <b>1</b> .....                   | 4  |
| 2.2 Synthesis of allyl ketones <b>2</b> .....                       | 4  |
| 4. Experimental Section .....                                       | 6  |
| 4.1 General procedure for the synthesis of trienes <b>3</b> .....   | 6  |
| 4.2 General procedure for the synthesis of chromones <b>5</b> ..... | 6  |
| 4.3 Characterization data of products .....                         | 7  |
| 4.4 Further transformations of <b>3y</b> .....                      | 21 |
| 4.5 Synthesis of <b>10</b> .....                                    | 23 |
| 4.6 Synthesis of <b>3y'</b> .....                                   | 24 |
| 5. References .....                                                 | 25 |
| 6. Copies of NMR spectra .....                                      | 27 |
| 7. 1.0 mmol scale reactions for the preparation of <b>3a</b> .....  | 69 |
| 8. X-Ray Crystal Structure of <b>3l</b> (CCDC: 2156724) .....       | 70 |
| 8. X-Ray Crystal Structure of <b>3y'</b> (CCDC: 2119670) .....      | 72 |
| 9. X-Ray Crystal Structure of <b>10</b> (CCDC: 2122766) .....       | 73 |

## 1. General information

Unless otherwise stated, all experiments were carried out under the atmosphere of nitrogen gas. Visualization of spots on TLC plate was accomplished with UV light (254 nm). All commercial reagents were used without further purification. Reactions were monitored by thin layer chromatography. Purification of reaction products was carried out by flash chromatography on silica gel (200~300 mesh). NMR spectra were recorded on Bruker AV-500 or Bruker AV-600 NMR spectrometer.  $^1\text{H}$  NMR spectra was recorded with tetramethylsilane ( $\delta = 0.00$  ppm) as internal reference;  $^{13}\text{C}$  NMR spectra was recorded with  $\text{CDCl}_3$  ( $\delta = 77.00$  ppm) as internal reference. The following abbreviations (or combinations thereof) were used to explain multiplicities: s = singlet, d = doublet, m = multiplet. High-resolution mass spectra were performed on a mass spectrometer with a TOF (for EI or ESI) or FTICR (for MALDI) analyzer. Single crystal X-ray diffraction data was collected in Bruker SMARTAPEX diffractometers.

## 2. Synthesis of substrates

### 2.1 Synthesis of Acetyenic Ketones 1

All the substrates **1** are known compounds and have been prepared according to methods reported in the previous literature.

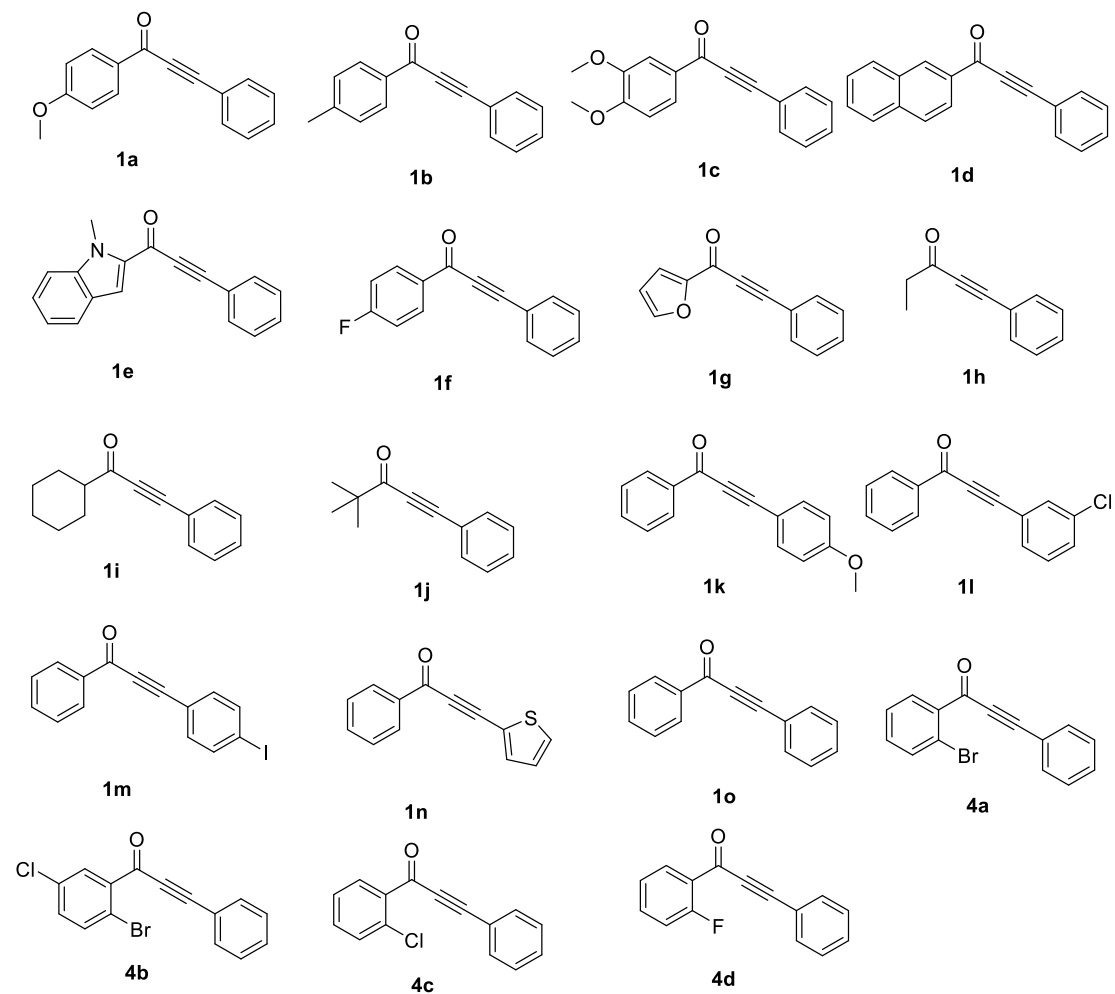

**1a - 1d, 1g, 1k, 4b<sup>1</sup>; 1f, 1l, 1o<sup>2</sup>; 1e<sup>3</sup>; 1i - 1j<sup>4</sup>; 1h<sup>5</sup>; 1m<sup>6</sup>; 1n<sup>7</sup>; 4a, 4c, 4d<sup>8</sup>**

### 2.2 Synthesis of allyl ketones 2

All the substrates **2** are known compounds and have been prepared according to methods reported in the previous literature.

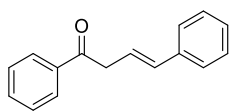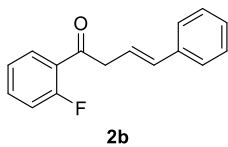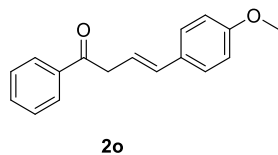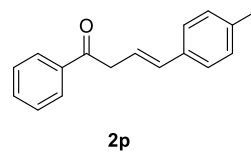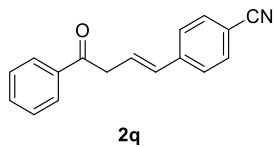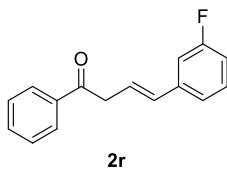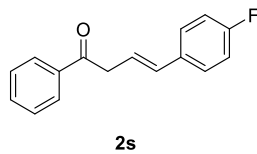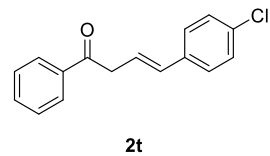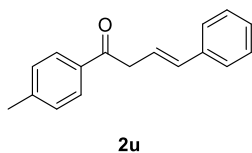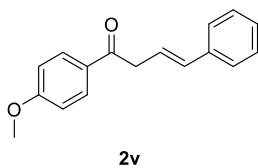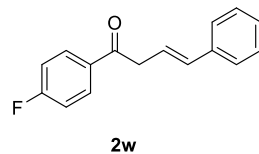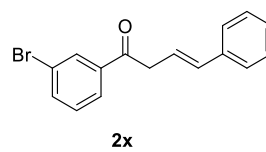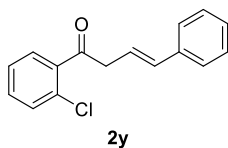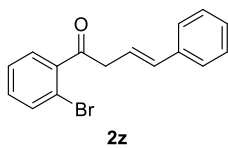

**2a, 2s, 2t<sup>9</sup>; 2v, 2w, 2r<sup>10</sup>; 2o, 2x<sup>11</sup>; 2b, 2y, 2z, 2u, 2p, 2q<sup>12</sup>**

## 4. Experimental Section

### 4.1 General procedure for the synthesis of trienes **3**

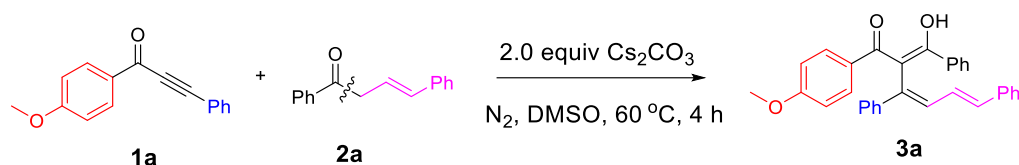

In an oven-dried Schlenk tube was charged with a stir bar, alkynones **1a** (0.30 mmol, 1.0 equiv.), *(E)*- allyl ketones **2a** (0.36 mmol, 1.2 equiv.),  $\text{Cs}_2\text{CO}_3$  (0.6 mmol, 2.0 equiv.) and DMSO (3.0 mL). The mixture was stirred at 60 °C for 4 hours. Upon completion of the reaction, the reaction mixture was cooled down to room temperature and then quenched by water. The aqueous layer was extracted with ethyl acetate (10 mL  $\times$  3). The combined organic layers were washed with brine, dried with anhydrous  $\text{Na}_2\text{SO}_4$ , filtered, and concentrated under reduced pressure. The pure products **3a** were isolated by column chromatography on silica gel (eluted with PE/EA, 12:1).

### 4.2 General procedure for the synthesis of chromones **5**

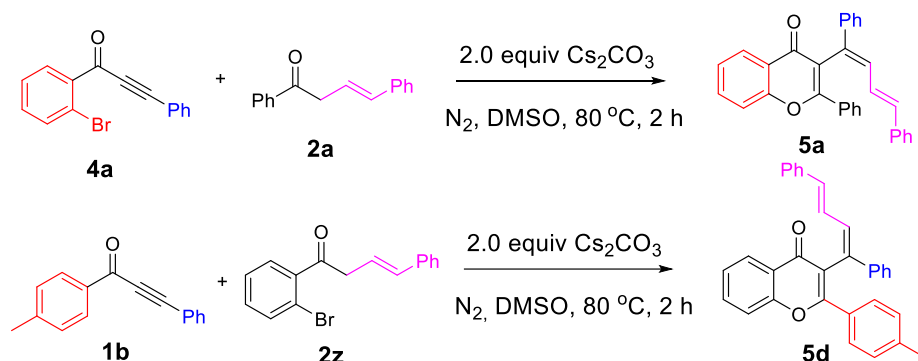

In an oven-dried Schlenk tube was charged with a stir bar, alkynones **4a** or **1b** (0.30 mmol, 1.0 equiv.), *(E)*- allyl ketones **2a** or **2z** (0.36 mmol, 1.2 equiv.),  $\text{Cs}_2\text{CO}_3$  (0.6 mmol, 2.0 equiv.) and DMSO (3.0 mL). The mixture was stirred at 80 °C for 2 hours. Upon completion of the reaction, the reaction mixture was cooled down to room temperature and then quenched by water. The aqueous layer was extracted with ethyl acetate (10 mL  $\times$  3). The combined organic layers were washed with brine, dried with anhydrous  $\text{Na}_2\text{SO}_4$ , filtered, and concentrated under reduced pressure. The pure products **5a** or **5d** were isolated by column chromatography on silica gel (eluted with PE/EA, 10:1).

### 4.3 Characterization data of products

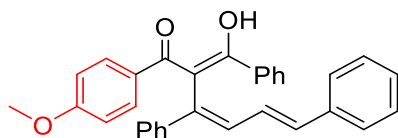

**(2Z,3Z,5E)-2-(hydroxy(phenyl)methylene)-1-(4-methoxyphenyl)-3,6-diphenylhexa-3,5-dien-1-one (3a).** Following the general procedure, the crude product was purified by column chromatography (PE/EA = 12:1, v/v) to provide the title compound as a yellow solid (111.4 mg, 81% yield). m.p. 148 - 150 °C.  $^1\text{H NMR}$  (500 MHz,  $\text{CDCl}_3$ )  $\delta$  18.23 (s, 1H), 7.64 - 7.61 (m, 2H), 7.46 - 7.43 (m, 2H), 7.40 - 7.37 (m, 2H), 7.32 - 7.29 (m, 4H), 7.25 - 7.16 (m, 4H), 7.15 - 7.10 (m, 3H), 6.99 - 6.93 (m, 1H), 6.68 - 6.65 (m, 3H), 6.49 (d,  $J$  = 20.0 Hz, 1H), 3.70 (s, 3H).  $^{13}\text{C NMR}$  (125 MHz,  $\text{CDCl}_3$ )  $\delta$  189.89, 189.24, 161.71, 141.44, 137.29, 137.21, 136.95, 134.72, 131.28, 130.24, 130.02, 129.29, 128.61, 128.36, 127.78, 127.59, 127.31, 126.49, 126.46, 126.42, 113.09, 108.99, 55.17. **HRMS** (ESI) calcd for  $\text{C}_{32}\text{H}_{27}\text{O}_3$   $[\text{M} + \text{H}]^+$ : 459.1955, found: 459.1955.

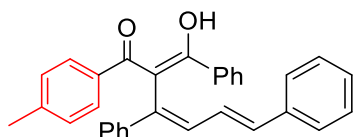

**(2Z,3Z,5E)-2-(hydroxy(phenyl)methylene)-3,6-diphenyl-1-(p-tolyl)hexa-3,5-dien-1-one (3b).** Following the general procedure, the crude product was purified by column chromatography (PE/EA = 20:1, v/v) to provide the title compound as a yellow solid (108.9 mg, 82% yield). m.p. 166 - 168 °C.  $^1\text{H NMR}$  (500 MHz,  $\text{CDCl}_3$ )  $\delta$  18.09 (s, 1H), 7.48 - 7.45 (m, 4H), 7.37 - 7.34 (m, 2H), 7.32 - 7.28 (m, 4H), 7.24 - 7.08 (m, 7H), 6.98 - 6.92 (m, 3H), 6.64 (d,  $J$  = 15.0 Hz, 1H), 6.48 (d,  $J$  = 20.0 Hz, 1H), 2.22 (s, 3H).  $^{13}\text{C NMR}$  (125 MHz,  $\text{CDCl}_3$ )  $\delta$  190.29, 189.96, 141.48, 141.17, 137.24, 136.79, 134.71, 134.15, 131.28, 130.40, 128.62, 128.46, 128.43, 128.31, 127.78, 127.73, 127.62, 127.39, 127.27, 126.49, 126.44, 109.35, 21.43. **HRMS** (ESI) calcd for  $\text{C}_{32}\text{H}_{27}\text{O}_2$   $[\text{M} + \text{H}]^+$ : 443.2006, found: 443.1997.

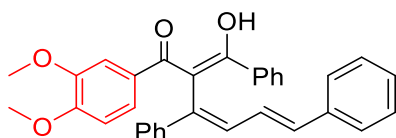

**(2Z,3Z,5E)-1-(3,4-dimethoxyphenyl)-2-(hydroxy(phenyl)methylene)-3,6-diphenylhexa-3,5-dien-1-one (3c).** Following the general procedure, the crude product was purified by column chromatography (PE/EA = 10:1, v/v) to provide the title compound as a yellow solid (96.7 mg, 66% yield). m.p. 183 - 185 °C.  $^1\text{H NMR}$  (500 MHz,  $\text{CDCl}_3$ )  $\delta$  18.02 (s, 1H), 7.48 - 7.46 (m, 2H), 7.42 - 7.40 (m, 2H), 7.34 - 7.29 (m, 5H), 7.24 - 7.10 (m, 8H), 7.01 - 6.94 (m, 1H), 6.71 (d,  $J$  = 20.0 Hz, 1H), 6.64 (d,  $J$  = 10.0 Hz, 1H), 6.50 (d,  $J$  = 20.0 Hz, 1H), 3.79 (s, 3H), 3.57 (s, 3H).  $^{13}\text{C NMR}$  (125 MHz,

CDCl<sub>3</sub>) 189.84, 189.15, 151.25, 147.86, 141.17, 137.14, 137.09, 136.90, 134.81, 131.20, 130.33, 129.48, 128.63, 128.44, 127.85, 127.63, 127.40, 127.37, 126.49, 126.32, 126.29, 121.90, 110.97, 109.96, 108.94, 55.75, 55.51. **HRMS** (ESI) calcd for C<sub>33</sub>H<sub>28</sub>O<sub>4</sub>Na [M + Na]<sup>+</sup>: 511.1880, found: 511.1880.

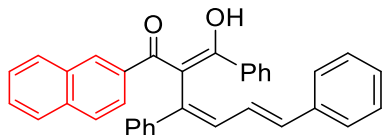

**(2Z,3Z,5E)-2-(hydroxy(phenyl)methylene)-1-(naphthalen-2-yl)-3,6-diphenylhexa-3,5-dien-1-one (3d)**. Following the general procedure, the crude product was purified by column chromatography (PE/EA = 15:1, v/v) to provide the title compound as a yellow solid (97.6 mg, 68% yield). m.p. 182 - 184 °C. **<sup>1</sup>H NMR** (500 MHz, CDCl<sub>3</sub>) δ 18.02 (s, 1H), 8.02 (d, *J* = 10.0 Hz, 1 H), 7.68 - 7.63 (m, 4H), 7.37 - 7.34 (m, 1H), 7.31 - 7.25 (m, 4H), 7.21 - 7.17 (m, 3H), 7.16 - 7.11 (m, 5 H), 7.00 - 6.97 (m, 2H), 6.95 - 6.93 (m, 1H), 6.90 - 6.87 (m, 1H), 6.40 (d, *J* = 15.0 Hz, 1H), 6.32 (d, *J* = 20.0 Hz, 1H); **<sup>13</sup>C NMR** (125 MHz, CDCl<sub>3</sub>) δ 193.38, 188.95, 141.68, 137.05, 136.54, 134.50, 134.38, 133.16, 131.10, 131.07, 129.85, 129.57, 128.45, 128.03, 128.01, 127.85, 127.66, 126.95, 126.50, 126.40, 126.36, 125.73, 125.50, 124.96, 123.94, 111.63. **HRMS** (ESI) calcd for C<sub>35</sub>H<sub>27</sub>O<sub>2</sub> [M + H]<sup>+</sup>: 479.2006, found: 479.2006

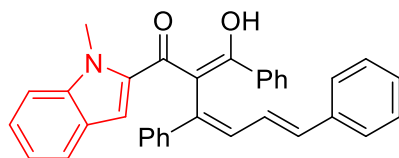

**(2Z,3Z,5E)-2-(hydroxy(phenyl)methylene)-1-(1-methyl-1H-indol-2-yl)-3,6-diphenylhexa-3,5-dien-1-one (3e)**. Following the general procedure, the crude product was purified by column chromatography (PE/EA = 15:1, v/v) to provide the title compound as a yellow solid (80.9 mg, 68% yield). m.p. 122 - 124 °C. **<sup>1</sup>H NMR** (500 MHz, CDCl<sub>3</sub>) δ 18.02 (s, 1H), 7.53 - 7.50 (m, 2H), 7.48 - 7.44 (m, 2H), 7.43 - 7.41 (m, 1H), 7.34 - 7.27 (m, 4H), 7.24 - 7.09 (m, 9H), 7.07 - 7.01 (m, 1H), 7.01 - 6.97 (m, 1H), 6.94 (s, 1H), 6.78 (d, *J* = 20.0 Hz, 1H), 6.54 (d, *J* = 20.0 Hz, 1H), 3.87 (s, 3H). **<sup>13</sup>C NMR** (125 MHz, CDCl<sub>3</sub>) δ 185.62, 185.42, 141.31, 139.29, 137.06, 136.65, 136.37, 134.96, 134.27, 131.45, 130.41, 128.61, 128.47, 127.80, 127.73, 127.40, 127.38, 126.44, 126.23, 126.12, 124.63, 122.35, 120.03, 110.22, 109.88, 32.13. **HRMS** (ESI) calcd for C<sub>34</sub>H<sub>27</sub>NO<sub>2</sub>Na [M + Na]<sup>+</sup>: 504.1934, found: 504.1932.

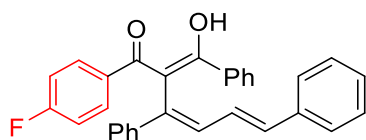

**(2Z,3Z,5E)-1-(4-fluorophenyl)-2-(hydroxy(phenyl)methylene)-3,6-diphenylhexa-3,5-dien-1-one (3f)**. Following the general procedure, the crude product was purified by column chromatography (PE/EA = 30:1, v/v) to provide the title compound as a

yellow solid (60.3 mg, 45% yield). m.p. 105 - 107 °C. **<sup>1</sup>H NMR** (500 MHz, CDCl<sub>3</sub>) δ 18.03 (s, 1H), 7.56 - 7.53 (m, 2H), 7.50 - 7.49 (m, 2H), 7.35 - 7.34 (m, 2H), 7.32 - 7.31 (m, 4H), 7.25 - 7.21 (m, 2H), 7.19 - 7.10 (m, 5H), 6.95 - 6.90 (m, 1H), 6.84 - 6.80 (m, 2H), 6.64 (d, *J* = 15.0 Hz, 1H), 6.49 (d, *J* = 20.0 Hz, 1H). **<sup>13</sup>C NMR** (125 MHz, CDCl<sub>3</sub>) δ 190.13, 189.29, 164.01 (d, *J* = 250.0 Hz), 141.31, 137.09, 136.86, 136.49, 135.15, 133.25 (d, *J* = 3.75 Hz), 131.44, 130.75, 130.08 (d, *J* = 8.75 Hz), 128.73, 128.51, 128.00, 127.78, 127.51, 126.55, 126.47, 126.12, 114.93 (d, *J* = 21.3 Hz), 109.45. **HRMS** (ESI) calcd for C<sub>31</sub>H<sub>23</sub>FO<sub>2</sub>Na [M + Na]<sup>+</sup>: 469.1574, found: 469.1577

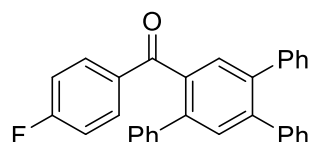

**(4-fluorophenyl)(4'-phenyl-[1,1':2',1''-terphenyl]-3'-yl)methanone (3f')** Following the general procedure, the crude product was purified by column chromatography (PE/EA = 50:1, v/v) to provide the title compound as a white solid (47.6 mg, 37% yield). m.p. 162 - 164 °C. **<sup>1</sup>H NMR** (500 MHz, CDCl<sub>3</sub>) δ 7.77 - 7.76 (m, 2H), 7.58 (s, 1H), 7.53 (s, 1H), 7.44 - 7.41 (m, 1H), 7.34 - 7.29 (m, 4H), 7.24 - 7.18 (m, 10H), 6.96 - 6.93 (m, 2H). **<sup>13</sup>C NMR** (125 MHz, CDCl<sub>3</sub>) δ 198.24, 162.08 (d, *J* = 246.3 Hz), 141.45, 140.45, 140.07, 139.64, 139.38, 138.11, 137.32, 136.54 (d, *J* = 3.75 Hz), 132.98, 132.34, 131.42 (d, *J* = 8.75 Hz), 131.17, 130.04, 129.85, 128.98, 128.38, 128.21, 128.19, 127.54, 127.05, 115.12 (d, *J* = 21.3 Hz). **HRMS** (ESI) calcd for C<sub>31</sub>H<sub>22</sub>FO [M + H]<sup>+</sup>: 429.1649, found: 429.1649

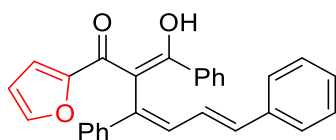

**(2Z,3Z,5E)-1-(furan-2-yl)-2-(hydroxy(phenyl)methylene)-3,6-diphenylhexa-3,5-dien-1-one (3g)**. Following the general procedure, the crude product was purified by column chromatography (PE/EA = 20:1, v/v) to provide the title compound as a yellow solid (79.1 mg, 63% yield). m.p. 104 - 106 °C. **<sup>1</sup>H NMR** (500 MHz, CDCl<sub>3</sub>) δ 18.14 (s, 1H), 7.50 - 7.45 (m, 5H), 7.34 - 7.10 (m, 12H), 6.99 - 6.93 (m, 2H), 6.65 - 6.58 (m, 1H), 6.31 - 6.29 (m, 1H). **<sup>13</sup>C NMR** (125 MHz, CDCl<sub>3</sub>) δ 187.40, 177.67, 149.08, 146.43, 140.60, 136.98, 136.57, 135.40, 135.38, 132.28, 130.41, 128.65, 128.62, 127.96, 127.66, 127.56, 127.51, 126.60, 126.12, 125.99, 120.13, 112.36, 107.40. **HRMS** (ESI) calcd for C<sub>29</sub>H<sub>22</sub>O<sub>3</sub>Na [M + Na]<sup>+</sup>: 441.1461, found: 441.1461.

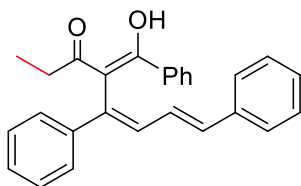

**(4Z,5Z,7E)-4-(hydroxy(phenyl)methylene)-5,8-diphenylocta-5,7-dien-3-one (3h)**.

Following the general procedure, the crude product was purified by column chromatography (PE/EA = 50:1, v/v) to provide the title compound as a yellow oil (54.8 mg, 48% yield). **<sup>1</sup>H NMR** (500 MHz, CDCl<sub>3</sub>) δ 17.56 (s, 1H), 7.56 - 7.54 (m, 2H), 7.48 - 7.45 (m, 2H), 7.36 - 7.28 (m, 6H), 7.24 - 7.20 (m, 3H), 7.16 - 7.12 (m, 2H), 6.90 - 6.87 (m, 2H), 6.66 - 6.59 (m, 1H), 2.45 - 2.39 (m, 1H), 2.28 - 2.23 (m, 1H), 1.03 - 1.00 (m, 3H). **<sup>13</sup>C NMR** (125 MHz, CDCl<sub>3</sub>) δ 202.11, 182.34, 140.90, 137.04, 136.00, 135.90, 135.15, 131.36, 130.55, 128.71, 128.66, 127.94, 127.78, 127.75, 127.67, 126.55, 126.06, 126.01, 109.18, 30.83, 8.85. **HRMS** (ESI) calcd for C<sub>27</sub>H<sub>25</sub>O<sub>2</sub> [M + H]<sup>+</sup>: 381.1849, found: 381.1846.

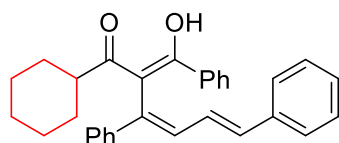

**(2Z,3Z,5E)-1-cyclohexyl-2-(hydroxy(phenyl)methylene)-3,6-diphenylhexa-3,5-dien-1-one (3i).** Following the general procedure, the crude product was purified by column chromatography (PE/EA = 50:1, v/v) to provide the title compound as a yellow solid (88.7 mg, 68% yield). m.p. 163 - 165 °C. **<sup>1</sup>H NMR** (500 MHz, CDCl<sub>3</sub>) δ 17.99 (s, 1H), 7.53 - 7.50 (m, 2H), 7.48 - 7.46 (m, 2H), 7.34 - 7.28 (m, 6H), 7.23 - 7.19 (m, 3H), 7.14 - 7.11 (m, 2H), 6.92 - 6.84 (m, 2H), 6.60 (d, *J* = 20.0 Hz, 1H), 2.46 - 2.41 (m, 1H), 1.69 - 1.61 (m, 2H), 1.57 - 1.39 (m, 5H), 1.15 - 1.09 (m, 1H), 1.05 - 1.00 (m, 1H), 0.90 - 0.84 (m, 1H). **<sup>13</sup>C NMR** (125 MHz, CDCl<sub>3</sub>) δ 202.43, 186.29, 141.47, 137.14, 136.61, 136.19, 134.75, 131.25, 130.47, 128.65, 128.61, 127.83, 127.67, 127.61, 126.50, 126.24, 126.21, 108.63, 44.59, 29.55, 28.94, 25.66, 25.56, 25.42. **HRMS** (ESI) calcd for C<sub>31</sub>H<sub>31</sub>O<sub>2</sub> [M + H]<sup>+</sup>: 435.2319, found: 435.2316.

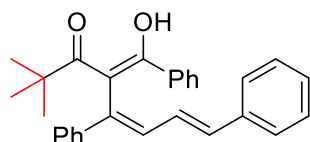

**(4Z,5Z,7E)-4-(hydroxy(phenyl)methylene)-2,2-dimethyl-5,8-diphenylocta-5,7-dien-3-one (3j).** Following the general procedure, the crude product was purified by column chromatography (PE/EA = 60:1, v/v) to provide the title compound as a yellow solid (46.6 mg, 38% yield). m.p. 142 - 144 °C. **<sup>1</sup>H NMR** (500 MHz, CDCl<sub>3</sub>) δ 18.58 (s, 1H), 7.48 - 7.44 (m, 2H), 7.40 - 7.36 (m, 2H), 7.35 - 7.27 (m, 6H), 7.26 - 7.20 (m, 2H), 7.18 - 7.14 (m, 1H), 7.09 - 7.03 (m, 2H), 6.98 - 6.91 (m, 1H), 6.84 - 6.79 (m, 1H), 6.60 - 6.55 (m, 1H), 1.12 (s, 9H). **<sup>13</sup>C NMR** (125 MHz, CDCl<sub>3</sub>) δ 203.63, 189.58, 142.04, 137.56, 137.20, 136.27, 134.72, 132.01, 129.58, 128.72, 128.52, 127.93, 127.47, 127.34, 127.05, 126.92, 126.56, 126.45, 108.13, 43.06, 28.57. **HRMS** (ESI) calcd for C<sub>29</sub>H<sub>29</sub>O<sub>2</sub> [M + H]<sup>+</sup>: 409.2162, found: 409.2159.

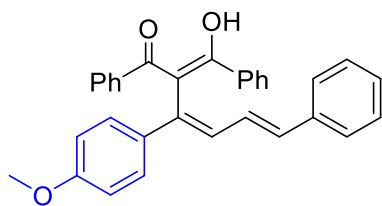

**(2Z,3Z,5E)-2-(hydroxy(phenyl)methylene)-3-(4-methoxyphenyl)-1,6-diphenylhexa-3,5-dien-1-one (3k).** Following the general procedure, the crude product was purified by column chromatography (PE/EA = 20:1, v/v) to provide the title compound as a yellow solid (89.4 mg, 65% yield). m.p. 172 - 174 °C. <sup>1</sup>H NMR (500 MHz, CDCl<sub>3</sub>) δ 18.01 (s, 1H), 7.53 - 7.50 (m, 4H), 7.32 - 7.27 (m, 6H), 7.26 - 7.21 (m, 3H), 7.17 - 7.13 (m, 4H), 6.96 - 6.90 (m, 1H), 6.72 - 6.69 (m, 2H), 6.54 (d, *J* = 15.0 Hz, 1H), 6.44 (d, *J* = 20.0 Hz, 1H), 3.75 (s, 3H). <sup>13</sup>C NMR (125 MHz, CDCl<sub>3</sub>) δ 190.15, 158.97, 137.33, 137.04, 136.11, 134.09, 133.82, 130.60, 129.67, 128.59, 127.65, 127.59, 127.43, 126.47, 126.37, 113.76, 109.58, 55.18. HRMS (ESI) calcd for C<sub>32</sub>H<sub>26</sub>O<sub>3</sub>Na [M + Na]<sup>+</sup>: 481.1774, found: 481.1775.

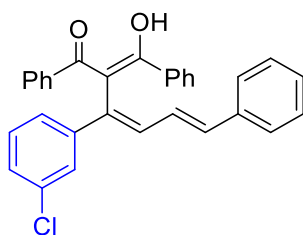

**(2Z,3Z,5E)-3-(3-chlorophenyl)-2-(hydroxy(phenyl)methylene)-1,6-diphenylhexa-3,5-dien-1-one (3l).** Following the general procedure, the crude product was purified by column chromatography (PE/EA = 15:1, v/v) to provide the title compound as a yellow solid (105.6 mg, 76% yield). m.p. 172 - 174 °C. <sup>1</sup>H NMR (500 MHz, CDCl<sub>3</sub>) δ 18.00 (s, 1H), 7.49 - 7.46 (m, 4H), 7.33 - 7.30 (m, 5H), 7.28 - 7.21 (m, 4H), 7.19 - 7.15 (m, 4H), 7.10 - 7.05 (m, 2H), 6.94 - 6.89 (m, 1H), 6.61 (d, *J* = 15.0 Hz, 1H), 6.49 (d, *J* = 20.0 Hz, 1H). <sup>13</sup>C NMR (125 MHz, CDCl<sub>3</sub>) δ 190.38, 143.45, 136.90, 136.82, 135.79, 135.17, 134.33, 132.33, 130.75, 129.51, 128.66, 128.07, 127.77, 127.38, 127.18, 126.59, 126.29, 125.88, 124.57, 109.05. HRMS (ESI) calcd for C<sub>31</sub>H<sub>23</sub>ClO<sub>2</sub>Na [M + Na]<sup>+</sup>: 485.1279, found: 485.1279.

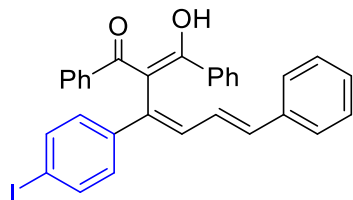

**(2Z,3Z,5E)-2-(hydroxy(phenyl)methylene)-3-(4-iodophenyl)-1,6-diphenylhexa-3,5-dien-1-one (3m).** Following the general procedure, the crude product was purified by column chromatography (PE/EA = 10:1, v/v) to provide the title compound as a yellow solid (99.8 mg, 60% yield). m.p. 157 - 159 °C. <sup>1</sup>H NMR (500 MHz, CDCl<sub>3</sub>) δ

18.01 (s, 1H), 7.49 - 7.46 (m, 6H), 7.32 - 7.31 (m, 4H), 7.27 - 7.22 (m, 3H), 7.17 - 7.14 (m, 4H), 7.09 - 7.07 (m, 2H), 6.94 - 6.89 (m, 1H), 6.61 (d,  $J = 20.0$  Hz, 1H), 6.49 (d,  $J = 20.0$  Hz, 1H).  $^{13}\text{C}$  NMR (125 MHz,  $\text{CDCl}_3$ )  $\delta$  190.31, 141.04, 137.41, 136.96, 136.84, 135.55, 135.50, 131.86, 130.79, 128.67, 128.06, 128.03, 127.79, 127.39, 126.57, 125.99, 108.92, 92.91. HRMS (ESI) calcd for  $\text{C}_{31}\text{H}_{24}\text{IO}_2$   $[\text{M} + \text{H}]^+$ : 555.0812, found: 555.1744.

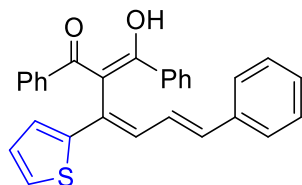

**(2Z,3E,5E)-2-(hydroxy(phenyl)methylene)-1,6-diphenyl-3-(thiophen-2-yl)hexa-3,5-dien-1-one (3n).** Following the general procedure, the crude product was purified by column chromatography (PE/EA = 15:1, v/v) to provide the title compound as a yellow solid (87.3 mg, 67% yield). m.p. 110 - 112 °C.  $^1\text{H}$  NMR (500 MHz,  $\text{CDCl}_3$ )  $\delta$  18.06 (s, 1H), 7.59 - 7.56 (m, 4H), 7.32 - 7.30 (m, 3H), 7.29 - 7.25 (m, 2H), 7.24 - 7.17 (m, 6H), 7.04 - 7.02 (m, 1H), 6.95 - 6.93 (m, 1H), 6.92 - 6.86 (m, 1H), 6.82 - 6.79 (m, 1H), 6.59 (d,  $J = 20.0$  Hz, 1H), 6.49 (d,  $J = 10.0$  Hz, 1H).  $^{13}\text{C}$  NMR (125 MHz,  $\text{CDCl}_3$ )  $\delta$  190.18, 147.61, 137.11, 136.90, 134.76, 130.90, 130.77, 130.46, 128.66, 127.87, 127.77, 127.63, 127.43, 126.50, 125.43, 125.17, 124.98, 109.13. HRMS (ESI) calcd for  $\text{C}_{29}\text{H}_{22}\text{O}_2\text{SNa}$   $[\text{M} + \text{Na}]^+$ : 457.1233, found: 457.1233

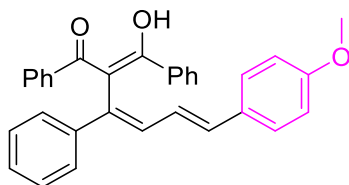

**(2Z,3Z,5E)-2-(hydroxy(phenyl)methylene)-6-(4-methoxyphenyl)-1,3-diphenylhexa-3,5-dien-1-one (3o).** Following the general procedure, the crude product was purified by column chromatography (PE/EA = 15:1, v/v) to provide the title compound as a yellow solid (72.9 mg, 53% yield). m.p. 165 - 167 °C.  $^1\text{H}$  NMR (500 MHz,  $\text{CDCl}_3$ )  $\delta$  18.00 (s, 1H), 7.52 - 7.49 (m, 4H), 7.34 - 7.31 (m, 2H), 7.27 - 7.20 (m, 4H), 7.17 - 7.12 (m, 6H), 7.10 - 7.06 (m, 1H), 6.86 - 6.84 (m, 2H), 6.82 - 6.78 (m, 1H), 6.60 (d,  $J = 15.0$  Hz, 1H), 6.42 (d,  $J = 20.0$  Hz, 1H), 3.81 (s, 3H).  $^{13}\text{C}$  NMR (125 MHz,  $\text{CDCl}_3$ )  $\delta$  190.29, 159.46, 141.59, 137.07, 135.30, 134.43, 131.61, 130.56, 130.02, 128.28, 127.78, 127.65, 127.46, 127.05, 126.37, 124.38, 114.09, 109.65, 55.31. HRMS (ESI) calcd for  $\text{C}_{32}\text{H}_{27}\text{O}_3$   $[\text{M} + \text{H}]^+$ : 459.1955, found: 459.1955

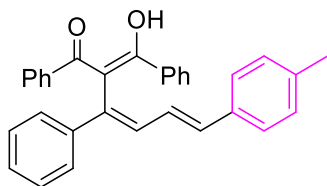

**(2Z,3Z,5E)-2-(hydroxy(phenyl)methylene)-1,3-diphenyl-6-(p-tolyl)hexa-3,5-dien-1-one (3p).** Following the general procedure, the crude product was purified by column chromatography (PE/EA = 30:1, v/v) to provide the title compound as a yellow solid (71.7 mg, 54% yield). m.p. 166 - 168 °C. **<sup>1</sup>H NMR** (500 MHz, CDCl<sub>3</sub>) δ 18.00 (s, 1H), 7.51 - 7.48 (m, 4H), 7.34 - 7.32 (m, 2H), 7.25 - 7.20 (m, 4H), 7.17 - 7.15 (m, 3H), 7.14 - 7.08 (m, 6H), 6.92 - 6.86 (m, 1H), 6.61 (d, *J* = 15.0 Hz, 1H), 6.44 (d, *J* = 20.0 Hz, 1H), 2.34 (s, 3H). **<sup>13</sup>C NMR** (125 MHz, CDCl<sub>3</sub>) δ 190.30, 141.54, 137.85, 137.05, 135.93, 134.81, 134.40, 131.51, 130.56, 129.35, 128.29, 127.65, 127.46, 127.15, 126.43, 125.39, 109.62, 21.28. **HRMS** (ESI) calcd for C<sub>32</sub>H<sub>27</sub>O<sub>2</sub> [M + H]<sup>+</sup>: 443.2006, found: 443.2006.

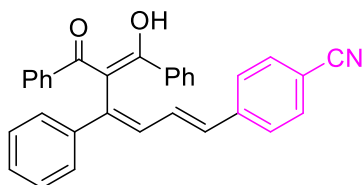

**4-((1E,3Z,5Z)-5-benzoyl-6-hydroxy-4,6-diphenylhexa-1,3,5-trien-1-yl)benzonitrile (3q).** Following the general procedure, the crude product was purified by column chromatography (PE/EA = 10:1, v/v) to provide the title compound as a yellow solid (28.6 mg, 21% yield). m.p. 190 - 192 °C. **<sup>1</sup>H NMR** (500 MHz, CDCl<sub>3</sub>) δ 18.00 (s, 1H), 7.49 - 7.46 (m, 4H), 7.34 - 7.29 (m, 5H), 7.27 - 7.20 (m, 4H), 7.18 - 7.14 (m, 4H), 7.10 - 7.05 (m, 2H), 6.94 - 6.88 (m, 1H), 6.61 (d, *J* = 15.0 Hz, 1H), 6.49 (d, *J* = 20.0 Hz, 1H). **<sup>13</sup>C NMR** (125 MHz, CDCl<sub>3</sub>) δ 190.30, 141.57, 141.17, 139.55, 136.82, 132.39, 132.21, 130.75, 130.26, 129.65, 128.42, 127.85, 127.74, 127.43, 126.72, 126.68, 119.00, 110.50, 109.36. **HRMS** (ESI) calcd for C<sub>32</sub>H<sub>24</sub>NO<sub>2</sub> [M + H]<sup>+</sup>: 454.1802, found: 454.1802.

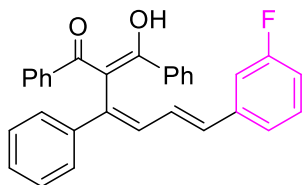

**(2Z,3Z,5E)-6-(3-fluorophenyl)-2-(hydroxy(phenyl)methylene)-1,3-diphenylhexa-3,5-dien-1-one (3r).** Following the general procedure, the crude product was purified by column chromatography (PE/EA = 20:1, v/v) to provide the title compound as a yellow solid (111.2 mg, 83% yield). m.p. 135 - 137 °C. **<sup>1</sup>H NMR** (500 MHz, CDCl<sub>3</sub>) δ 18.02 (s, 1H), 7.51 - 7.49 (m, 4H), 7.36 - 7.33 (m, 2H), 7.27 - 7.21 (m, 3H), 7.19 - 7.09 (m, 7H), 7.08 - 7.05 (m, 1H), 6.70 - 6.95 (m, 1H), 6.93 - 6.88 (m, 2H), 6.60 - 6.56 (m, 1H), 6.40 (d, *J* = 20.0 Hz, 1H). **<sup>13</sup>C NMR** (125 MHz, CDCl<sub>3</sub>) δ 190.33, 163.12 (d, *J* =

243.8 Hz), 141.44, 139.58 (d,  $J = 7.5$  Hz), 137.78, 137.02, 133.34, 133.32, 130.78, 130.68, 130.06 (d,  $J = 7.5$  Hz), 128.39, 127.74, 127.50, 126.63, 122.28 (d,  $J = 2.5$  Hz), 114.56 (d,  $J = 21.3$  Hz) 112.85 (d,  $J = 21.3$  Hz), 109.51. **HRMS** (ESI) calcd for  $C_{31}H_{24}FO_2$   $[M + H]^+$ : 447.1755, found: 447.1755

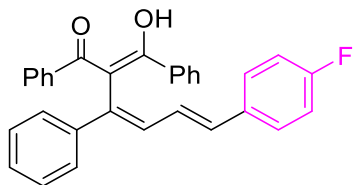

**(2Z,3Z,5E)-6-(4-fluorophenyl)-2-(hydroxy(phenyl)methylene)-1,3-diphenylhexa-3,5-dien-1-one (3s)**. Following the general procedure, the crude product was purified by column chromatography (PE/EA = 20:1, v/v) to provide the title compound as a yellow solid (91.1 mg, 68% yield). m.p. 175 - 177 °C.  **$^1H$  NMR** (500 MHz,  $CDCl_3$ )  $\delta$  18.01 (s, 1H), 7.51 - 7.48 (m, 4H), 7.35 - 7.32 (m, 2H), 7.28 - 7.21 (m, 4H), 7.18 - 7.08 (m, 7H), 7.02 - 6.97 (m, 2H), 6.87 - 6.81 (m, 1H), 6.58 (d,  $J = 15.0$  Hz, 1H), 6.40 (d,  $J = 20.0$  Hz, 1H).  **$^{13}C$  NMR** (125 MHz,  $CDCl_3$ )  $\delta$  190.34, 162.43 ( $J = 246.3$  Hz), 141.50, 137.05, 136.72, 133.44, 131.12, 130.68, 128.39, 128.02 ( $J = 7.50$  Hz), 127.73, 127.51, 127.37, 126.54, 126.10 ( $J = 2.50$  Hz), 115.67 (d,  $J = 22.5$  Hz), 109.59. **HRMS** (ESI) calcd for  $C_{31}H_{23}FO_2Na$   $[M + Na]^+$ : 469.1574, found: 469.1575

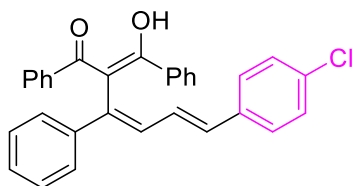

**(2Z,3Z,5E)-6-(4-chlorophenyl)-2-(hydroxy(phenyl)methylene)-1,3-diphenylhexa-3,5-dien-1-one (3t)**. Following the general procedure, the crude product was purified by column chromatography (PE/EA = 15:1, v/v) to provide the title compound as a yellow solid (70.8 mg, 51% yield). m.p. 198 - 200 °C.  **$^1H$  NMR** (500 MHz,  $CDCl_3$ )  $\delta$  18.01 (s, 1H), 7.50 - 7.47 (m, 4H), 7.35 - 7.32 (m, 2H), 7.28 - 7.26 (m, 2H), 7.25 - 7.20 (m, 4H), 7.18 - 7.08 (m, 7H), 6.93 - 6.86 (m, 1H), 6.58 (d,  $J = 15.0$  Hz, 1H), 6.38 (d,  $J = 20.0$  Hz, 1H).  **$^{13}C$  NMR** (125 MHz,  $CDCl_3$ )  $\delta$  190.29, 141.41, 137.27, 136.96, 135.64, 133.31, 133.20, 130.91, 130.64, 128.79, 128.34, 127.69, 127.57, 127.51, 127.44, 127.42, 126.80, 126.54, 109.50. **HRMS** (ESI) calcd for  $C_{31}H_{23}ClO_2Na$   $[M + Na]^+$ : 485.1279, found: 485.1279.

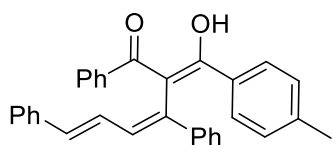

**(2Z,3Z,5E)-2-(hydroxy(p-tolyl)methylene)-1,3,6-triphenylhexa-3,5-dien-1-one (3u)**  
Following the general procedure, the crude product was purified by column

chromatography (PE/EA = 30:1, v/v) to provide the title compound as a yellow solid (42.5 mg, 32% yield). m.p. 169 - 171 °C. **<sup>1</sup>H NMR** (500 MHz, CDCl<sub>3</sub>) δ 18.12 (s, 1H), 7.47 - 7.45 (m, 4H), 7.36 - 7.35 (m, 2H), 7.31 - 7.30 (m, 4H), 7.22 - 7.10 (m, 7H), 6.98 - 6.92 (m, 3H), 6.64 (d, *J* = 15.0 Hz, 1H), 6.48 (d, *J* = 20.0 Hz, 1H). **<sup>13</sup>C NMR** (125 MHz, CDCl<sub>3</sub>) δ 190.29, 189.95, 141.47, 141.17, 137.24, 136.79, 134.70, 134.14, 131.27, 130.40, 128.62, 128.43, 128.31, 127.78, 127.72, 127.62, 127.39, 127.26, 126.49, 126.43, 109.34, 21.43. **HRMS** (ESI) calcd for C<sub>32</sub>H<sub>27</sub>O<sub>2</sub> [M + H]<sup>+</sup>: 443.2006, found: 443.2006.

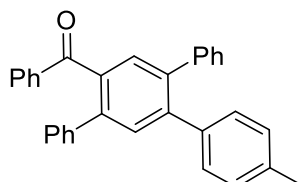

**(4''-methyl-4'-phenyl-[1,1':2',1''-terphenyl]-3'-yl)(phenyl)methanone (3u').**

Following the general procedure, the crude product was purified by column chromatography (PE/EA = 45:1, v/v) to provide the title compound as a white solid (29.3 mg, 23% yield). m.p. 168 - 170 °C. **<sup>1</sup>H NMR** (500 MHz, CDCl<sub>3</sub>) δ 7.71 - 7.70 (m, 2H), 7.56 - 7.55 (m, 2H), 7.36 - 7.35 (m, 2H), 7.25 - 7.18 (m, 13H), 7.13 - 7.11 (m, 2H), 2.34 (s, 3H). **<sup>13</sup>C NMR** (125 MHz, CDCl<sub>3</sub>) δ 197.89, 143.83, 142.27, 140.59, 140.26, 140.17, 139.77, 139.19, 138.16, 134.80, 132.47, 130.94, 130.25, 129.83, 129.79, 128.93, 128.91, 128.30, 128.03, 127.99, 127.38, 126.99, 126.84, 77.25, 77.00, 76.75, 21.64. **HRMS** (ESI) calcd for C<sub>32</sub>H<sub>24</sub>ONa [M + Na]<sup>+</sup>: 447.1719, found: 447.1846.

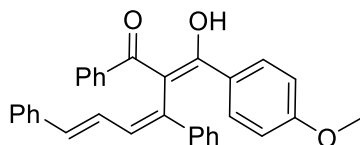

**(2Z,3Z,5E)-2-(hydroxy(4-methoxyphenyl)methylene)-1,3,6-triphenylhexa-3,5-dien-1-one (3v).** Following the general procedure, the crude product was purified by column chromatography (PE/EA = 15:1, v/v) to provide the title compound as a yellow solid (41.3 mg, 30% yield). m.p. 126 - 128 °C. **<sup>1</sup>H NMR** (500 MHz, CDCl<sub>3</sub>) δ 18.23 (s, 1H), 7.63-7.60 (m, 2H), 7.45-7.43 (m, 2H), 7.39-7.37 (m, 2H), 7.32-7.30 (m, 4H), 7.22-7.10 (m, 7H), 6.99-6.92 (m, 1H), 6.67-6.64 (m, 3H), 6.49 (d, *J* = 20.0 Hz, 1H). **<sup>13</sup>C NMR** (125 MHz, CDCl<sub>3</sub>) δ 189.89, 189.23, 161.70, 141.43, 137.28, 137.20, 136.94, 134.72, 131.27, 130.24, 130.02, 129.28, 128.61, 128.36, 127.77, 127.59, 127.31, 127.30, 126.48, 126.46, 126.41, 113.09, 108.98, 55.17. **HRMS** (ESI) calcd for C<sub>32</sub>H<sub>27</sub>O<sub>3</sub> [M + H]<sup>+</sup>: 459.1955, found: 459.1946.

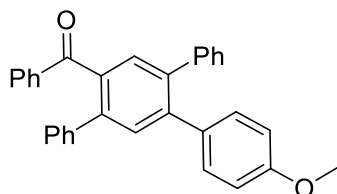

**(4''-methoxy-4'-phenyl-[1,1':2',1''-terphenyl]-3'-yl)(phenyl)methanone (3v').**

Following the general procedure, the crude product was purified by column chromatography (PE/EA = 40:1, v/v) to provide the title compound as a white solid (42.3 mg, 32% yield). m.p. 158 - 160 °C. **<sup>1</sup>H NMR** (500 MHz, CDCl<sub>3</sub>) δ 7.79 - 7.77 (m, 2H), 7.56 - 7.55 (m, 2H), 7.38 - 7.36 (m, 2H), 7.23 - 7.22 (m, 8H), 7.21 - 7.20 (m, 5H), 6.81 - 6.79 (m, 2H), 3.80 (s, 3H). **<sup>13</sup>C NMR** (125 MHz, CDCl<sub>3</sub>) δ 196.91, 163.47, 142.18, 140.67, 140.34, 140.02, 139.83, 139.26, 138.33, 132.49, 132.46, 130.86, 130.36, 129.89, 129.84, 128.93, 128.36, 128.08, 128.04, 127.45, 127.01, 126.88, 113.51, 55.44. **HRMS** (ESI) calcd for C<sub>32</sub>H<sub>24</sub>O<sub>2</sub> [M + H]<sup>+</sup>: 441.1849, found: 441.1846.

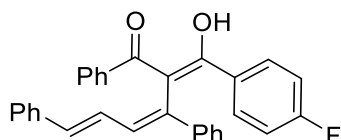

**(2Z,3Z,5E)-2-((4-fluorophenyl)(hydroxy)methylene)-1,3,6-triphenylhexa-3,5-dien-1-one (3w)**. Following the general procedure, the crude product was purified by column chromatography (PE/EA = 30:1, v/v) to provide the title compound as a yellow solid (116.5 mg, 87% yield). m.p. 112 - 114 °C. **<sup>1</sup>H NMR** (600 MHz, CDCl<sub>3</sub>) δ 17.99 (s, 1H), 7.56 - 7.52 (m, 2H), 7.51 - 7.48 (m, 2H), 7.35 - 7.33 (m, 2H), 7.31 - 7.28 (m, 4H), 7.24 - 7.20 (m, 2H), 7.19 - 7.16 (m, 2H), 7.15 - 7.09 (m, 3H), 6.95 - 6.89 (m, 1H), 6.83 - 6.80 (m, 2H), 6.64 (d, *J* = 18.0 Hz, 1H), 6.49 (d, *J* = 18.0 Hz, 1H). **<sup>13</sup>C NMR** (150 MHz, CDCl<sub>3</sub>) δ 190.11, 189.25, 164.02 (d, *J* = 249.0 Hz), 141.32, 136.90, 136.90, 136.51, 135.15, 133.28 (*J* = 3.0 Hz), 131.45, 130.71, 130.07 (d, *J* = 9.0 Hz), 128.71, 128.50, 127.98, 127.76, 127.51, 126.55, 126.47, 126.15, 114.90 (d, *J* = 22.5 Hz), 109.47. **HRMS** (ESI) calcd for C<sub>31</sub>H<sub>24</sub>FO<sub>2</sub> [M + H]<sup>+</sup>: 447.1755, found: 447.1759.

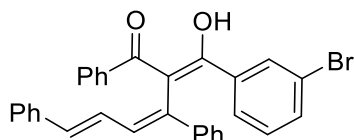

**(2Z,3Z,5E)-2-((3-bromophenyl)(hydroxy)methylene)-1,3,6-triphenylhexa-3,5-dien-1-one (3x)**. Following the general procedure, the crude product was purified by column chromatography (PE/EA = 10:1:1, v/v) to provide the title compound as a yellow solid (129.4 mg, 85% yield). m.p. 136 - 138 °C. **<sup>1</sup>H NMR** (600 MHz, CDCl<sub>3</sub>) δ 17.85 (s, 1H), 7.64 (s, 1H), 7.54 - 7.53 (m, 2H), 7.39 - 7.38 (m, 1H), 7.33 - 7.31 (m, 7H), 7.24 - 7.23 (m, 2H), 7.19 - 7.12 (m, 5H), 7.00 - 6.97 (m, 1H), 6.92 - 6.87 (m, 1H), 6.64 (d, *J* = 18.0 Hz, 1H), 6.50 (d, *J* = 18.0 Hz, 1H). **<sup>13</sup>C NMR** (150 MHz, CDCl<sub>3</sub>) δ 190.22, 188.61, 141.25, 138.92, 137.05, 136.63, 136.08, 135.25, 133.35, 131.54, 130.89, 130.56, 129.18, 128.67, 128.46, 127.94, 127.76, 127.56, 127.48, 126.53, 126.44, 126.01, 125.97, 121.72, 109.70. **HRMS** (ESI) calcd for C<sub>31</sub>H<sub>24</sub>BrO<sub>2</sub> [M + H]<sup>+</sup>: 501.1826, found: 501.1830.

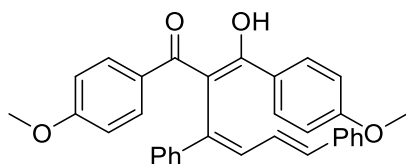

**(2Z,3Z,5E)-2-(hydroxy(4-methoxyphenyl)methylene)-1-(4-methoxyphenyl)-3,6-diphenylhexa-3,5-dien-1-one (3y).** Following the general procedure, the crude product was purified by column chromatography (PE/EA = 20:1:1, v/v) to provide the title compound as a yellow solid (71.7 mg, 49% yield). m.p. 168 - 170 °C. <sup>1</sup>H NMR (500 MHz, CDCl<sub>3</sub>) δ 18.40 (s, 1H), 7.56 - 7.54 (m, 4H), 7.42 - 7.40 (m, 2H), 7.30 - 7.29 (m, 4H), 7.20 - 7.17 (m, 3H), 7.13 - 7.10 (m, 1H), 6.98 - 6.93 (m, 1H), 6.71 (d, *J* = 15.0 Hz, 1H), 6.65 - 6.63 (m, 4H), 6.51 (d, *J* = 20.0 Hz, 1H), 3.69 (s, 6H). <sup>13</sup>C NMR (125 MHz, CDCl<sub>3</sub>) δ 188.93, 161.42, 141.41, 137.27, 137.25, 134.68, 131.25, 129.79, 129.61, 128.58, 128.40, 127.72, 127.34, 126.51, 126.49, 126.43, 113.01, 108.52, 77.26, 77.00, 76.75, 55.13. HRMS (ESI) calcd for C<sub>33</sub>H<sub>29</sub>O<sub>4</sub> [M + H]<sup>+</sup>: 489.2060, found: 489.2062.

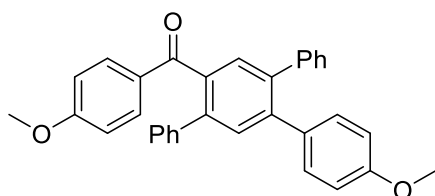

**(4''-methoxy-4'-phenyl-[1,1':2',1''-terphenyl]-3'-yl)(4-methoxyphenyl)methanone (3y')** Following the general procedure, the crude product was purified by column chromatography (PE/EA = 15:1:1, v/v) to provide the title compound as a white solid (22.0 mg, 16% yield). m.p. 190 - 192 °C. <sup>1</sup>H NMR (500 MHz, CDCl<sub>3</sub>) δ 7.78 - 7.77 (m, 2H), 7.53 - 7.52 (m, 2H), 7.37 - 7.14 (m, 2H), 7.25 - 7.19 (m, 8H), 7.15 - 7.14 (m, 2H), 6.80 - 6.78 (m, 4H), 3.80 (s, 3H), 3.79 (s, 3H). <sup>13</sup>C NMR (125 MHz, CDCl<sub>3</sub>) δ 196.91, 163.39, 158.70, 141.76, 140.53, 140.02, 139.89, 139.08, 137.91, 132.94, 132.44, 132.32, 130.91, 130.38, 129.82, 128.88, 128.30, 128.05, 127.37, 126.76, 113.53, 113.45, 55.40, 55.19. HRMS (ESI) calcd for C<sub>33</sub>H<sub>27</sub>O<sub>3</sub> [M + H]<sup>+</sup>: 471.1955, found: 471.1957

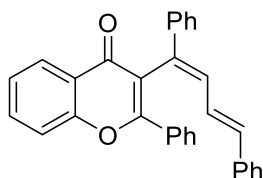

**3-((1Z,3E)-1,4-diphenylbuta-1,3-dien-1-yl)-2-phenyl-4H-chromen-4-one (5a)** Following the general procedure, the crude product was purified by column chromatography (PE/EA = 10:1:1, v/v) to provide the title compound as a yellow solid (58.3 mg, 46% yield) m.p. 174 - 176 °C. <sup>1</sup>H NMR (600 MHz, CDCl<sub>3</sub>) δ 8.30 - 8.28 (m, 1H), 7.76 - 7.73 (m, 1H), 7.69 - 7.67 (m, 2H), 7.60 (d, *J* = 12.0 Hz, 1H), 7.47 - 7.42 (m, 3H), 7.35 - 7.31 (m, 1H), 7.30 - 7.18 (m, 9H), 7.18 - 7.14 (m, 1H), 6.96 (d,

$J = 12.0$  1H), 6.73 - 6.67 (m, 1H), 6.64-6.61 (d,  $J = 18.0$  Hz, 1H).  $^{13}\text{C}$  NMR (150 MHz,  $\text{CDCl}_3$ )  $\delta$  177.02, 162.54, 156.25, 140.12, 137.21, 135.19, 133.78, 133.63, 133.02, 131.04, 130.53, 128.51, 128.43, 128.20, 128.18, 127.65, 127.44, 126.55, 125.92, 125.90, 125.18, 123.19, 120.42, 118.03. HRMS (ESI) calcd for  $\text{C}_{31}\text{H}_{22}\text{O}_2\text{Na}$   $[\text{M} + \text{Na}]^+$ : 449.1512, found: 449.1513.

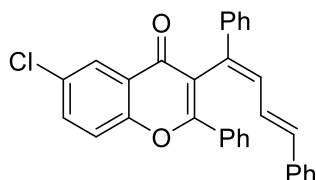

**6-chloro-3-((1Z,3E)-1,4-diphenylbuta-1,3-dien-1-yl)-2-phenyl-4H-chromen-4-one (5b)**

Following the general procedure, the crude product was purified by column chromatography (PE/EA = 10:1:1, v/v) to provide the title compound as a yellow solid (71.3 mg, 52% yield) m.p. 195 - 197 °C.  $^1\text{H}$  NMR (500 MHz,  $\text{CDCl}_3$ )  $\delta$  8.25 - 8.23 (m, 1H), 7.67 - 7.65 (m, 3H), 7.56 - 7.54 (m, 1H), 7.41 - 7.39 (m, 2H), 7.34 - 7.31 (m, 1H), 7.30 - 7.16 (m, 10H), 6.96 (d,  $J = 15.0$  Hz, 1H), 6.70 - 6.61 (m, 2H).  $^{13}\text{C}$  NMR (125 MHz,  $\text{CDCl}_3$ )  $\delta$  175.89, 162.78, 154.56, 139.89, 137.11, 135.48, 134.00, 133.15, 132.65, 131.22, 131.13, 130.75, 128.54, 128.45, 128.26, 128.17, 127.76, 127.52, 126.56, 125.88, 125.84, 125.69, 124.09, 120.46, 119.82. HRMS (ESI) calcd for  $\text{C}_{31}\text{H}_{21}\text{ClO}_2\text{Na}$   $[\text{M} + \text{Na}]^+$ : 483.1122, found: 483.1130.

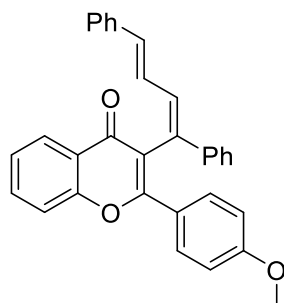

**3-((1Z,3E)-1,4-diphenylbuta-1,3-dien-1-yl)-2-(4-methoxyphenyl)-4H-chromen-4-one (5c)**

Following the general procedure, the crude product was purified by column chromatography (PE/EA = 10:1:1, v/v) to provide the title compound as a yellow solid (56.3 mg, 41% yield) m.p. 82 - 84 °C.  $^1\text{H}$  NMR (500 MHz,  $\text{CDCl}_3$ )  $\delta$  8.28 - 8.26 (m, 1H), 7.75 - 7.70 (m, 3H), 7.60 - 7.58 (m, 1H), 7.47 - 7.42 (m, 3H), 7.29 - 7.24 (m, 4H), 7.24 - 7.20 (m, 3H), 7.18 - 7.14 (m, 1H), 7.01 (d,  $J = 15.0$  Hz, 1H), 6.81 - 6.78 (m, 2H), 6.74 - 6.68 (m, 1H), 6.66 (d,  $J = 15.0$  Hz, 1H), 3.75 (s, 3H).  $^{13}\text{C}$  NMR (125 MHz,  $\text{CDCl}_3$ )  $\delta$  177.00, 162.18, 161.29, 156.15, 140.02, 137.25, 135.14, 134.01, 133.63, 130.86, 129.99, 128.54, 128.41, 127.61, 127.45, 126.56, 126.51, 126.00, 125.88, 125.21, 125.03, 123.10, 119.38, 117.91, 113.68, 55.23. HRMS (ESI) calcd for  $\text{C}_{32}\text{H}_{24}\text{O}_3\text{Na}$   $[\text{M} + \text{Na}]^+$ : 479.1618, found: 479.1628.

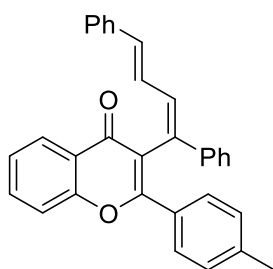

### 3-((1Z,3E)-1,4-diphenylbuta-1,3-dien-1-yl)-2-(p-tolyl)-4H-chromen-4-one (5d)

Following the general procedure, the crude product was purified by column chromatography (PE/EA = 10:1:1, v/v) to provide the title compound as a yellow solid (83.1 mg, 63% yield) m.p. 182 - 184 °C. <sup>1</sup>H NMR (600 MHz, CDCl<sub>3</sub>) δ 8.29-8.27 (m, 1H), 7.74 - 7.70 (m, 1H), 7.62 - 7.57 (m, 3H), 7.46 - 7.42 (m, 3H), 7.28 - 7.19 (m, 7H), 7.17 - 7.13 (m, 1H), 7.09 - 7.07 (m, 2H), 6.98 (d, *J* = 12.0 Hz, 1H), 6.73 - 6.68 (m, 1H), 6.64 (d, *J* = 18.0 Hz, 1H), 2.28 (s, 3H). <sup>13</sup>C NMR (150 MHz, CDCl<sub>3</sub>) δ 177.04, 162.56, 156.21, 140.93, 140.05, 137.25, 135.10, 133.84, 133.68, 130.86, 130.12, 128.95, 128.50, 128.40, 128.12, 127.59, 127.41, 126.53, 126.49, 125.98, 125.88, 125.07, 123.13, 119.94, 117.98, 21.40. HRMS (ESI) calcd for C<sub>32</sub>H<sub>24</sub>O<sub>2</sub>Na [M + Na]<sup>+</sup>: 463.1669, found: 463.1671.

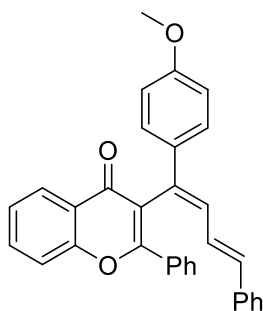

### 3-((1Z,3E)-1-(4-methoxyphenyl)-4-phenylbuta-1,3-dien-1-yl)-2-phenyl-4H-chromen-4-one (5e)

Following the general procedure, the crude product was purified by column chromatography (PE/EA = 10:1:1, v/v) to provide the title compound as a yellow solid (65.2 mg, 48% yield) m.p. 234 - 236 °C. <sup>1</sup>H NMR (500 MHz, CDCl<sub>3</sub>) δ 8.30 - 8.27 (m, 1H), 7.76 - 7.72 (m, 1H), 7.70 - 7.68 (m, 2H), 7.60 (d, *J* = 15.0 Hz, 1H), 7.46 - 7.43 (m, 1H), 7.39 - 7.36 (m, 2H), 7.35 - 7.27 (m, 3H), 7.25 - 7.19 (m, 4H), 7.16 - 7.14 (m, 1H), 6.88 (d, *J* = 15.0 Hz, 1H), 6.82 - 6.79 (m, 2H), 6.71 - 6.64 (m, 1H), 6.58 (d, *J* = 20.0 Hz, 1H), 3.77 (s, 3H). <sup>13</sup>C NMR (125 MHz, CDCl<sub>3</sub>) δ 177.06, 162.38, 159.15, 156.25, 137.38, 134.23, 133.75, 133.22, 133.05, 132.74, 130.52, 129.22, 128.40, 128.20, 128.15, 127.44, 127.09, 126.56, 126.44, 126.06, 125.15, 123.20, 120.47, 118.02, 114.01, 55.22. HRMS (ESI) calcd for C<sub>32</sub>H<sub>24</sub>O<sub>3</sub>Na [M + Na]<sup>+</sup>: 479.1618, found: 479.1625.

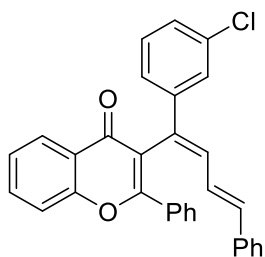

**3-(((1Z,3E)-1-(3-chlorophenyl)-4-phenylbuta-1,3-dien-1-yl)-2-phenyl-4H-chromen-4-one (5f)**

Following the general procedure, the crude product was purified by column chromatography (PE/EA = 10:1:1, v/v) to provide the title compound as a yellow solid (90.3 mg, 65% yield) m.p. 145 - 147 °C. <sup>1</sup>H NMR (500 MHz, CDCl<sub>3</sub>) δ 8.25 - 8.23 (m, 1H), 7.70 - 7.65 (m, 3H), 7.57 - 7.54 (m, 1H), 7.41 - 7.39 (m, 1H), 7.33 - 7.31 (m, 1H), 7.30 - 7.16 (m, 10 H), 6.96 (d, *J* = 15.0 Hz, 1H), 6.70 - 6.62 (m, 2H). <sup>13</sup>C NMR (125 MHz, CDCl<sub>3</sub>) δ 175.89, 162.78, 154.56, 139.89, 137.11, 135.48, 134.00, 133.15, 132.65, 131.22, 131.13, 130.75, 128.54, 128.45, 128.26, 128.17, 127.76, 127.52, 126.56, 125.88, 125.84, 125.69, 124.09, 120.46, 119.82, 77.25, 77.00, 76.75. HRMS (ESI) calcd for C<sub>31</sub>H<sub>21</sub>ClO<sub>2</sub>Na [M + Na]<sup>+</sup>: 483.1122, found: 483.1136.

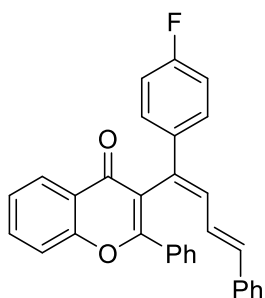

**3-(((1Z,3E)-1-(4-fluorophenyl)-4-phenylbuta-1,3-dien-1-yl)-2-phenyl-4H-chromen-4-one (5g)**

Following the general procedure, the crude product was purified by column chromatography (PE/EA = 10:1:1, v/v) to provide the title compound as a yellow solid (84.5 mg, 63% yield) m.p. 184 - 186 °C. <sup>1</sup>H NMR (500 MHz, CDCl<sub>3</sub>) δ 8.30 - 8.27 (m, 1H), 7.78 - 7.73 (m, 1H), 7.67 - 7.64 (m, 2H), 7.66 (d, *J* = 15.0 Hz, 1H), 7.49 - 7.45 (m, 1H), 7.40 - 7.33 (m, 3H), 7.31 - 7.21 (m, 6H), 7.19 - 7.15 (m, 1H), 6.96 - 6.92 (m, 2H), 6.90 (d, *J* = 15.0 Hz, 1H), 6.72 - 6.65 (m, 1H), 6.63 (d, *J* = 20.0 Hz, 1H). <sup>13</sup>C NMR (125 MHz, CDCl<sub>3</sub>) δ 176.96, 162.69, 162.22 (*J* = 246.3 Hz), 156.22, 137.09, 136.34 (*J* = 5.00 Hz), 135.31, 133.89, 132.89, 132.48, 131.00, 130.65, 128.44, 128.25, 128.12, 127.48 (*J* = 8.75 Hz), 127.45, 126.56, 126.52, 125.75, 125.28, 123.12, 120.25, 118.06, 115.43 (*J* = 22.5 Hz). HRMS (ESI) calcd for C<sub>31</sub>H<sub>21</sub>FO<sub>2</sub>Na [M + Na]<sup>+</sup>: 467.1418, found: 467.1429.

#### 4.4 Further transformations of **3y**

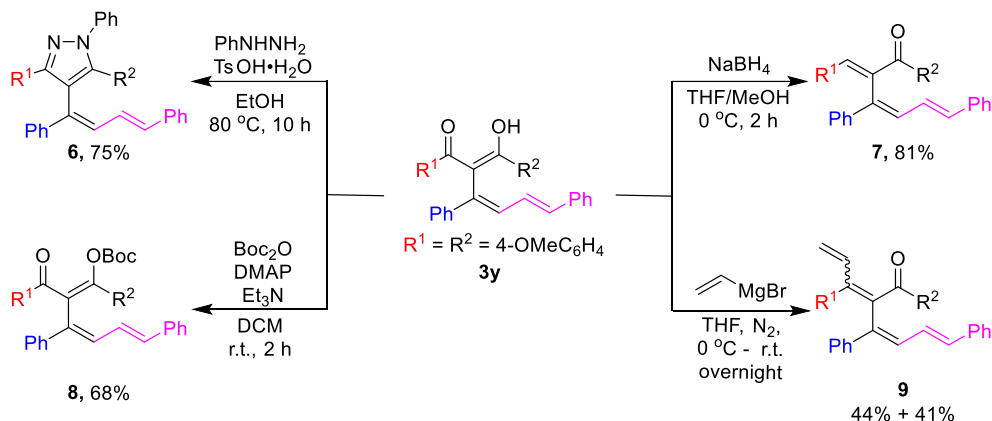

Procedure for preparation of **6**<sup>13</sup>: To an oven-dried 10 mL sealed tube charged with a PTFE-coated magnetic stirring bar, **3y** (0.2 mmol, 1.0 equiv., 97.7 mg), *p*-toluenesulfonic acid monohydrate (0.6 mmol, 30 mol%, 11.4 mg), and phenylhydrazine (2.0 mmol, 10.0 equiv., 216.3 mg) are diluted in 2 mL ethanol and stirred at 80 °C. Upon the completion of reaction monitored by TLC, the reaction was quenched with water, and the aqueous layer was extracted with ethyl acetate (3x10 mL). The combined organic layers were washed with brine (10 mL), dried over MgSO<sub>4</sub>, and concentrated under reduced pressure the pure product was isolated by column chromatography on silica gel (PE: EA = 15: 1, v: v) as white solid. (83.6 mg, 75%).

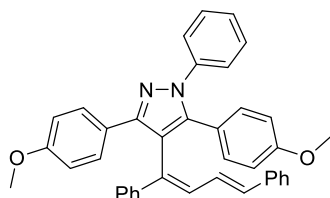

<sup>1</sup>H NMR (500 MHz, CDCl<sub>3</sub>) δ 7.76 - 7.74 (m, 2H), 7.43 - 7.40 (m, 4H), 7.33 - 7.30 (m, 2H), 7.25 - 7.18 (m, 7H), 7.14 - 7.12 (m, 2H), 7.00 - 6.96 (m, 3H), 6.86 - 6.81 (m, 1H), 6.77 - 6.75 (m, 2H), 6.62 - 6.657 (m, 3H), 3.68 (s, 3H), 3.61 (s, 3H). <sup>13</sup>C NMR (125 MHz, CDCl<sub>3</sub>) δ 159.24, 159.16, 150.37, 142.19, 140.89, 140.10, 137.37, 134.06, 130.87, 130.63, 128.71, 128.43, 128.33, 128.29, 127.47, 127.26, 127.22, 126.80, 126.47, 126.36, 125.79, 124.78, 122.45, 116.66, 113.65, 113.63, 55.02, 54.94. m.p. 74 - 76 °C HRMS (ESI) calcd for C<sub>39</sub>H<sub>33</sub>N<sub>2</sub>O<sub>2</sub> [M + H]<sup>+</sup>: 561.2537, found: 561.2542

Procedure for preparation of **8**<sup>14</sup>: To an oven-dried 10 mL sealed tube charged with a PTFE-coated magnetic stirring bar, **3y** (0.2 mmol, 1.0 equiv., 97.7 mg), DMAP (0.02 mmol, 10 mol%, 2.4 mg) and Et<sub>3</sub>N (0.22 mmol, 1.1 equiv., 22.3 mg) are diluted in 2 mL DCM. Boc<sub>2</sub>O (0.3 mmol, 1.5 equiv., 65.5 mg) was added to the reaction vessel, and the reaction was stirred for 2 h at room temperature. Upon the completion of reaction monitored by TLC, the solution was transferred to a separatory funnel, and NaHSO<sub>4</sub> (0.5 M, 10 mL) was added. The layers were separated, and the aqueous layer was extracted with CH<sub>2</sub>Cl<sub>2</sub> (3x10 mL). The combined organic layers were washed with

brine (10 mL), dried over MgSO<sub>4</sub>, and concentrated under reduced pressure, the pure product was isolated by column chromatography on silica gel (PE: EA = 12: 1, v: v) as yellow solid. (80.6 mg, 68%)

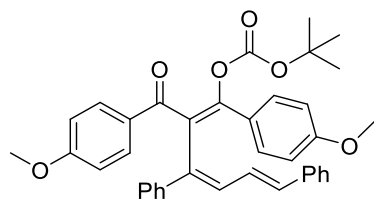

**<sup>1</sup>H NMR** (500 MHz, CDCl<sub>3</sub>) δ 7.99 - 7.97 (m, 2H), 7.55 - 7.53 (m, 2H), 7.46 - 7.44 (m, 2H), 7.29 - 7.23 (m, 6H), 7.20 - 7.17 (m, 3H), 6.86 - 6.85 (m, 2H), 6.69 - 6.63 (m, 3H), 6.54 (d, *J* = 20.0 Hz, 1H), 3.79 (s, 3H), 3.66 (s, 3H), 1.34 (s, 9H). **<sup>13</sup>C NMR** (125 MHz, CDCl<sub>3</sub>) δ 192.96, 163.12, 160.40, 151.46, 150.29, 139.88, 137.33, 137.12, 135.23, 131.46, 131.19, 130.64, 129.13, 128.43, 128.41, 127.64, 127.54, 126.93, 126.75, 126.58, 126.56, 125.72, 113.56, 113.44, 83.65, 55.33, 55.06, 27.42. m.p. 69 - 71 °C HRMS (ESI) calcd for C<sub>38</sub>H<sub>36</sub>O<sub>6</sub>Na [M + Na]<sup>+</sup>: 611.2404, found: 611.2408

Procedure for preparation of **7**<sup>15</sup>: To an oven-dried 10 mL Schlenk tube charged with a PTFE-coated magnetic stirring bar, **3y** (0.2 mmol, 1.0 equiv., 97.7 mg) are diluted in dry THF and methanol (THF: MeOH=1:1, v: v) at 0 °C. NaBH<sub>4</sub> (0.6 mmol, 3.0 equiv., 22.7 mg) was added to the reaction vessel, and the reaction was stirred for 2 h at room temperature under N<sub>2</sub> atmosphere. Upon the completion of reaction monitored by TLC, and the reaction was quenched with water, and the aqueous layer was extracted with ethyl acetate (3x10 mL). The combined organic layers were washed with brine (10 mL), dried over MgSO<sub>4</sub>, and concentrated under reduced pressure, the pure product was isolated by column chromatography on silica gel (PE: EA = 9: 1, v: v) as white solid. (76.6 mg, 81%)

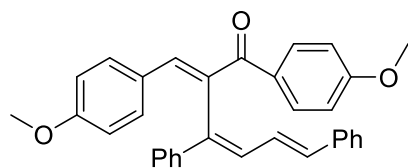

**<sup>1</sup>H NMR** (500 MHz, CDCl<sub>3</sub>) δ 7.89 - 7.87 (m, 2H), 7.54 - 7.50 (m, 5H), 7.28 - 7.12 (m, 8H), 6.99 - 6.90 (m, 4H), 6.73 - 6.67 (m, 3H), 3.81 (s, 3H), 3.67 (s, 3H). **<sup>13</sup>C NMR** (125 MHz, CDCl<sub>3</sub>) δ 195.57, 162.62, 160.56, 142.62, 139.14, 138.04, 137.32, 135.40, 134.94, 131.87, 131.76, 131.01, 129.81, 128.60, 128.41, 127.60, 127.56, 127.21, 126.49, 126.47, 126.15, 113.94, 113.41, 55.34, 55.09. m.p. 71 - 73 °C HRMS (ESI) calcd for C<sub>33</sub>H<sub>29</sub>O<sub>3</sub> [M + H]<sup>+</sup>: 473.2111, found: 473.2116

Procedure for preparation of **9**<sup>16</sup>: To an oven-dried 10 mL sealed tube charged with a PTFE-coated magnetic stirring bar, **3y** (0.2 mmol, 1.0 equiv., 97.7 mg) are diluted in 2 mL dry THF at 0 °C. Vinylmagnesium bromide solution (0.1 M in THF, 8 mL, 0.8 mmol) was added dropwise and the reaction mixture was slowly allowed to reach room temperature overnight. Upon the completion of reaction monitored by TLC, the reaction

was quenched with Sat. NH<sub>4</sub>Cl-solution (10 mL), and the aqueous layer was extracted with ethyl acetate (3x10 mL). The combined organic layers were washed with brine (10 mL), dried over MgSO<sub>4</sub>, and concentrated under reduced pressure, the pure product was isolated by column chromatography on silica gel (PE: EA = 15: 1, v: v) as white solid. (**9** (isomer 1): 44.0 mg, 44%, **9** (isomer 2): 40.4 mg, 41%).

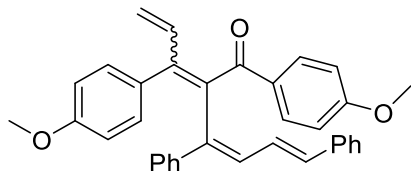

**9** (isomer 1) <sup>1</sup>H NMR (500 MHz, CDCl<sub>3</sub>) δ 8.00 - 7.98 (m, 2H), 7.35 - 7.32 (m, 2H), 7.29 - 7.21 (m, 5H), 7.19 - 7.10 (m, 6H), 6.89 - 6.78 (m, 3H), 6.64-6.62 (m, 2H), 6.48 - 6.39 (m, 2H), 5.30 (dd, *J* = 10.7, 1.5 Hz, 1H), 5.16 (dd, *J* = 17.1, 1.5 Hz, 1H), 3.82 (s, 3H), 3.66 (s, 3H). <sup>13</sup>C NMR (125 MHz, CDCl<sub>3</sub>) δ 196.13, 163.45, 159.08, 147.04, 141.02, 140.33, 137.94, 137.38, 136.99, 134.56, 131.99, 131.05, 130.77, 130.30, 130.08, 128.53, 127.96, 127.64, 127.44, 127.15, 126.96, 126.53, 121.35, 113.64, 113.03, 55.41, 55.07. m.p. 82 - 84 °C HRMS (ESI) calcd for C<sub>35</sub>H<sub>31</sub>O<sub>3</sub> [M + H]<sup>+</sup>: 499.2268, found: 499.2273

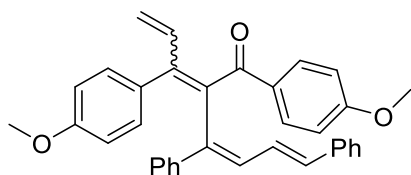

**9** (isomer 2) <sup>1</sup>H NMR (500 MHz, CDCl<sub>3</sub>) δ 7.71 - 6.69 (m, 2H), 7.50 - 7.48 (m, 2H), 7.37 - 7.35 (m, 2H), 7.30 - 7.26 (m, 4H), 7.25 - 7.20 (m, 5H), 6.91 - 6.83 (m, 2H), 6.80 - 6.73 (m, 3H), 6.66 - 6.64 (m, 2H), 5.36 (dd, *J* = 10.7, 1.4 Hz, 1H), 5.21 (dd, *J* = 17.2, 1.5 Hz, 1H), 3.73 (s, 3H), 3.72 (s, 3H). <sup>13</sup>C NMR (125 MHz, CDCl<sub>3</sub>) δ 195.77, 162.71, 159.33, 145.57, 140.12, 138.94, 137.88, 137.54, 137.29, 135.30, 132.14, 131.72, 131.69, 130.33, 130.09, 128.62, 128.35, 127.78, 127.61, 127.24, 127.12, 126.51, 122.14, 113.50, 113.04, 55.25, 55.11. m.p. 81 - 83 °C HRMS (ESI) calcd for C<sub>35</sub>H<sub>31</sub>O<sub>3</sub> [M + H]<sup>+</sup>: 499.2268, found: 499.2269

#### 4.5 Synthesis of 10

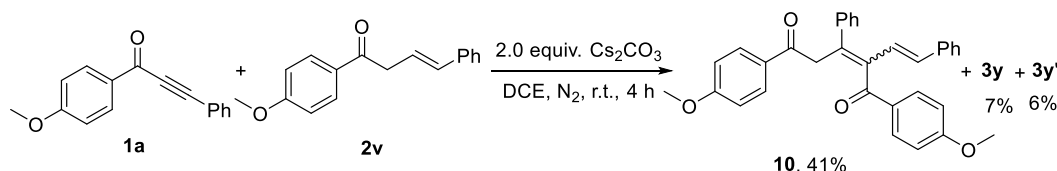

To an oven-dried 10 mL Schlenk tube charged with a PTFE-coated magnetic stirring bar, **1a** (0.3 mmol, 1.0 equiv., 70.9 mg), **2v** (0.36 mmol, 1.2 equiv., 90.8 mg) and Cs<sub>2</sub>CO<sub>3</sub> (0.6 mmol, 2.0 equiv., 195.5 mg) are diluted in dry DCE and the reaction was stirred for 4 h at room temperature under N<sub>2</sub> atmosphere. Upon the completion of

reaction monitored by TLC, and the reaction was quenched with water, and the aqueous layer was extracted with ethyl acetate (3x10 mL). The combined organic layers were washed with brine (10 mL), dried over MgSO<sub>4</sub>, and concentrated under reduced pressure, the pure product was isolated by column chromatography on silica gel (PE: EA = 8: 1, v: v) as yellow solid. (60.5 mg, 41%)

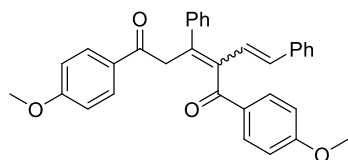

**<sup>1</sup>H NMR (600 MHz, CDCl<sub>3</sub>)** Obtained as 1.5: 1 isomer. major isomer:  $\delta$  8.11 - 8.09 (m, 3H), 7.75 - 7.73 (m, 2H), 7.43 - 7.37 (m, 4H), 6.94 - 6.92 (m, 3H), 6.83 - 6.80 (m, 3H), 6.27 (d,  $J$  = 18 Hz, 1H) 4.05 (s, 2H), 3.85 (s, 3H), 3.80 (s, 3H); minor isomer  $\delta$  8.06 - 8.04 (m, 2H), 6.99 - 6.96 (m, 3H), 6.48 (d,  $J$  = 18 Hz, 1H), 4.40 (s, 2H), 3.90 (s, 3H), 3.79 (s, 3H); other peaks are overlapped with the other isomer. **<sup>13</sup>C NMR (150 MHz, CDCl<sub>3</sub>)**  $\delta$  198.00, 197.59, 195.28, 194.69, 164.20, 163.85, 163.55, 163.35, 141.63, 140.08, 139.79, 139.64, 136.93, 136.00, 134.21, 133.64, 132.51, 132.45, 132.30, 130.68, 130.35, 129.91, 129.74, 129.59, 129.50, 129.34, 128.44, 128.23, 128.12, 128.00, 127.93, 127.74, 127.71, 127.37, 126.66, 126.48, 125.30, 123.88, 113.95, 113.60, 113.51, 55.55, 55.48, 55.39, 55.32, 45.27, 44.04. m.p. 185 - 187 °C HRMS (ESI) calcd for C<sub>33</sub>H<sub>28</sub>O<sub>4</sub>Na [M + Na]<sup>+</sup>: 511.1880, found: 511.1875.

#### 4.6 Synthesis of **3y'**

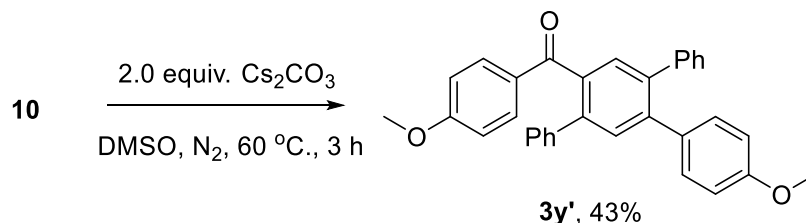

To an oven-dried 10 mL Schlenk tube charged with a PTFE-coated magnetic stirring bar, **10** (0.1 mmol, 1.0 equiv., 48.9 mg) and Cs<sub>2</sub>CO<sub>3</sub> (0.2 mmol, 2.0 equiv., 65.2 mg) are diluted in dry DMSO and the reaction was stirred for 3 h at 60 °C under N<sub>2</sub> atmosphere. Upon the completion of reaction monitored by TLC, and the reaction was quenched with water, and the aqueous layer was extracted with ethyl acetate (3x10 mL). The combined organic layers were washed with brine (10 mL), dried over MgSO<sub>4</sub>, and concentrated under reduced pressure, the pure product was isolated by column chromatography on silica gel (PE: EA = 15: 1, v: v) as **3y'**. (20.2 mg, 43%)

## 5. References

- [1] Wang, M.; Yang Y.; Song B.; Yin L.; Yan S.; Li Y. Selective Insertion of Alkynes into C–C  $\sigma$  Bonds of Indolin-2-ones: Transition-Metal-Free Ring Expansion Reactions to Seven-Membered-Ring Benzolactams or Chromone Derivatives. *Org. Lett.* **2020**, *22*, 155-159
- [2] Yuan, Y.; Tan, H.; Kong, L.; Zheng, Z.; Xu, M.; Huang, J.; Li, Y. Transition-metal-free C–C  $\sigma$ -bond activation of  $\alpha$ -aryl ketones and subsequent Zn-catalyzed intramolecular cyclization: synthesis of tetrasubstituted furans. *Org. Biomol. Chem.* **2019**, *17*, 2725-2733.
- [3] Wang, M.; Kong, L.; Wang, Y.; Song, B.; Sun, Y.; Tang, R.; Li, Y.; Sequential C–C  $\sigma$ -Bond Cleavage/(sp<sup>2</sup>) C–O Bond Formation via C–H Functionalization toward Pyranoindolones Fused with Medium-Sized Ring. *Org. Lett.* **2018**, *20*, 6130-6134.
- [4] Cox, R. J.; Ritson, D. J.; Dane, T. A.; Berge, J.; Charmant, J. P.; Kantacha, A., Room temperature palladium catalysed coupling of acyl chlorides with terminal alkynes. *Chem Commun.* **2005**, *8*, 1037-1039.
- [5] Chan, K. H.; Leong, W. K.; Jaouen, G.; Leclercq, L.; Top, S.; Vessi  res, A., Organometallic cluster analogues of tamoxifen: Synthesis and biochemical assay. *J. Organomet. Chem.* **2006**, *691*, 9-19.
- [6] He, H.; Yin, W.; He, H.; Zhang, Y.; Luo, D., A Highly Active CuI/TMEDA Catalytic System for the Coupling Reaction of Acid Chlorides with Terminal Alkynes under Solvent-Free Conditions. *Synthesis* **2014**, *46*, 2617-2621.
- [7] Oshimoto, K.; Tsuji, H.; Kawatsura, M., Synthesis of benzoxazoles via the copper-catalyzed hydroamination of alkynones with 2-aminophenols. *Org. Biomol. Chem.* **2019**, *17*, 4225-4229.
- [8] Zhang, F.; Yao, Q.; Yuan, Y.; Xu, M.; Kong, L.; Li Y. Base-mediated insertion reaction of alkynes into carbon-carbon sigma-bonds of ethanones: synthesis of hydroxydienone and chromone derivatives, *Org. Biomol. Chem.*, **2017**, *15*, 2497-2500.
- [9] Kong, X.; Song, J.; Liu, J.; Meng, M.; Yang, S.; Zeng, M.; Zhan, X.; Li, C.; Fang, X., Bronsted base-catalyzed annulation of allyl ketones and alkynyl 1,2-diketones. *Chem Commun.* **2018**, *54*, 4266-4269.
- [10] Shabalin, D. A.; Ivanova, E. V.; Ushakov, I. A.; Schmidt, E. Y.; Trofimov, B. A., Regioselective Synthesis of 2-Acylbutadienes from beta, gamma-Unsaturated Ketones. *Synthesis-Stuttgart* **2019**, *51*, 3825-3833.
- [11] Akula, P. S.; Hong, B.-C.; Lee, G.-H., Catalyst- and Substituent-Controlled Switching of Chemoselectivity for the Enantioselective Synthesis of Fully Substituted Cyclobutane Derivatives via 2+2 Annulation of Vinylogous Ketone Enolates and Nitroalkene. *Org. Lett.* **2018**, *20*, 7835-7839.
- [12] Zhang, H.; He, J.; Chen, Y.; Zhuang, C.; Jiang, C.; Xiao, K.; Su, Z.; Ren, X.; Wang, T., Regio- and Stereoselective Cascade of beta, gamma-Unsaturated Ketones by Dipeptided Phosphonium Salt Catalysis: Stereospecific Construction of Dihydrofuro-Fused [2,3-b] Skeletons. *Angew. Chem. Int. Ed. Engl.* **2021**, *60*, 19860-19870.
- [13] K  hling, P.; Schmidt, M.-A.; Eilbracht, P., Tandem Hydroformylation/Fischer

Indole Synthesis: A Novel and Convenient Approach to Indoles from Olefins. *Org. Lett.* **2003**, *5*, 3213-3216.

[14] Quasdorf, W.-K.; Riener M.; Petrova, V.-K.; Garg K.-N., Suzuki–Miyaura Coupling of Aryl Carbamates, Carbonates, and Sulfamates. *J. Am. Chem. Soc.* **2009**, *131*, 17748–17749.

[15] Zhou, X.; Zhang, G.; Huang, R.; Huang, H., Palladium-Catalyzed Allyl–Allyl Reductive Coupling of Allylamines or Allylic Alcohols with H<sub>2</sub> as Sole Reductant. *Org. Lett.* **2021**, *23*, 365-369.

[16] Zhu, S.; Lu, X; Luo, Y.; Zhang, W.; Jiang, H.; Yan, M.; Zeng, W., Ruthenium(II)-Catalyzed Regioselective Reductive Coupling of  $\alpha$ -Imino Esters with Dienes. *Org. Lett.* **2013**, *15*, 1440-1443.

## 6. Copies of NMR spectra

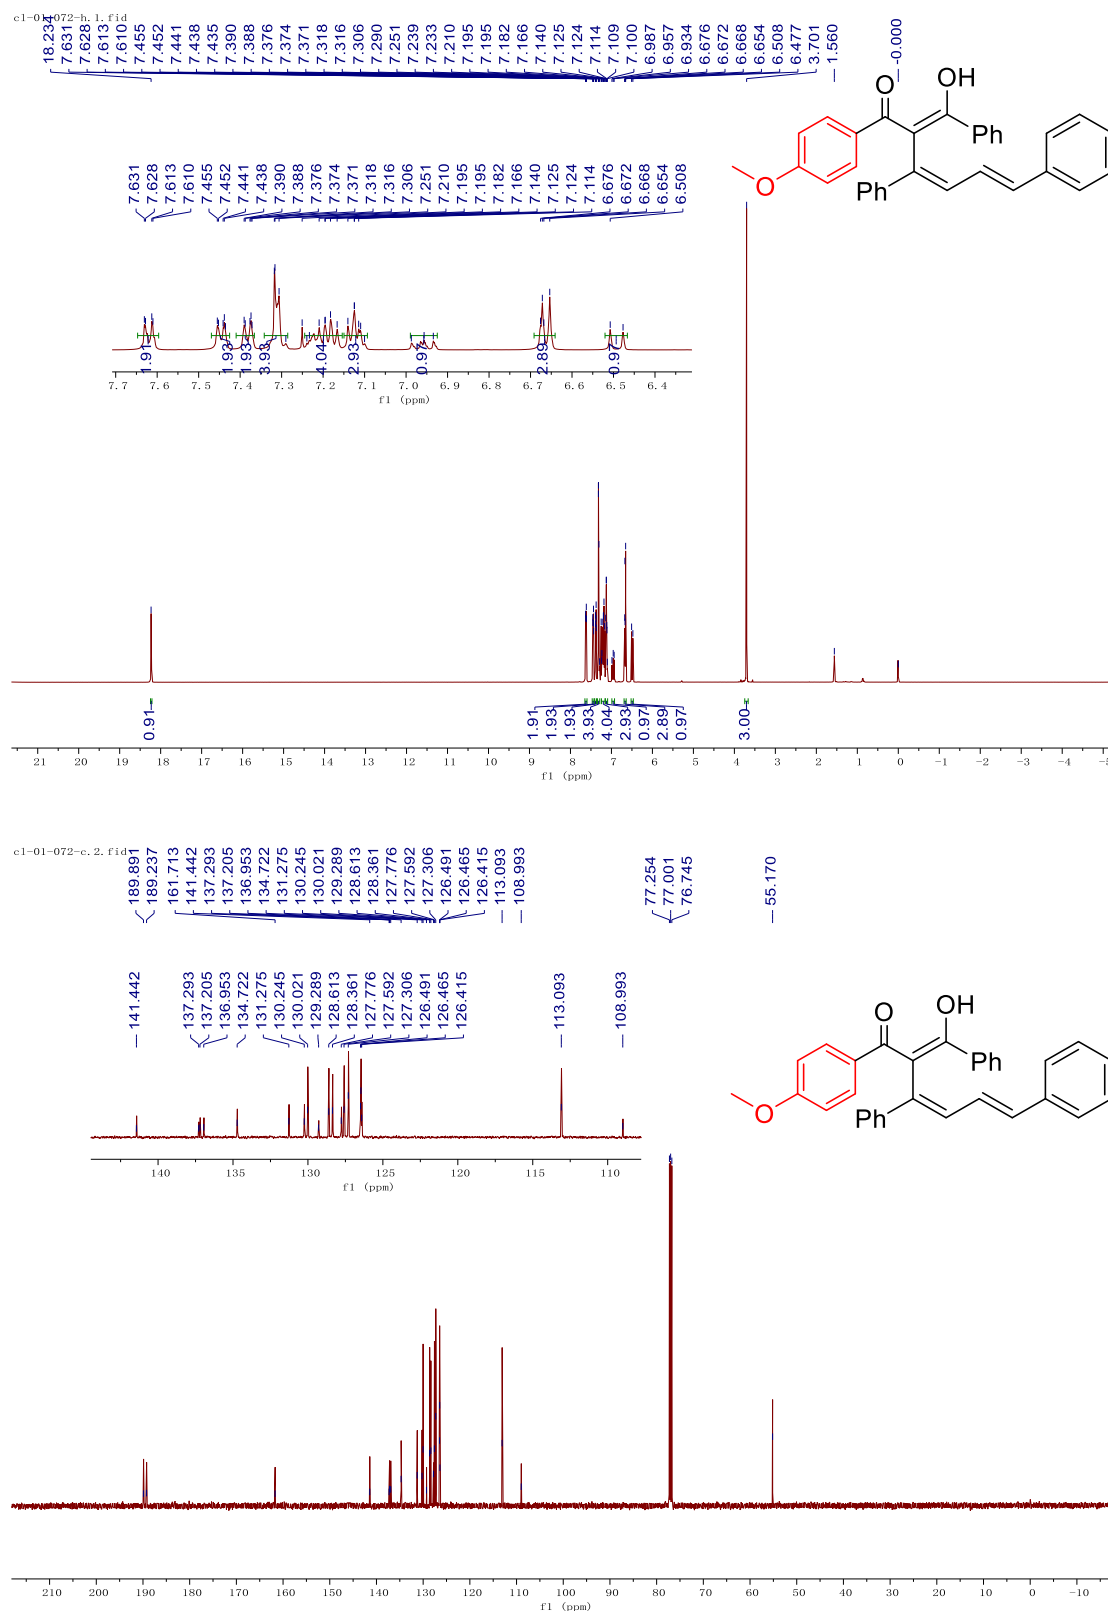

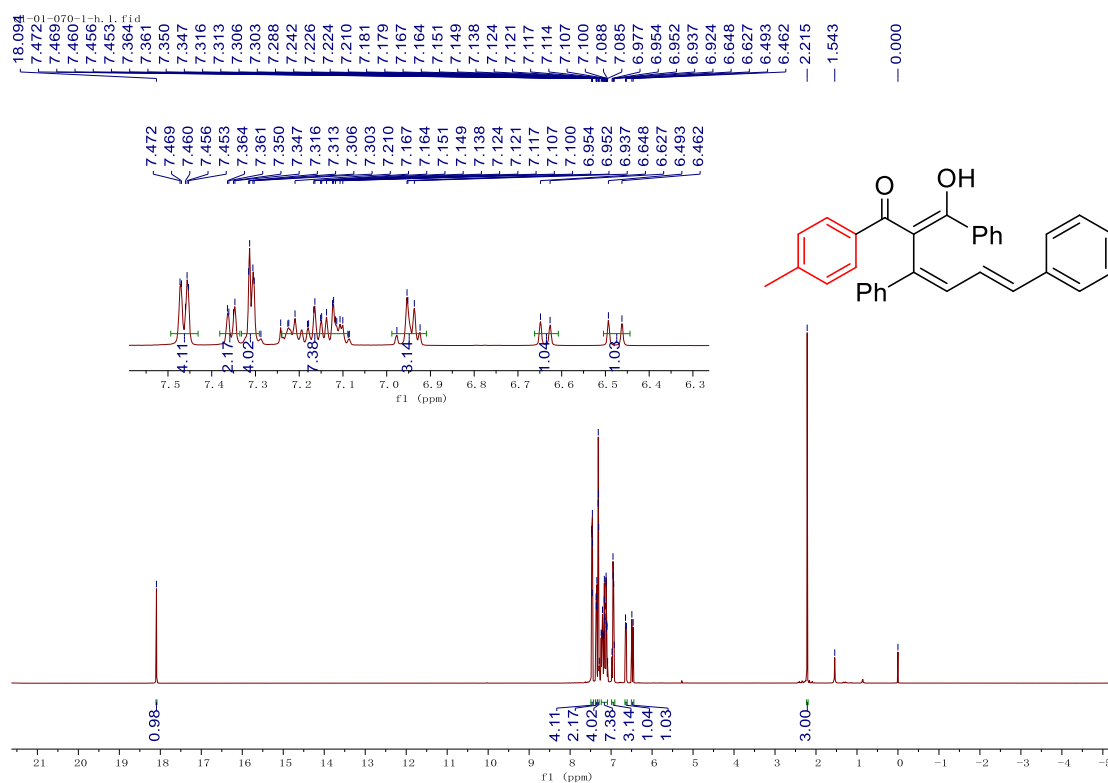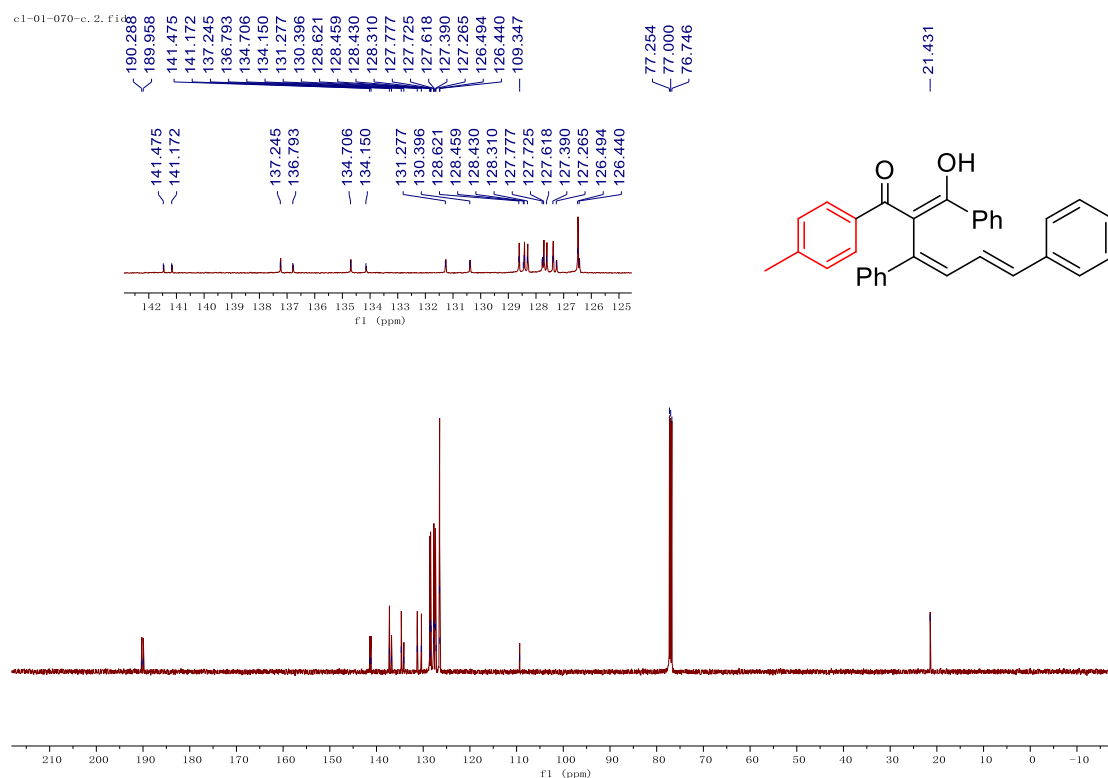

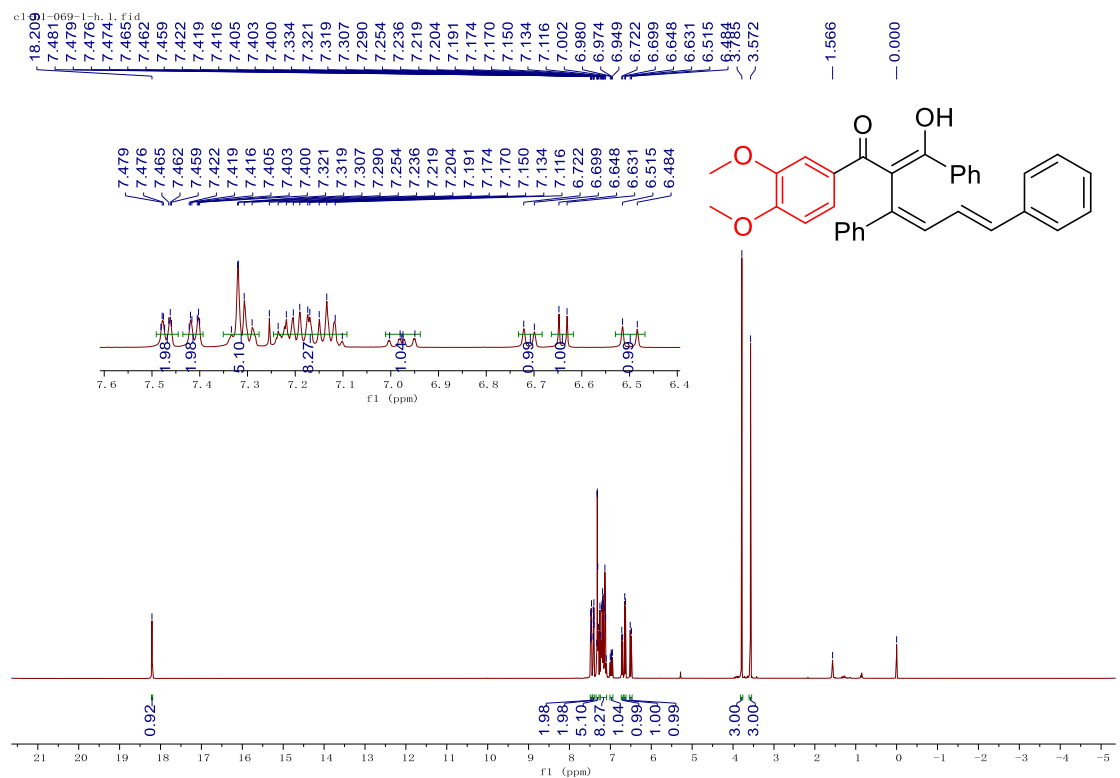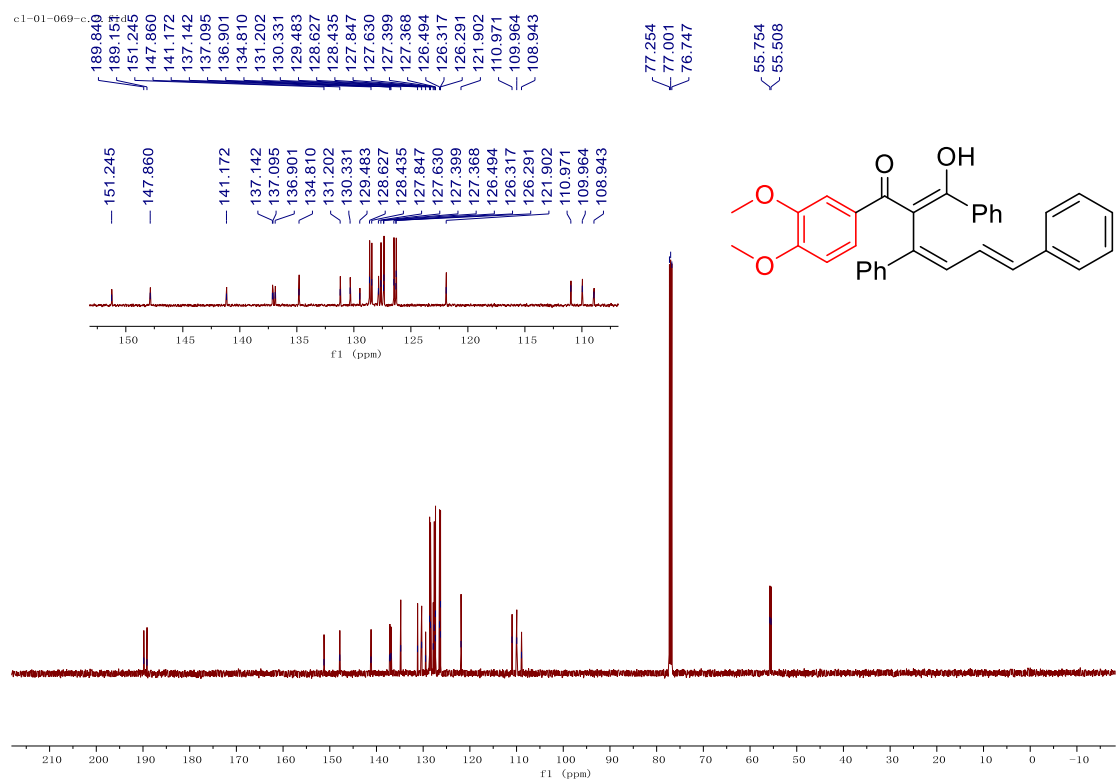

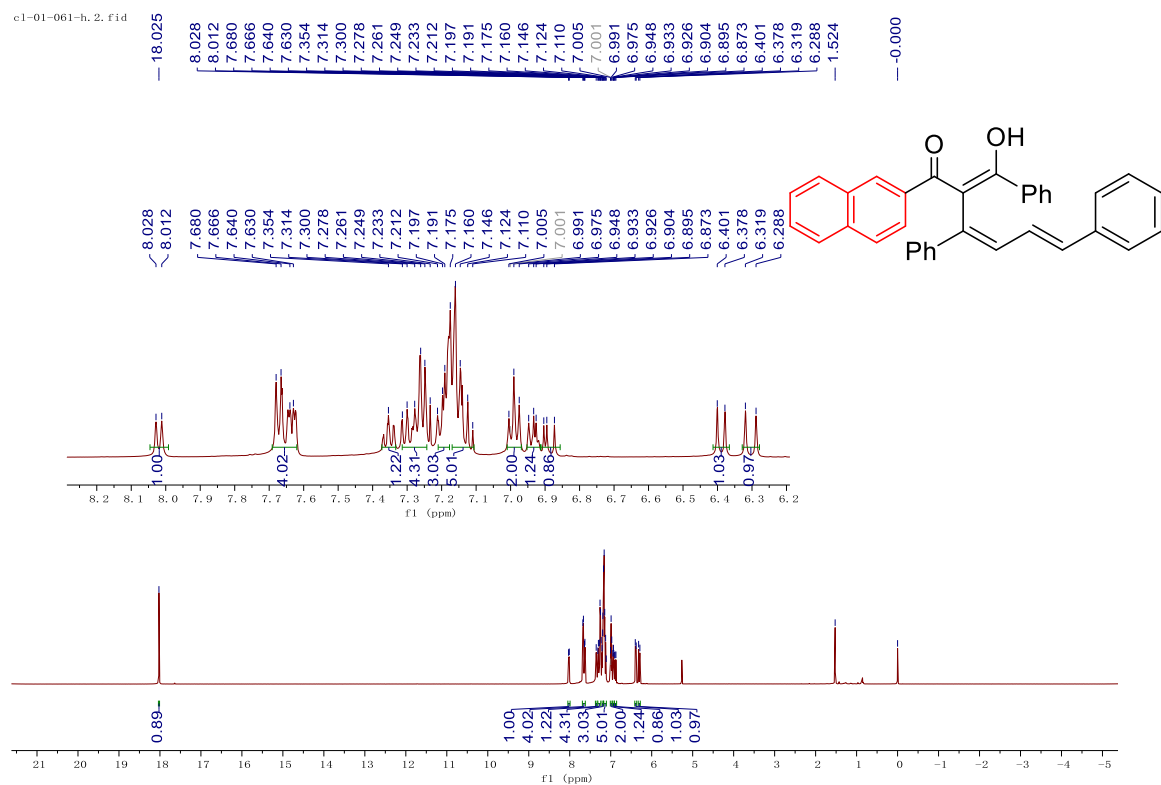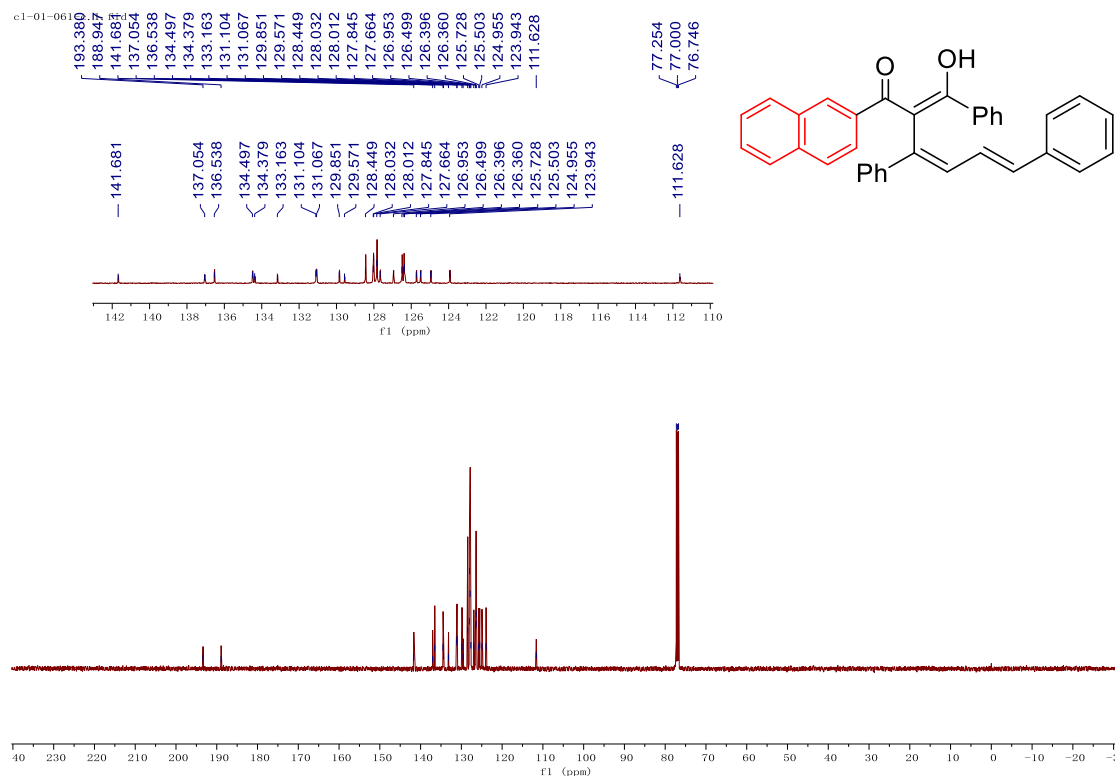

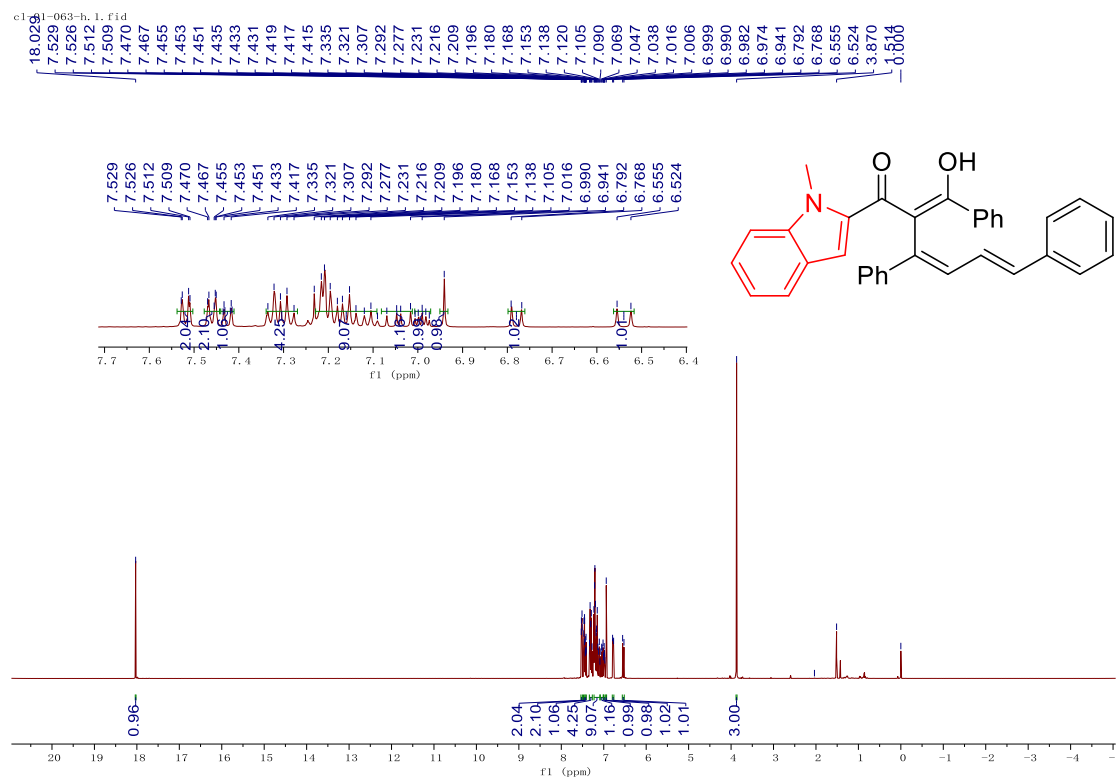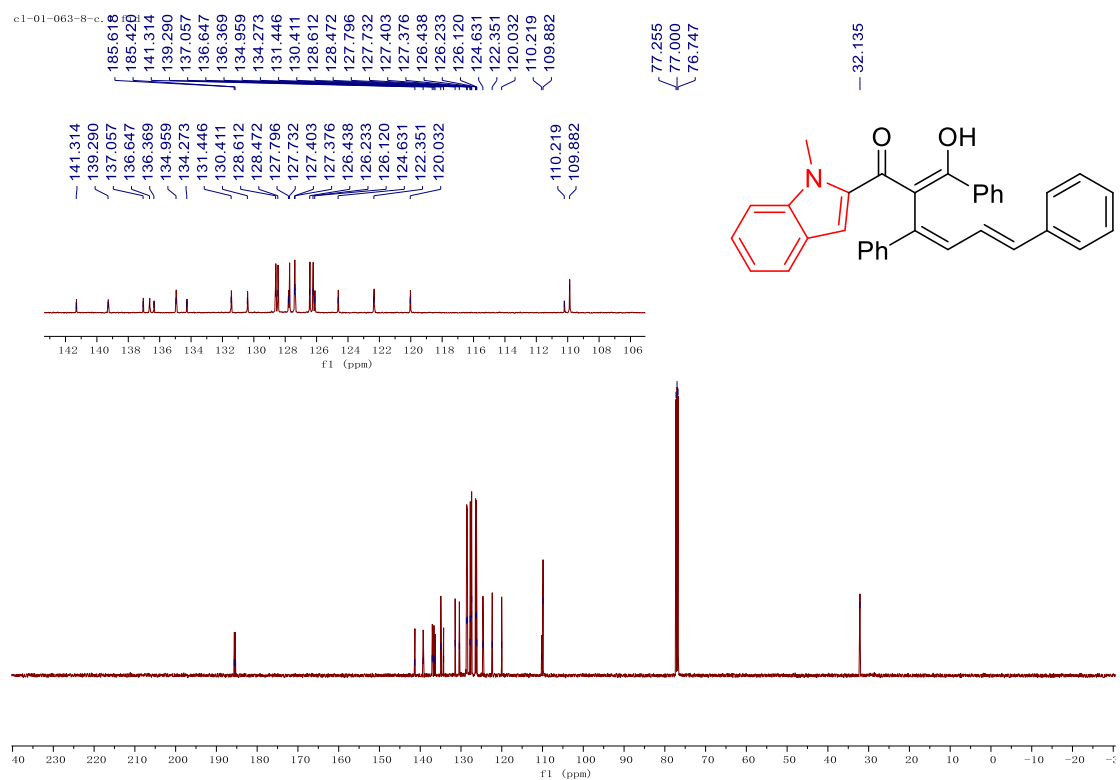

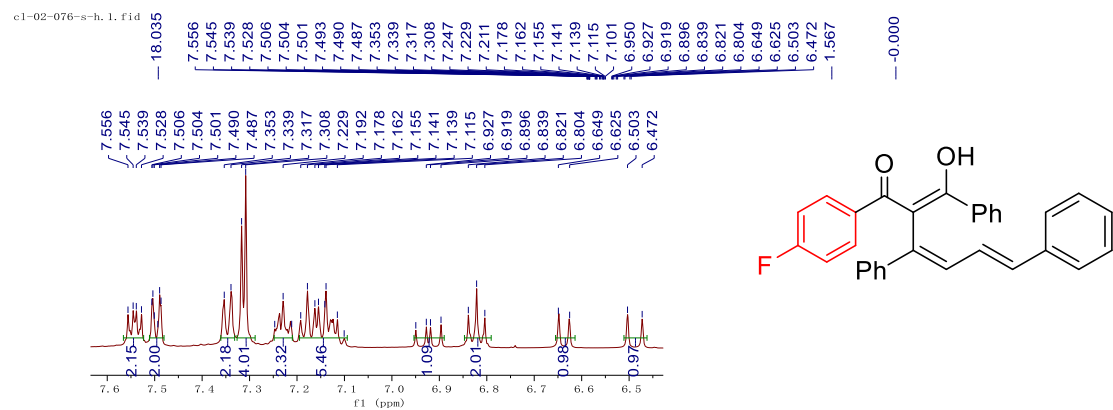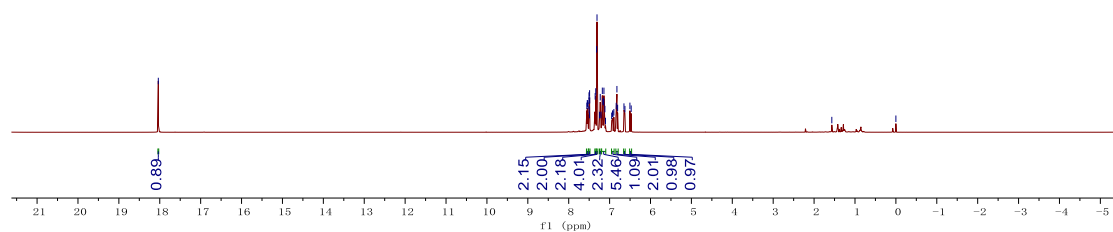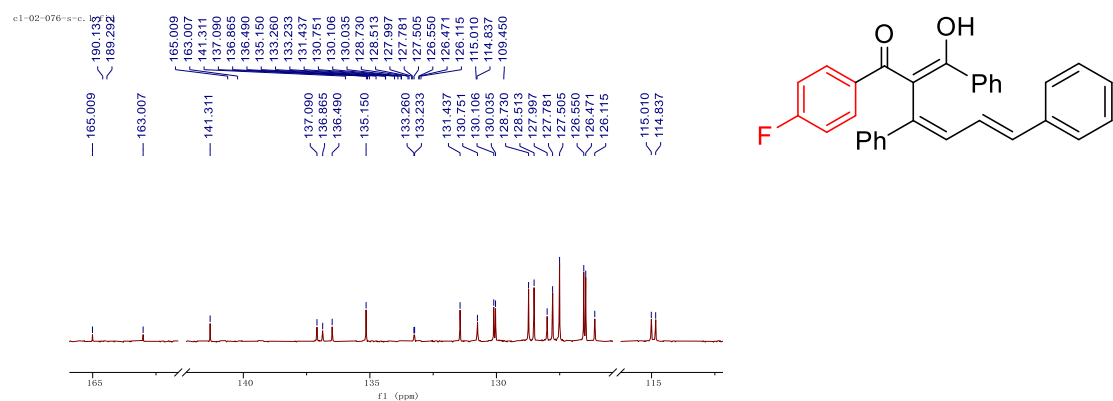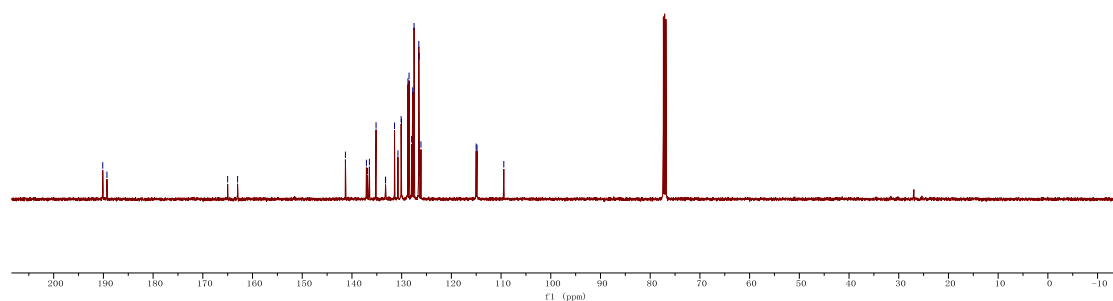

cl-02-076-x-h, 1, f1d

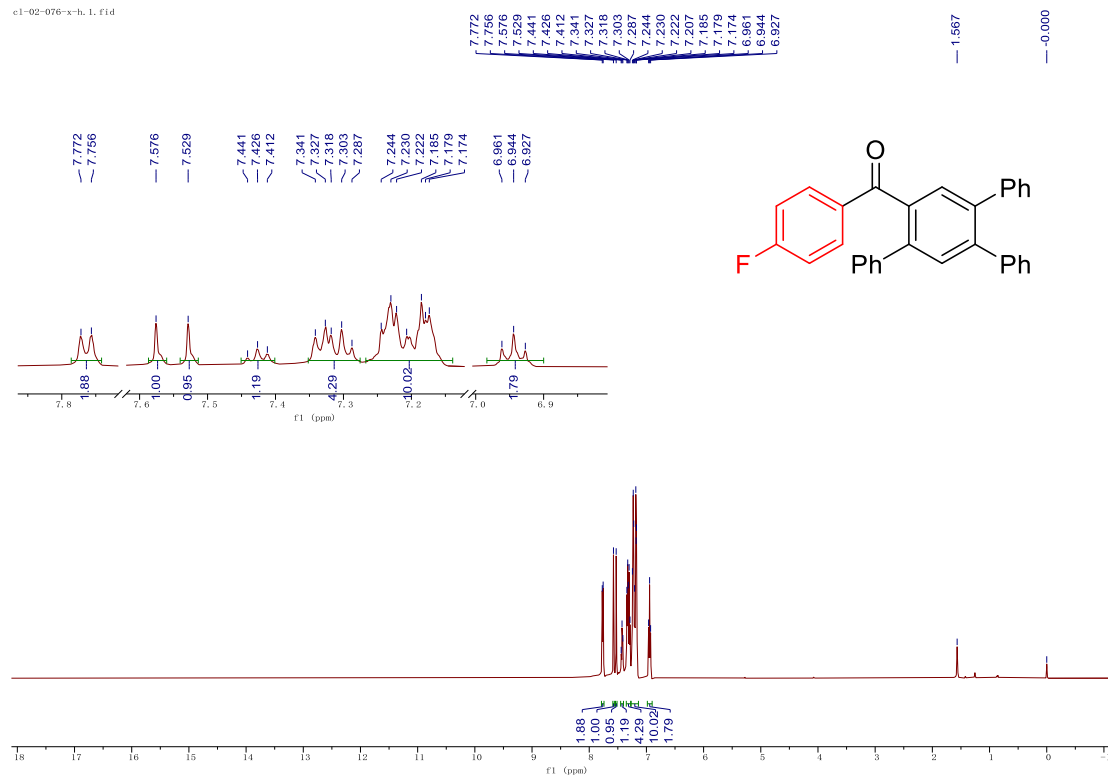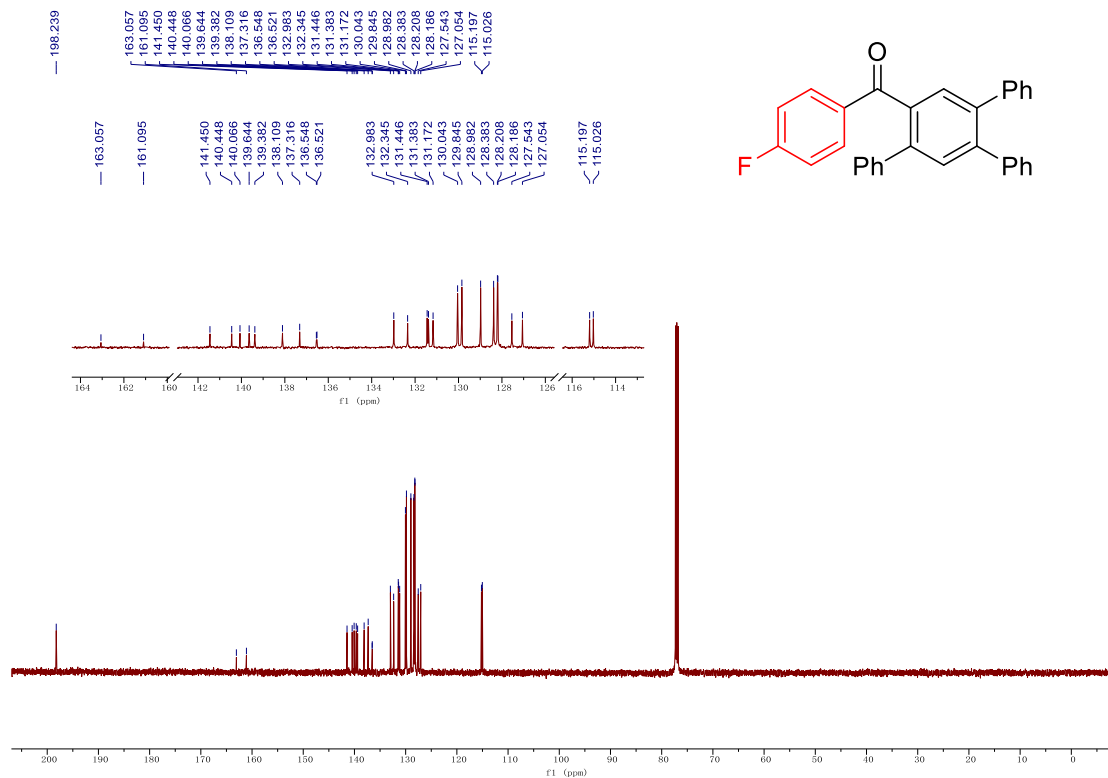

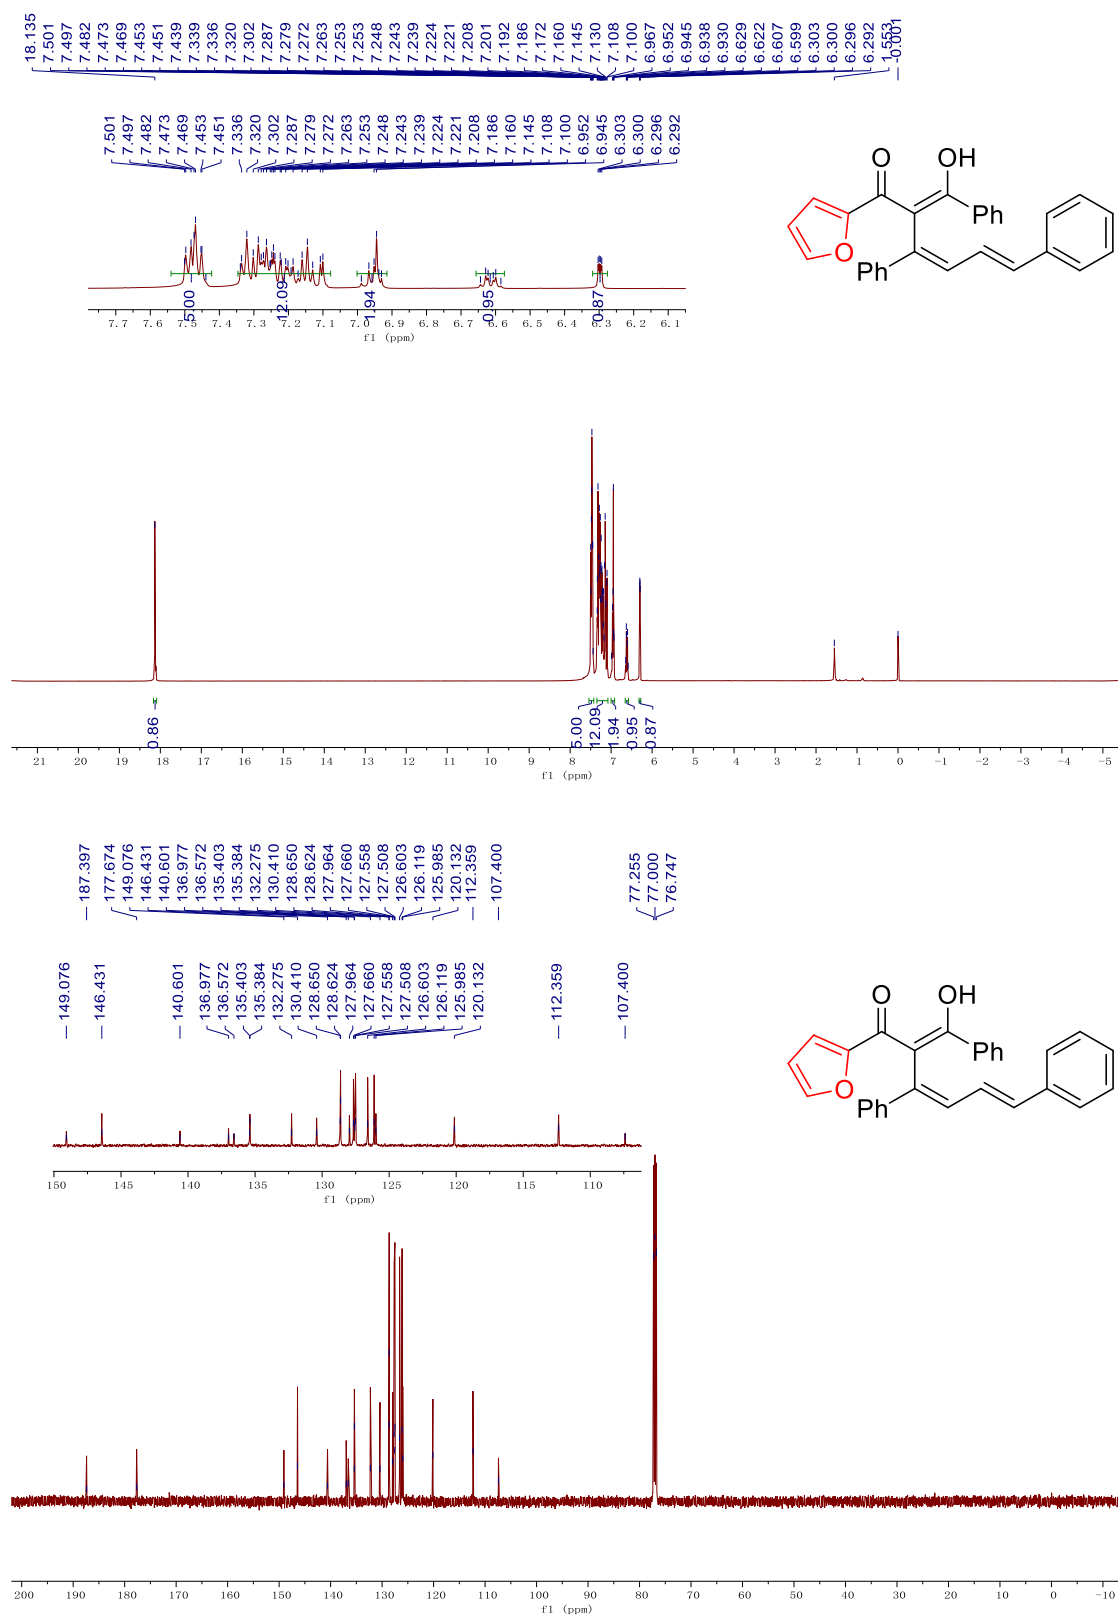

c1-03-060-h, 1, f1d

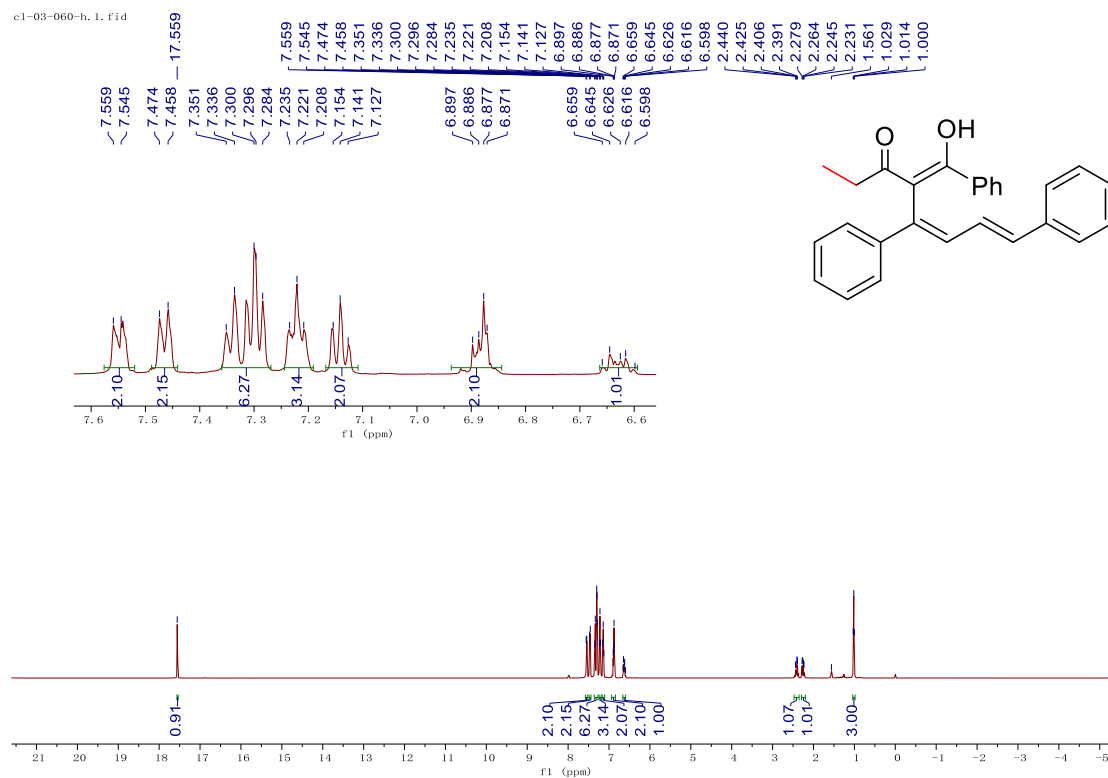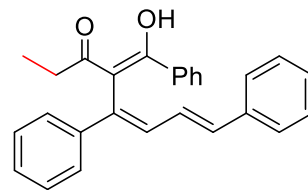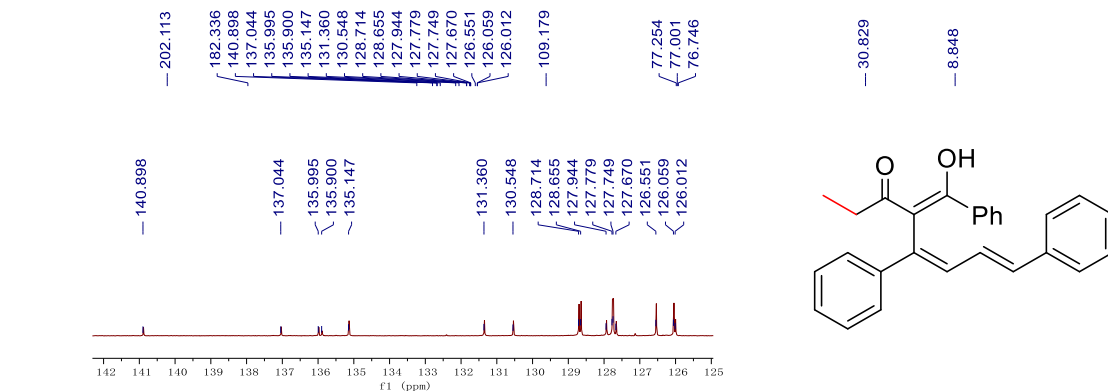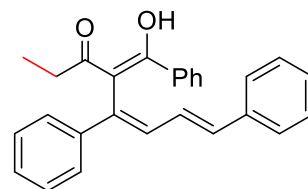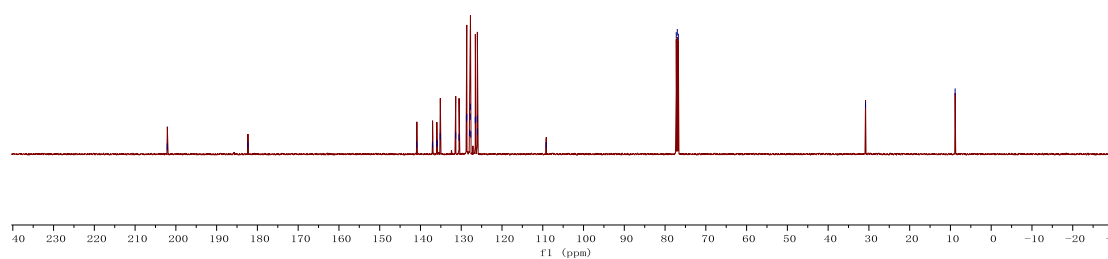

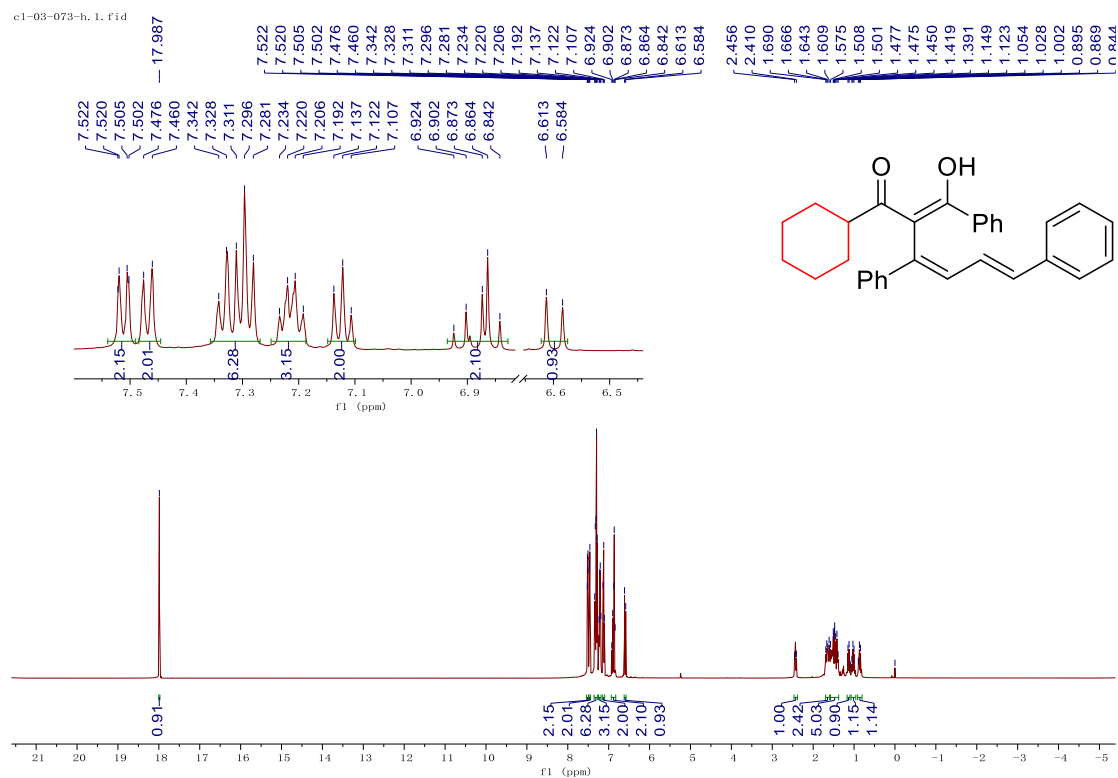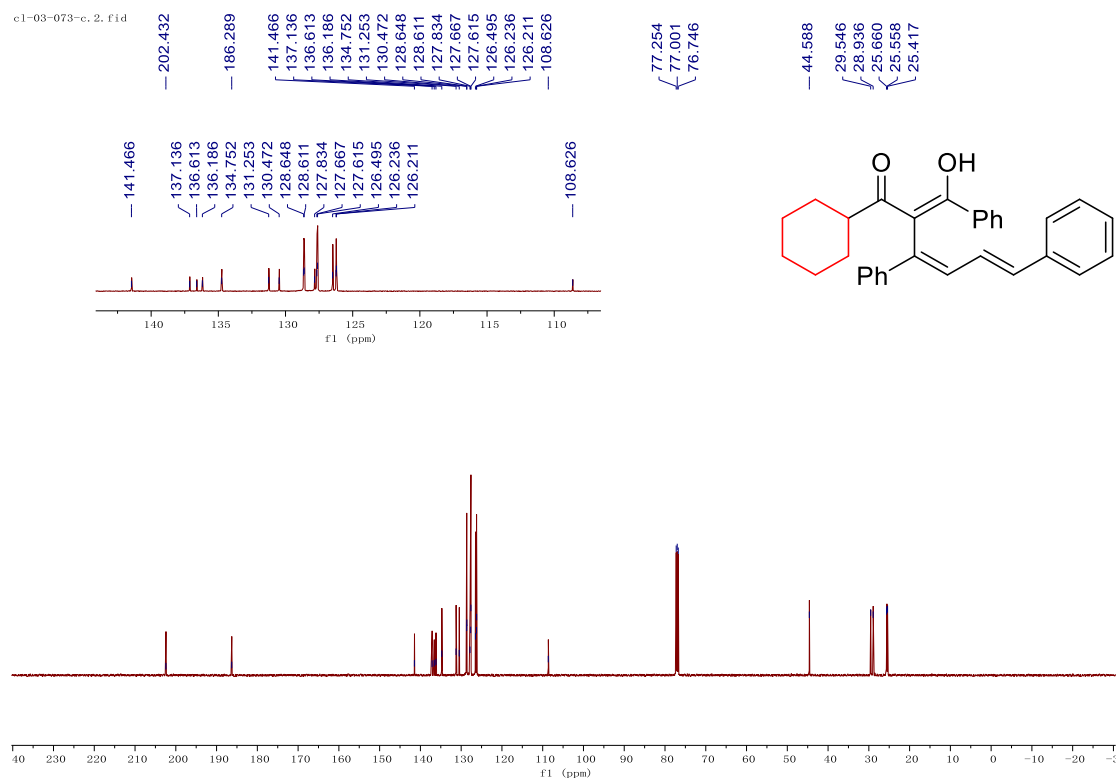

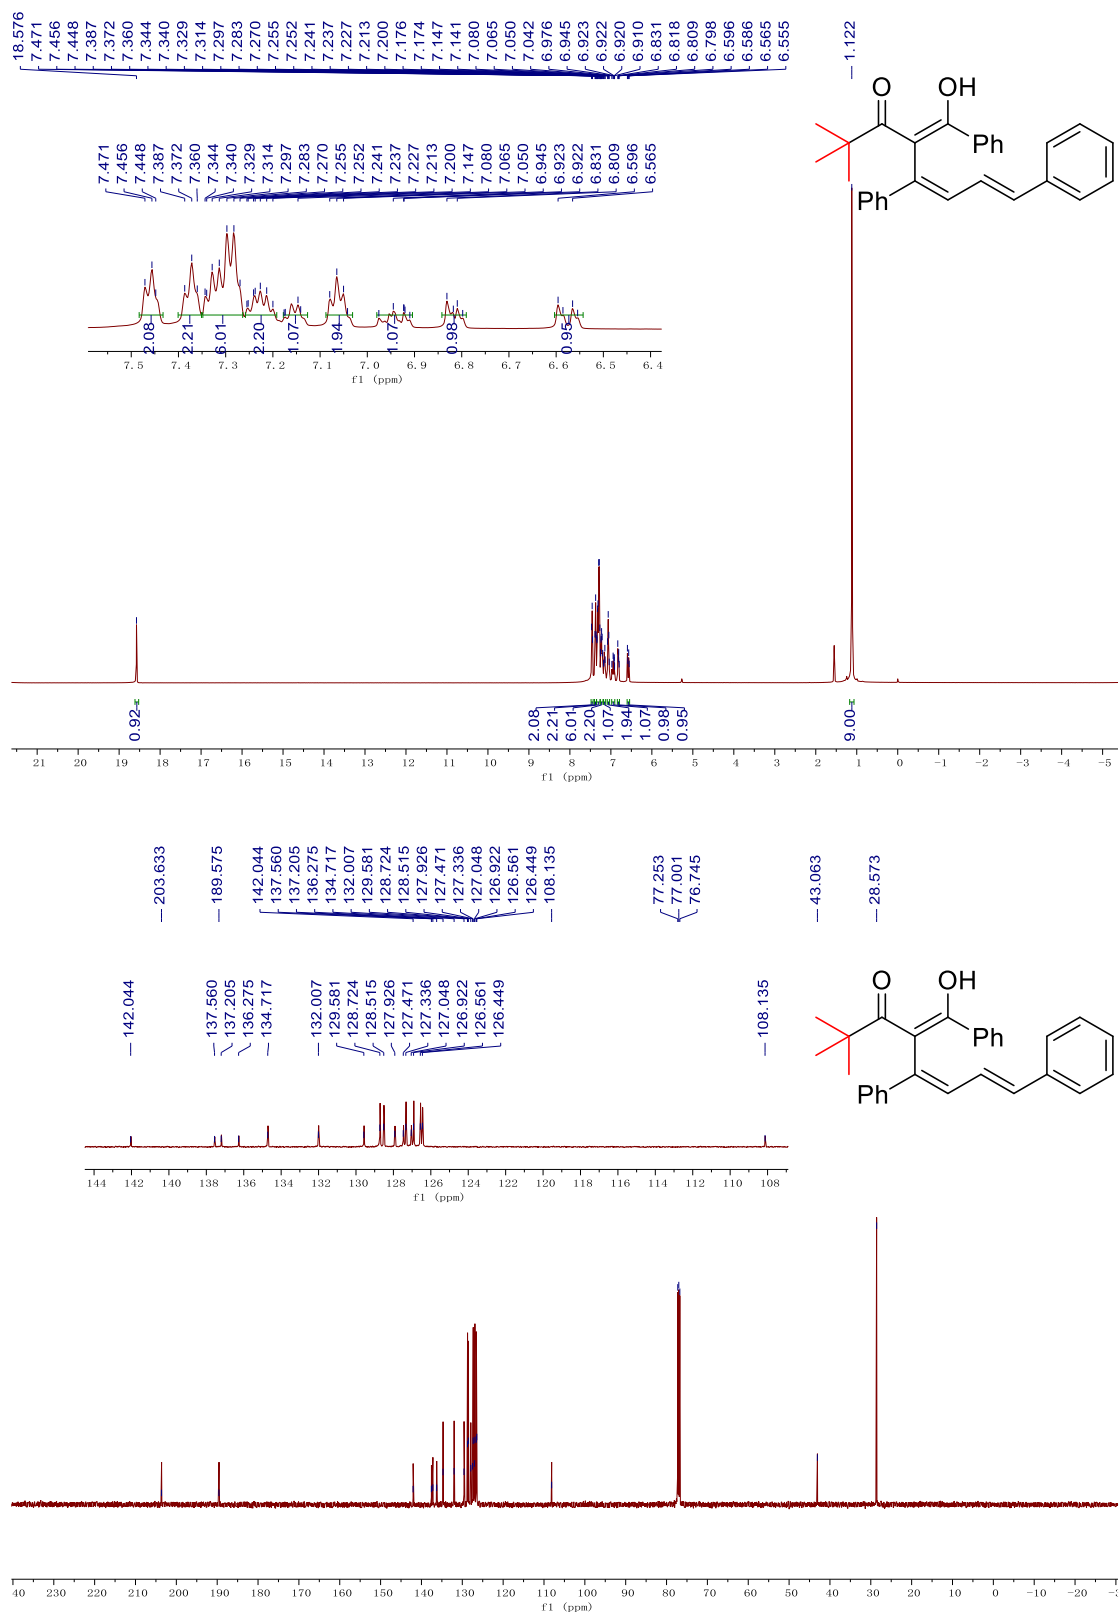



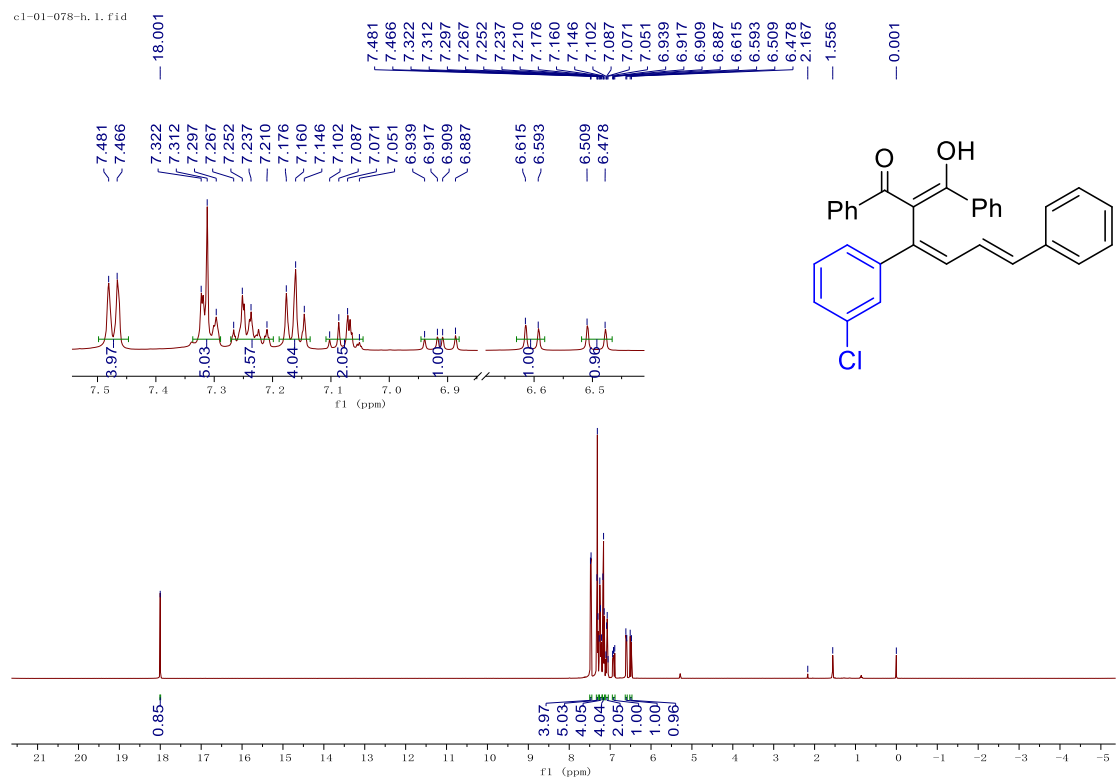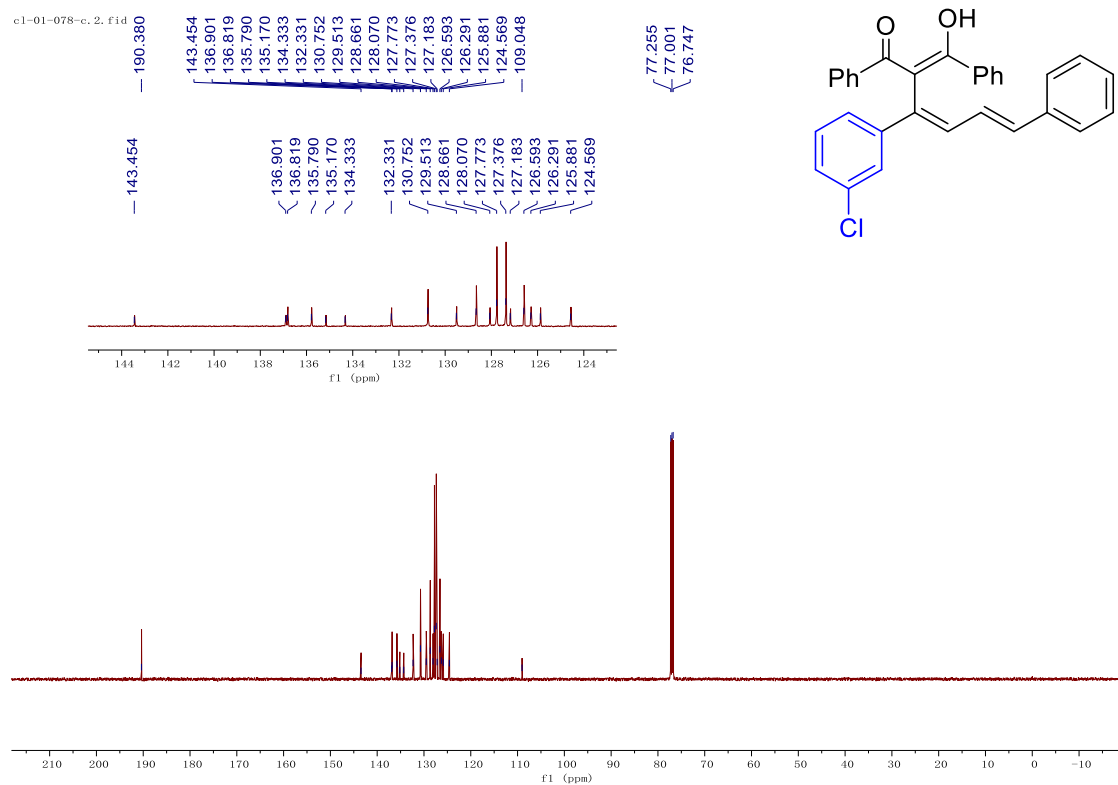

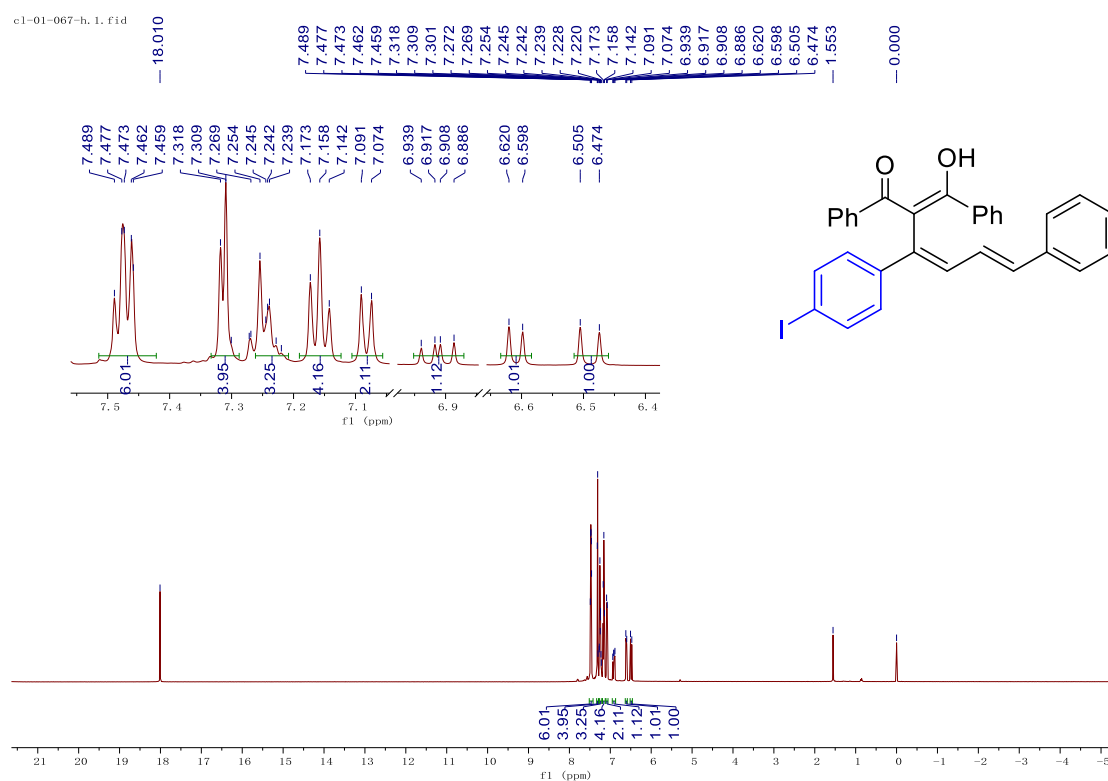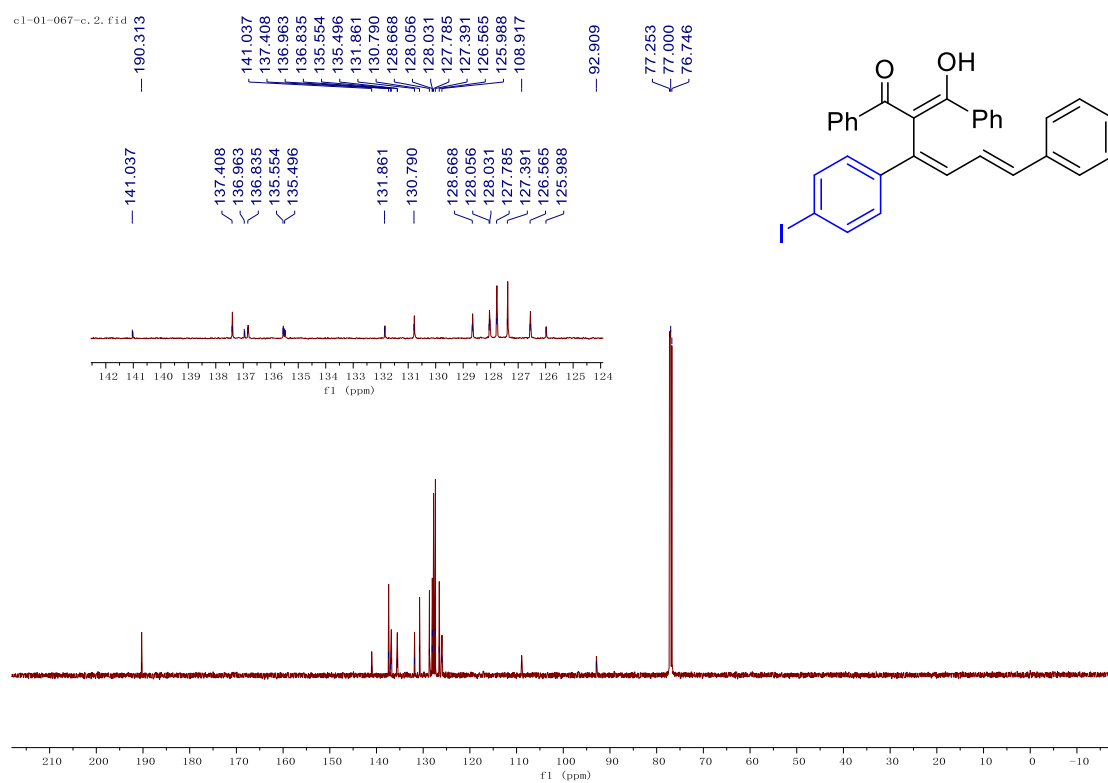

c1-01-071-h, 1. f1d

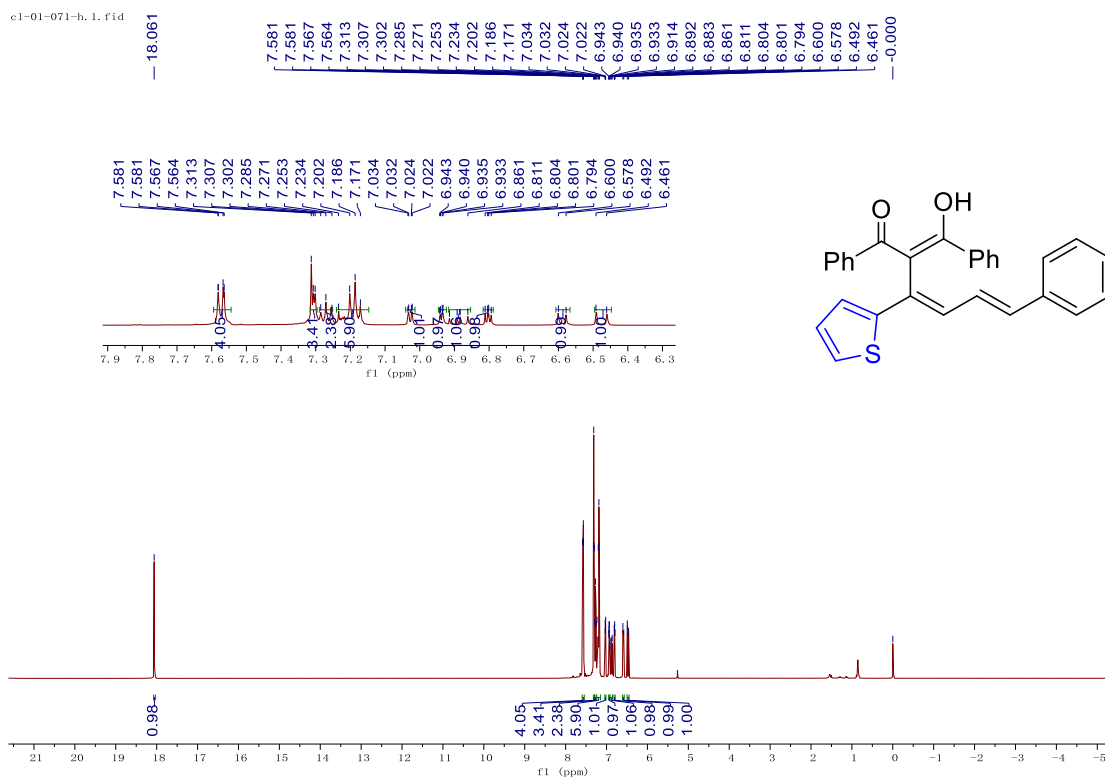

c1-01-071-c, 2. f1d

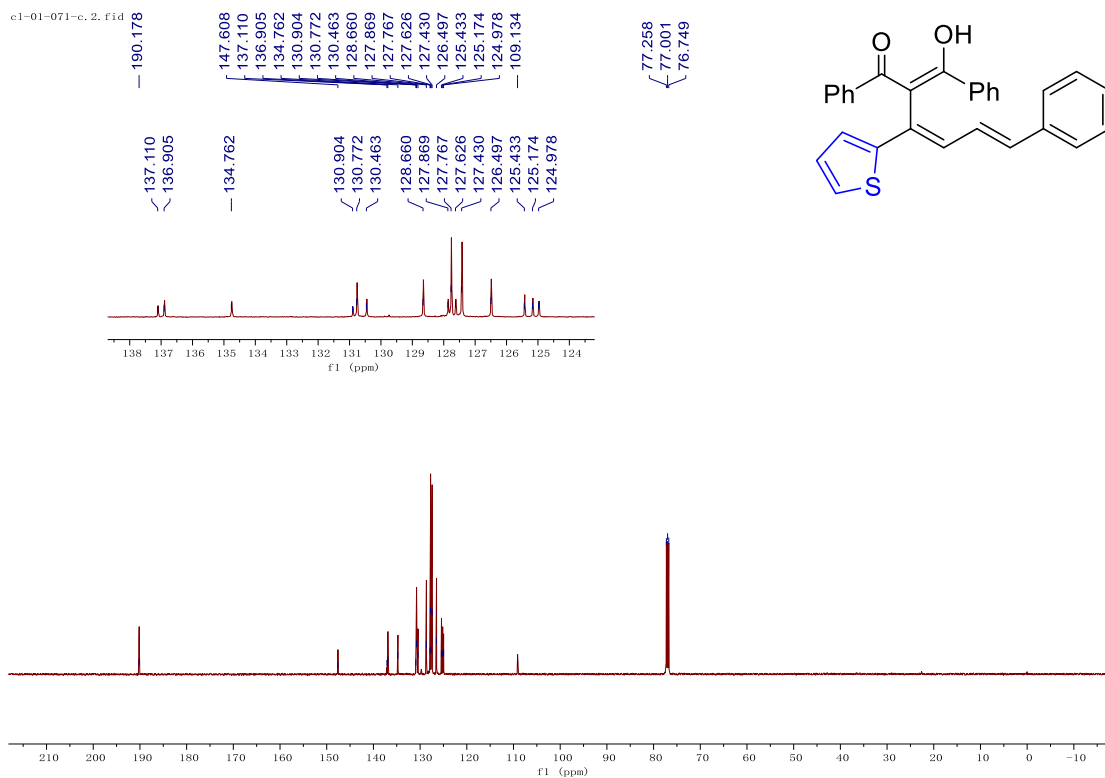

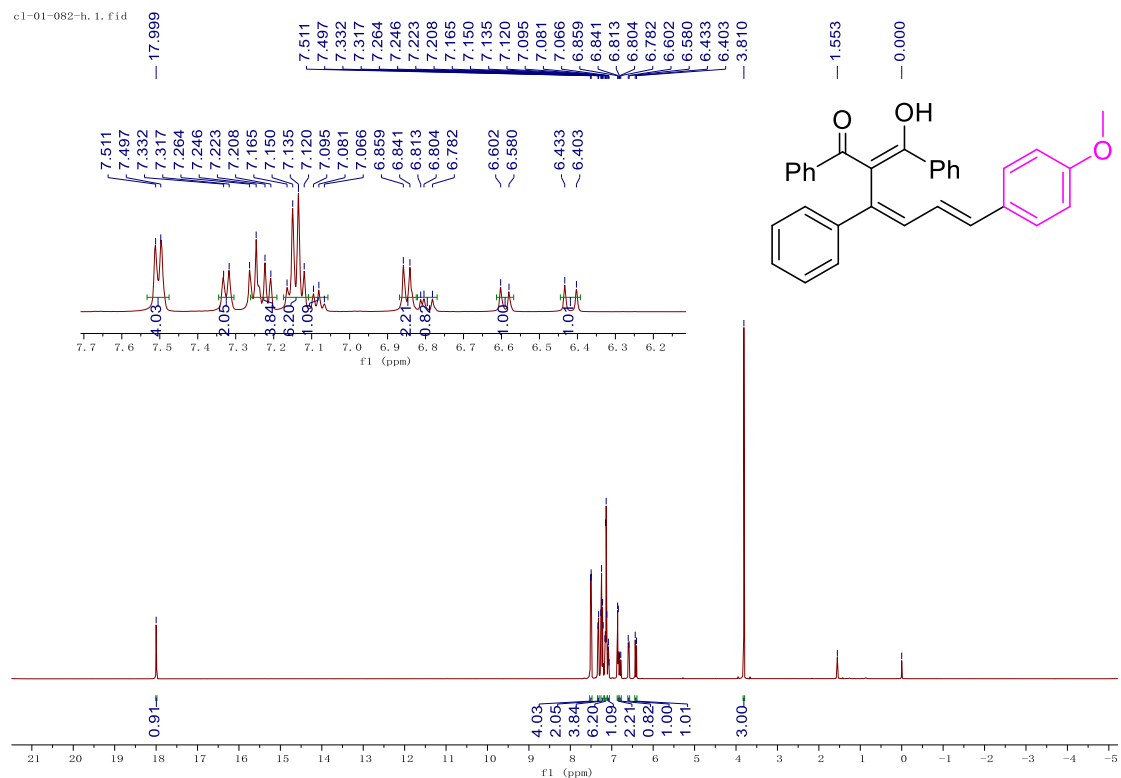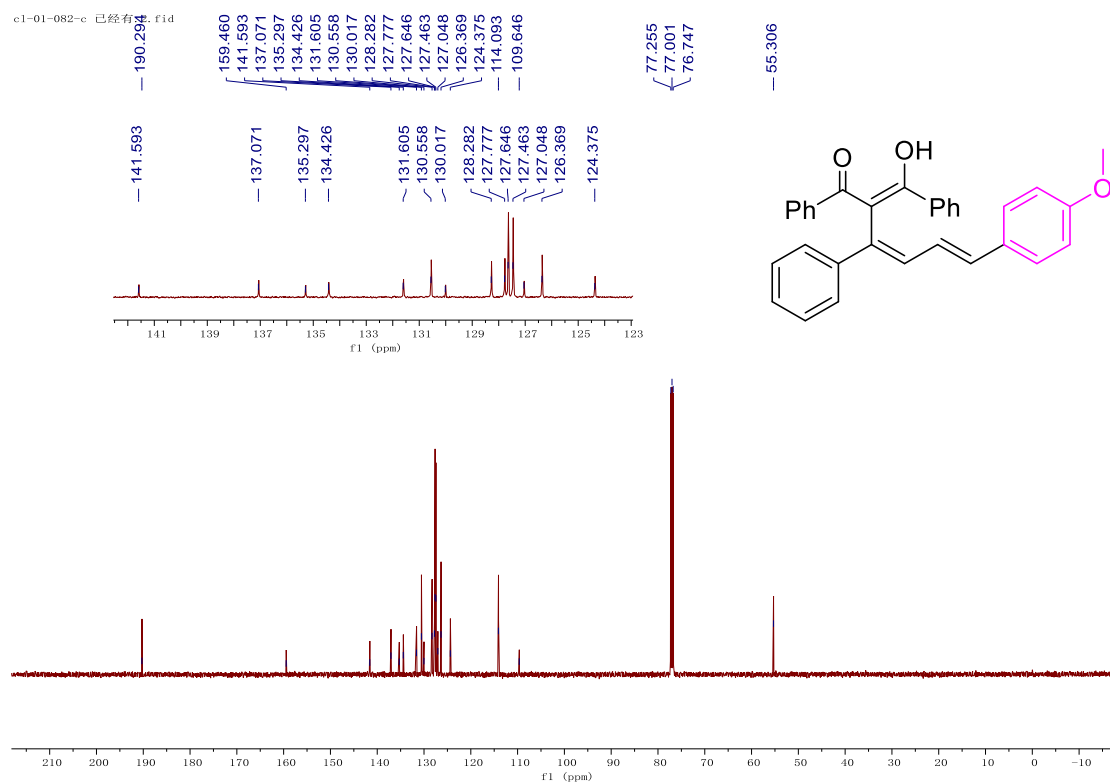

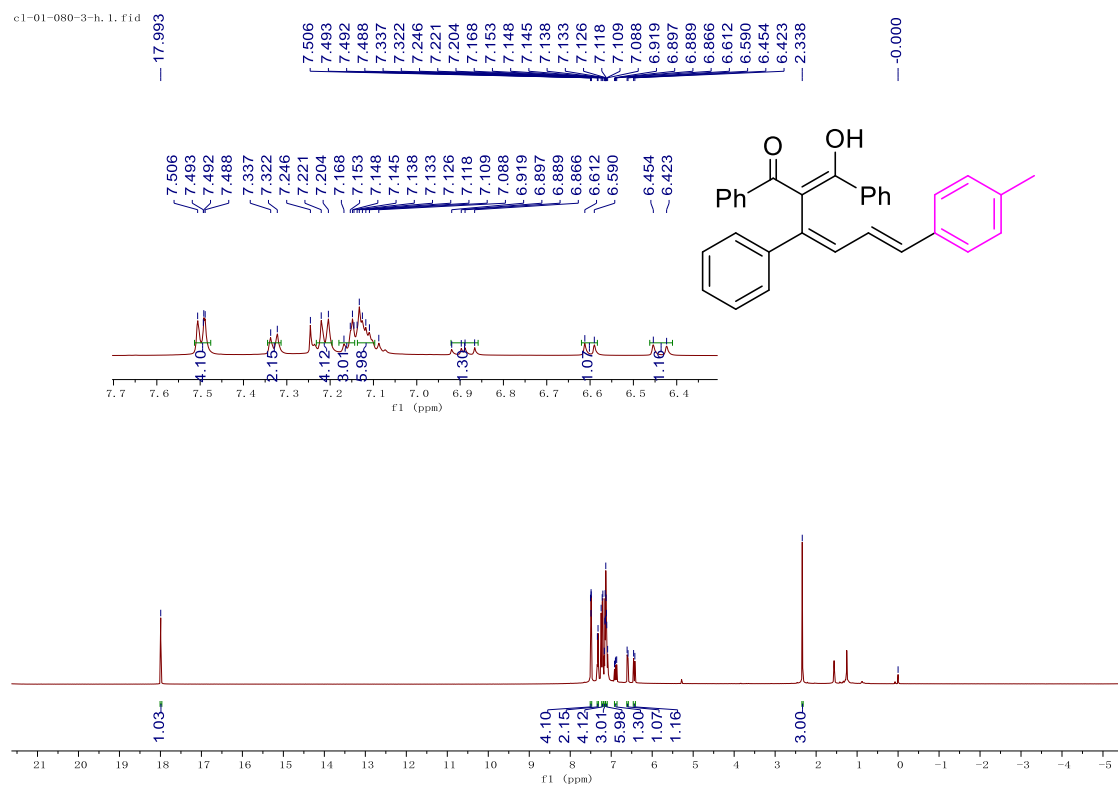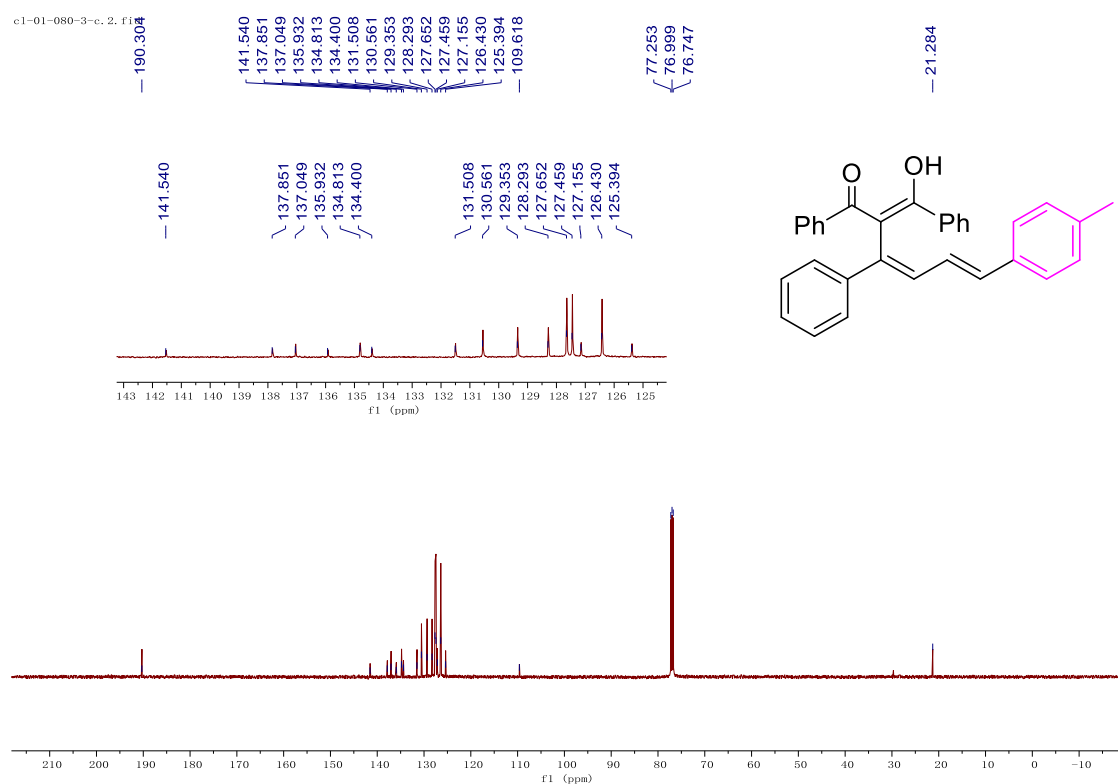

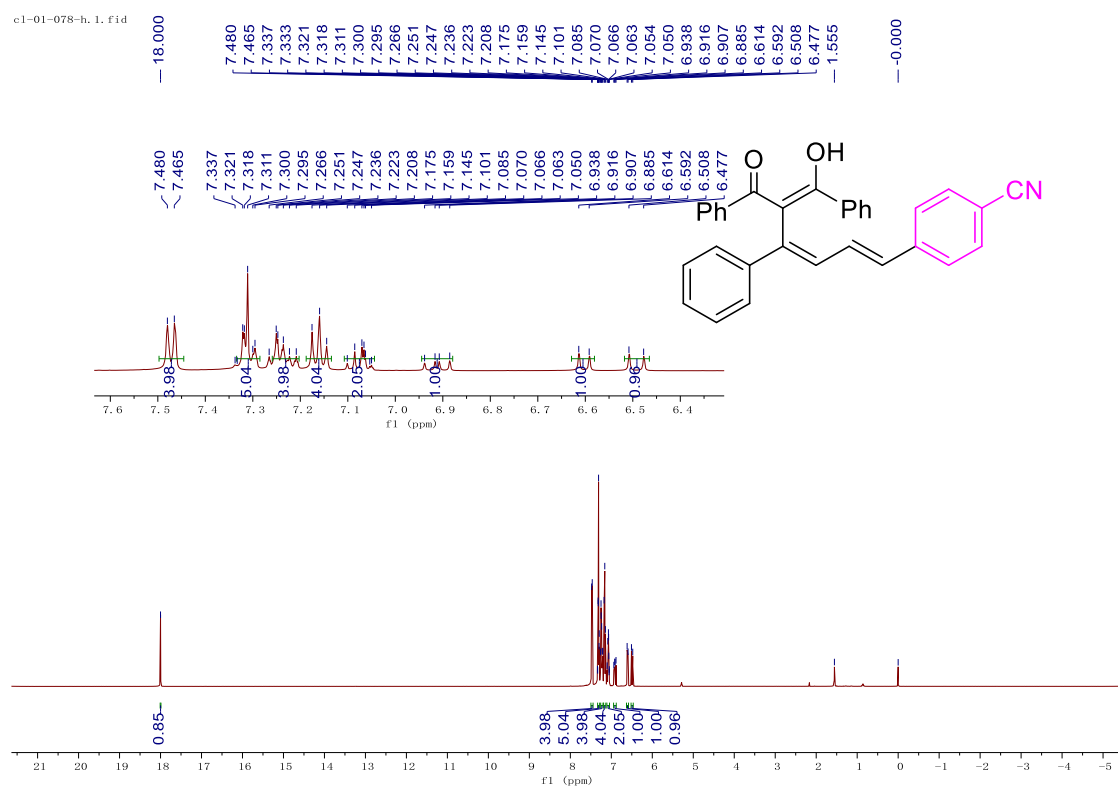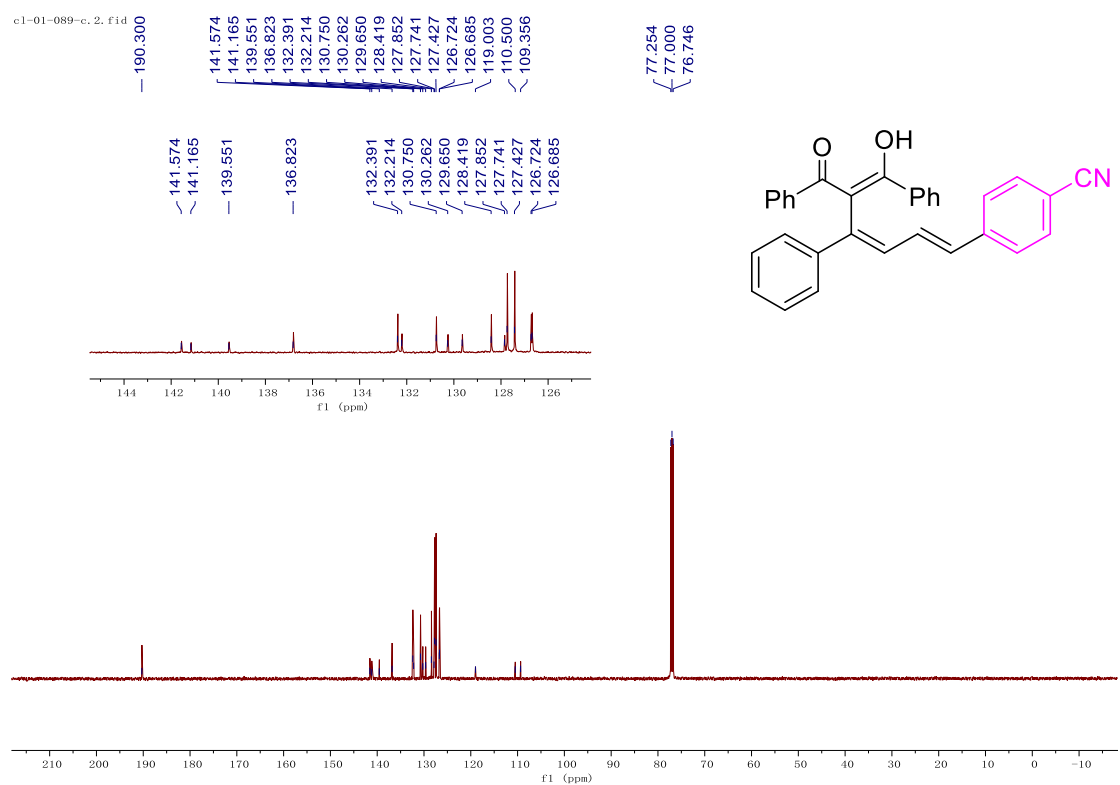



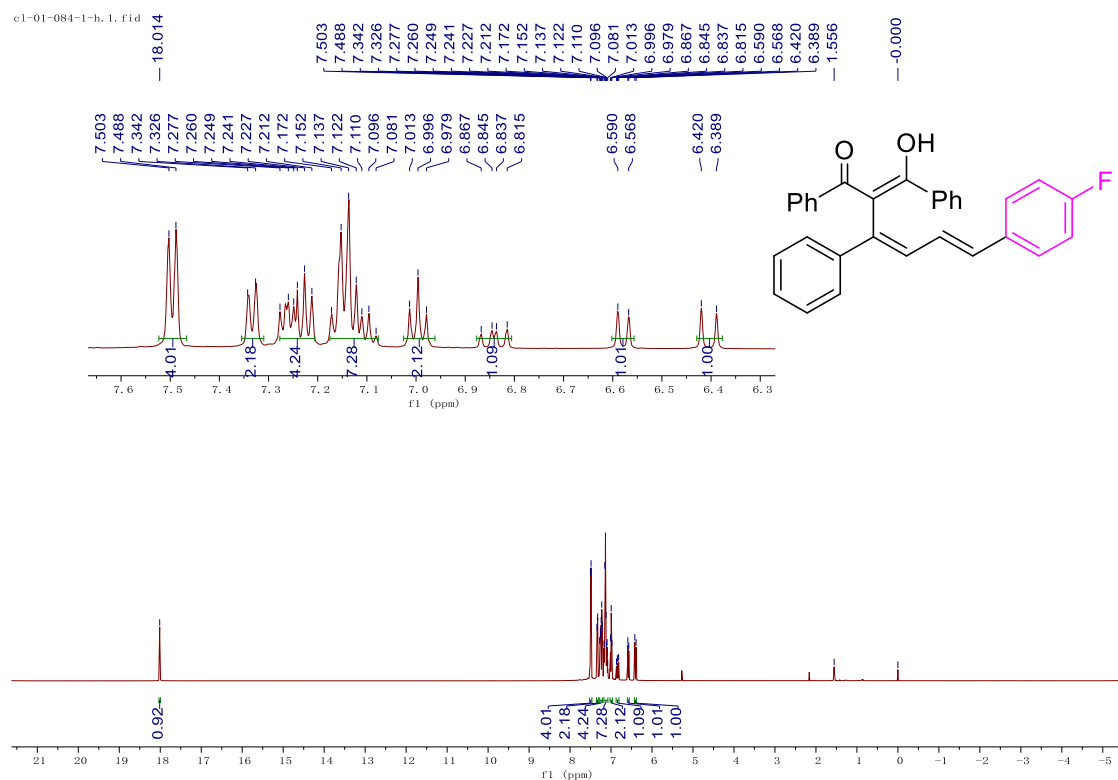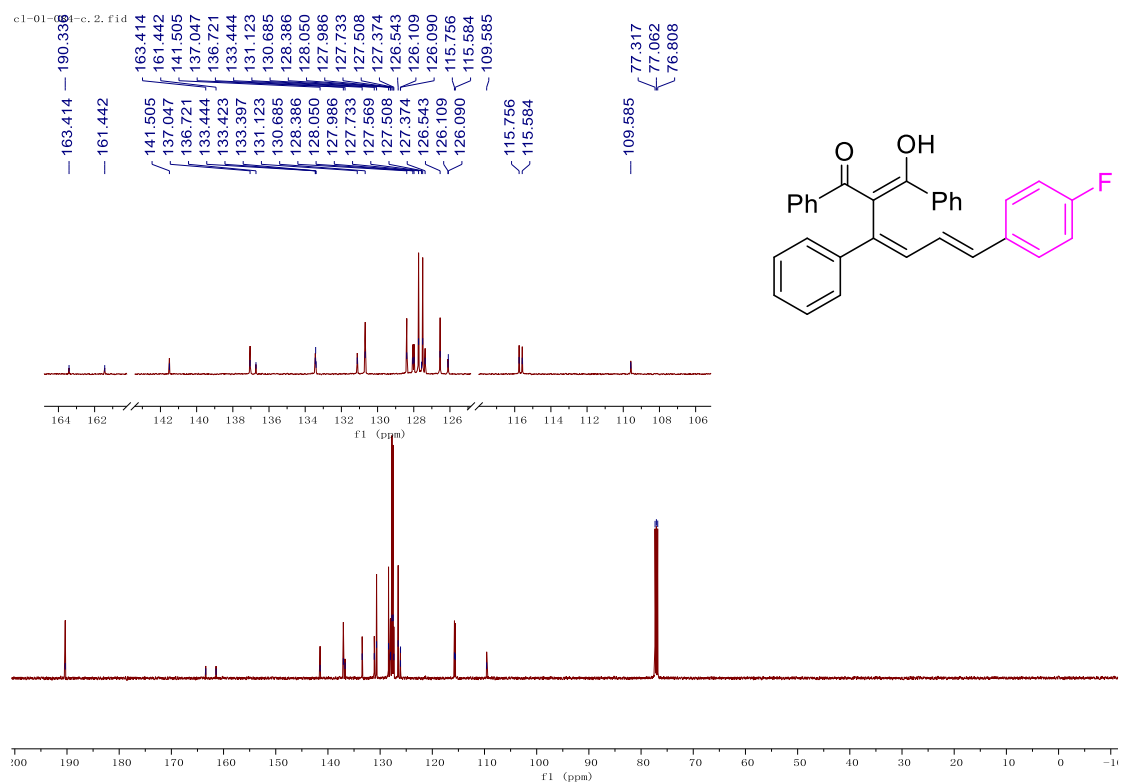

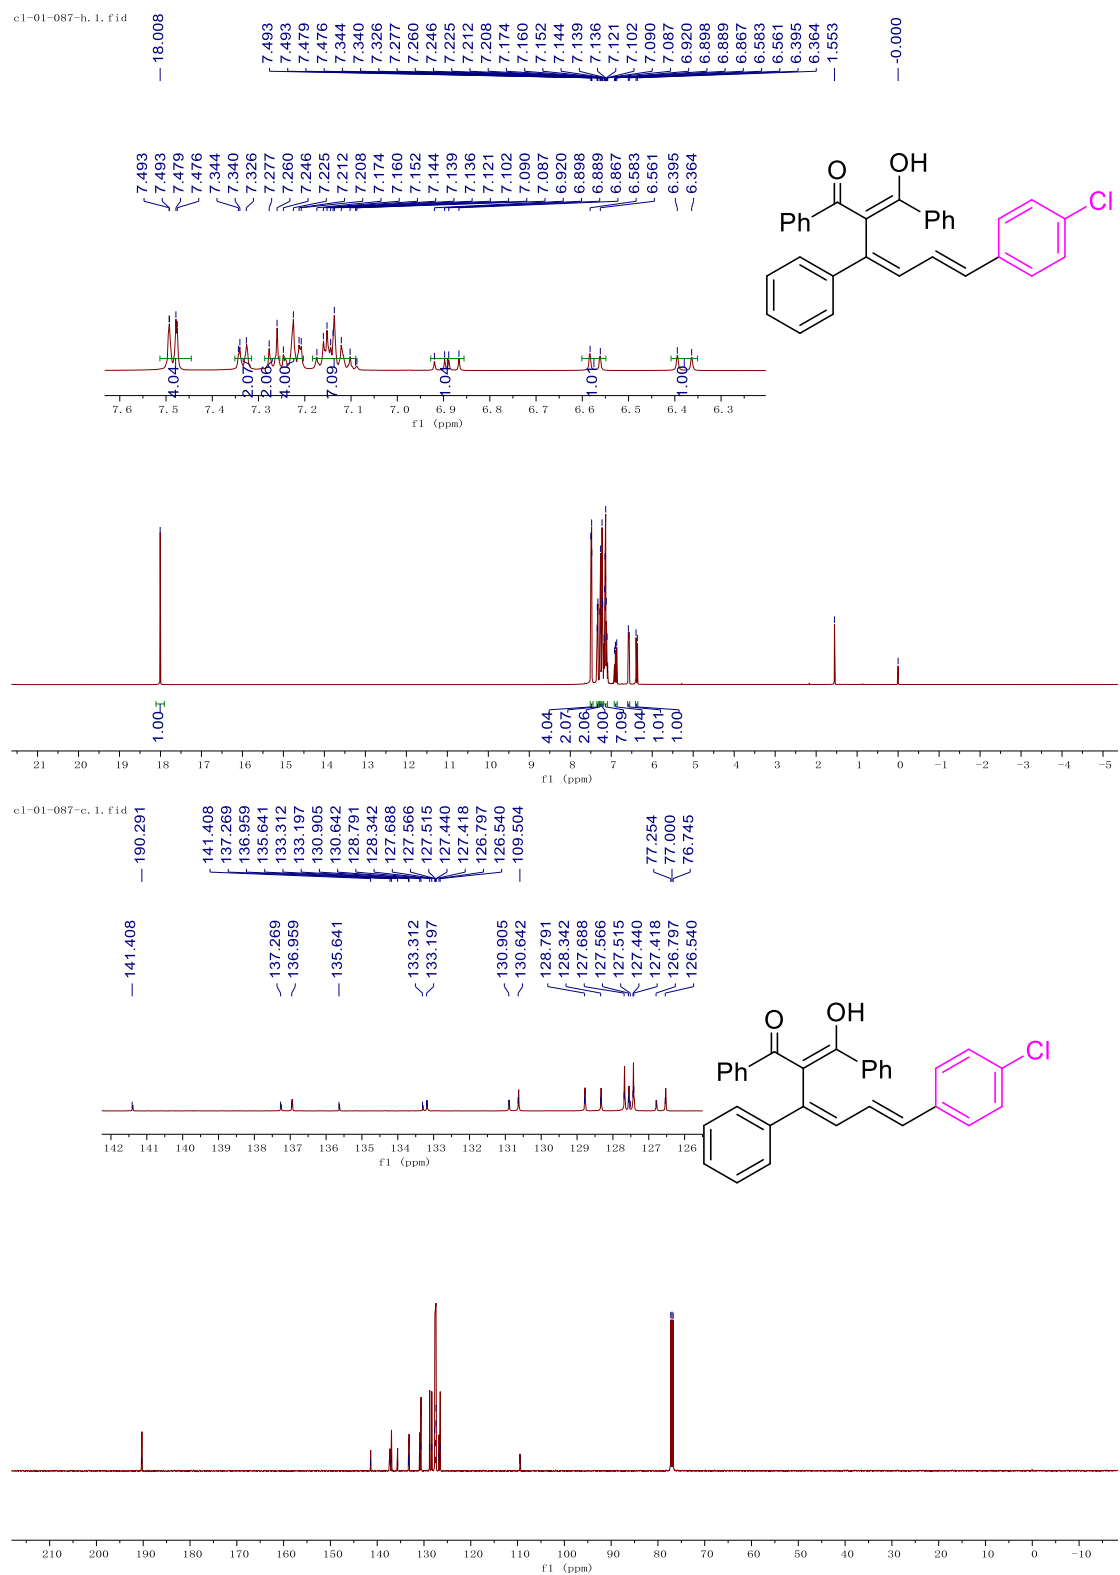

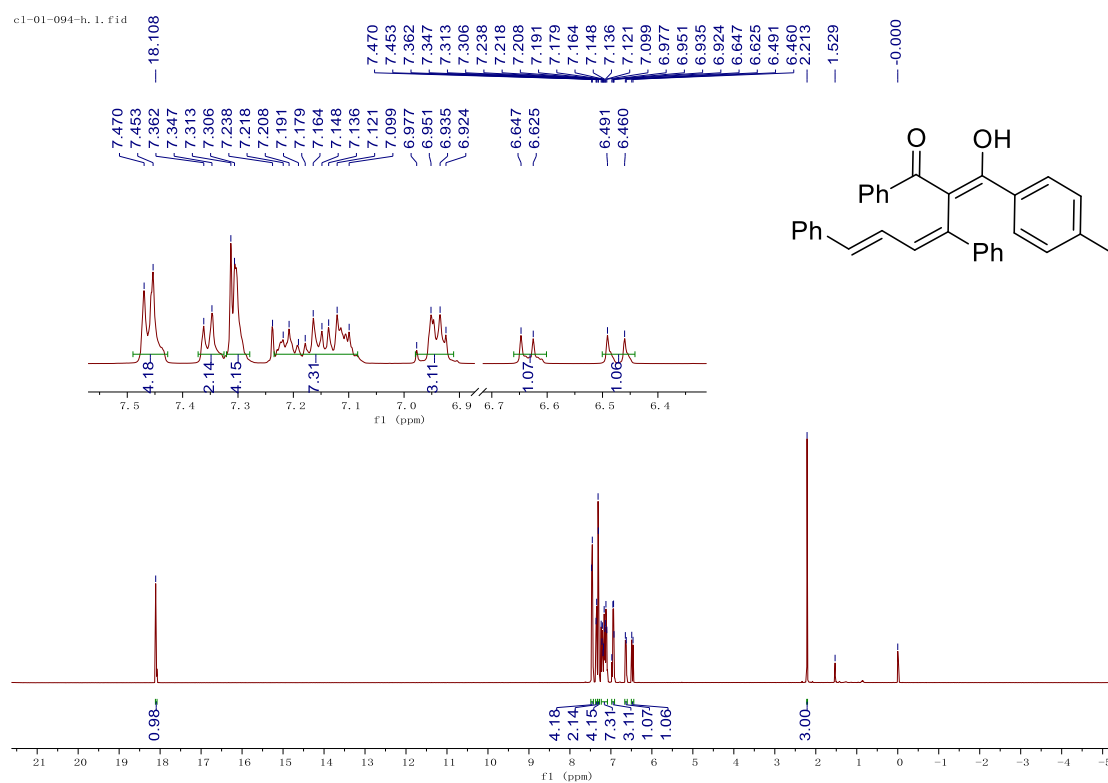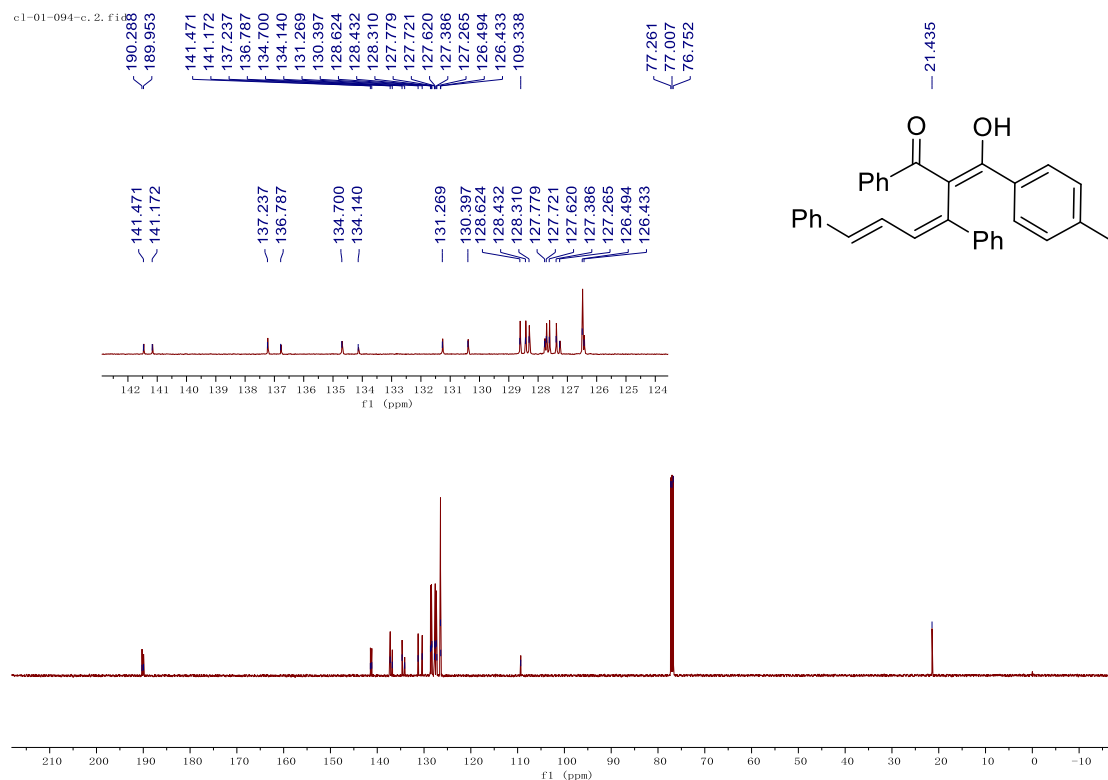

c1-03-06-2-h, 1, f1.d

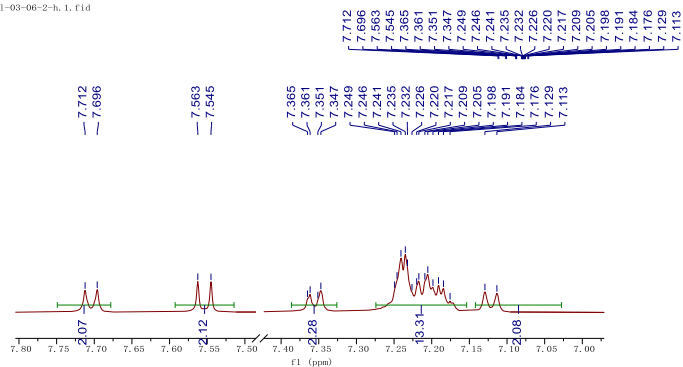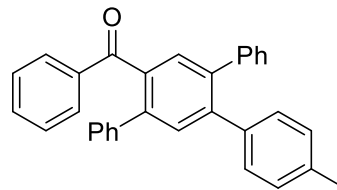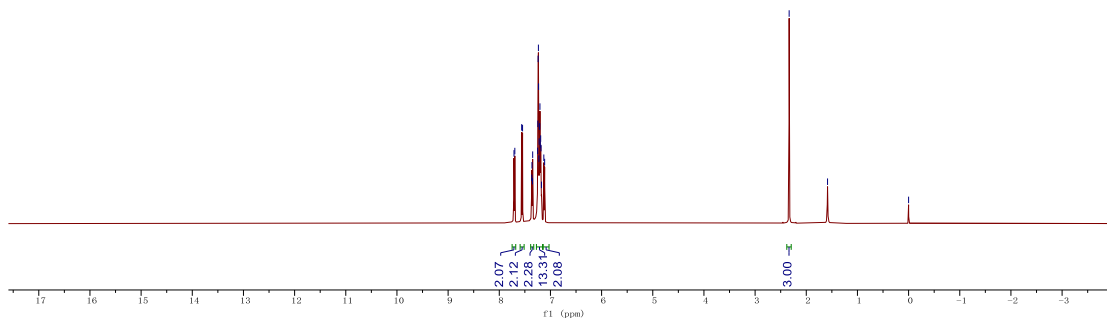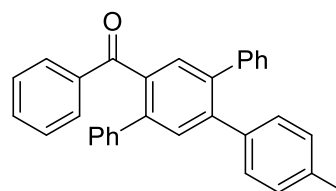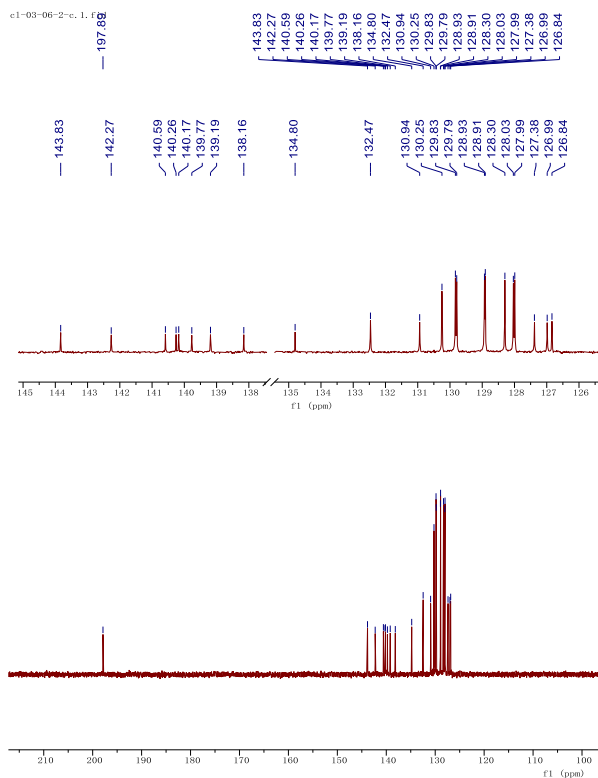

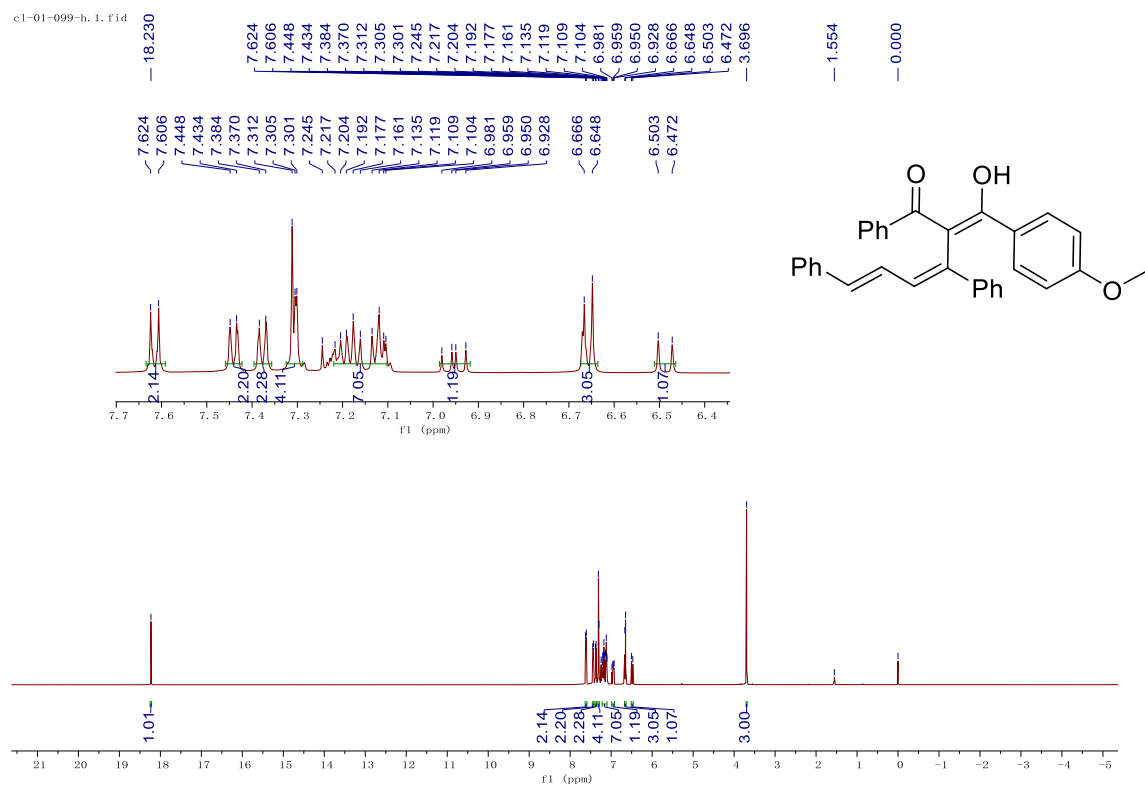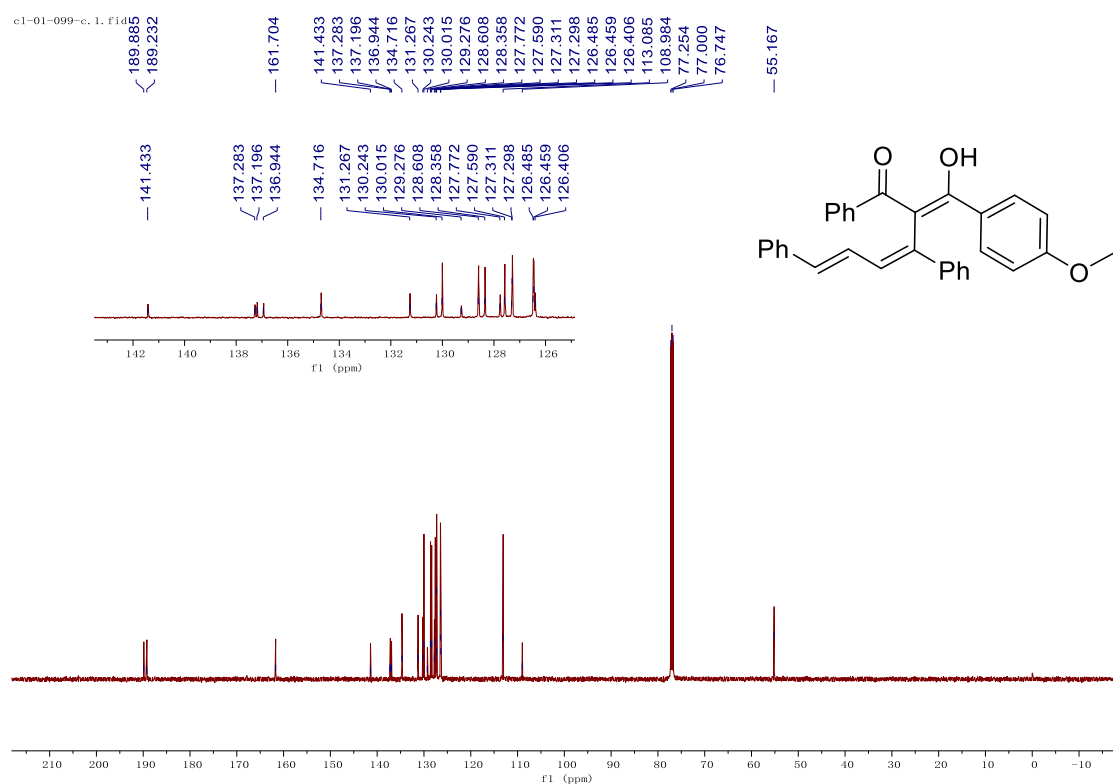

c1-03-021-2-h, 1, f1d

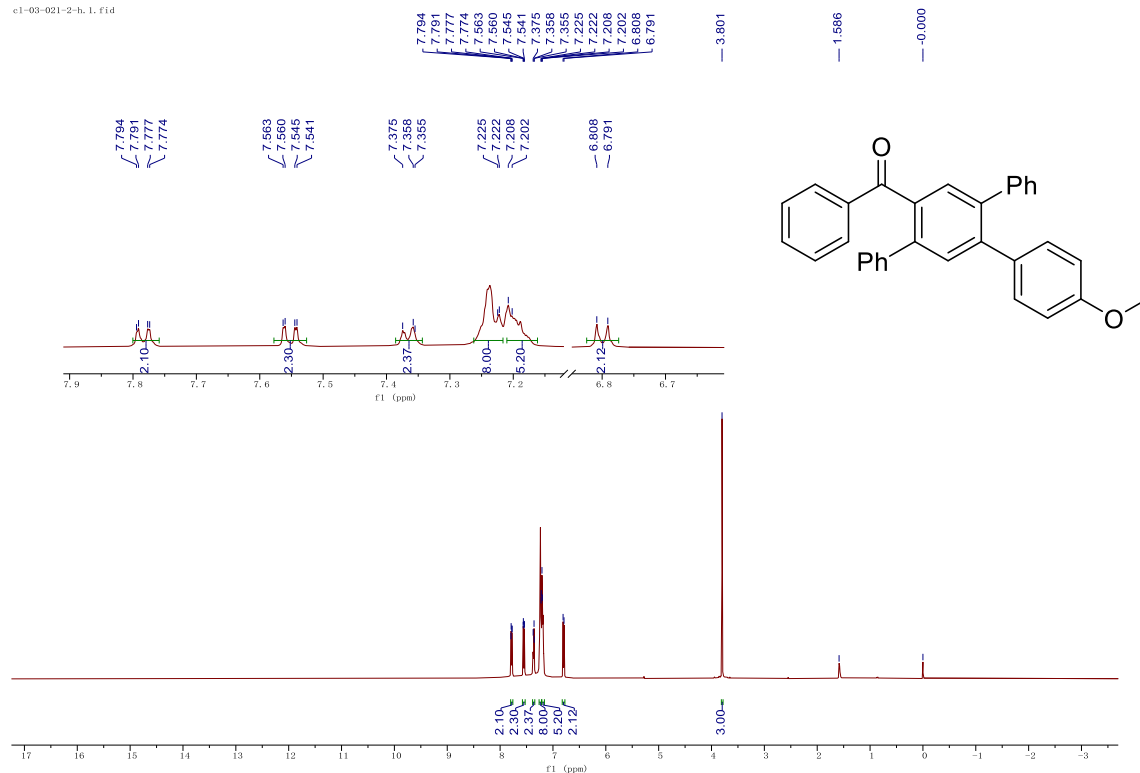

c1-03-021-2-c, 1, f1d

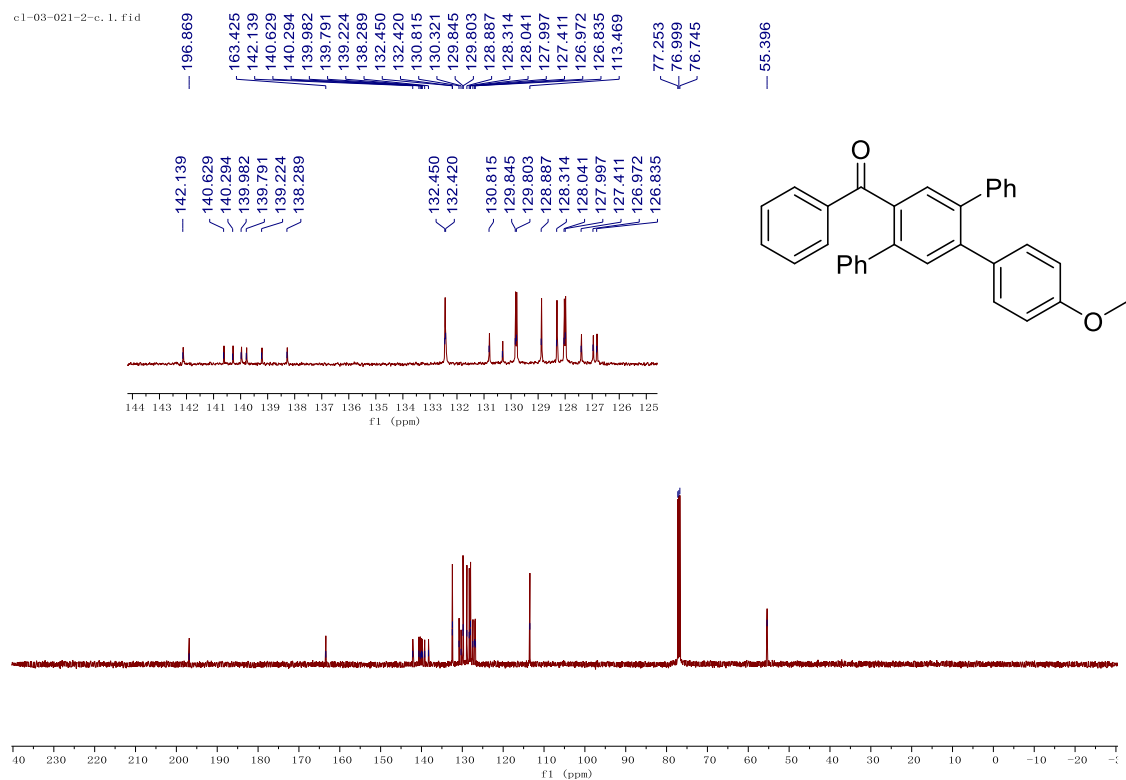

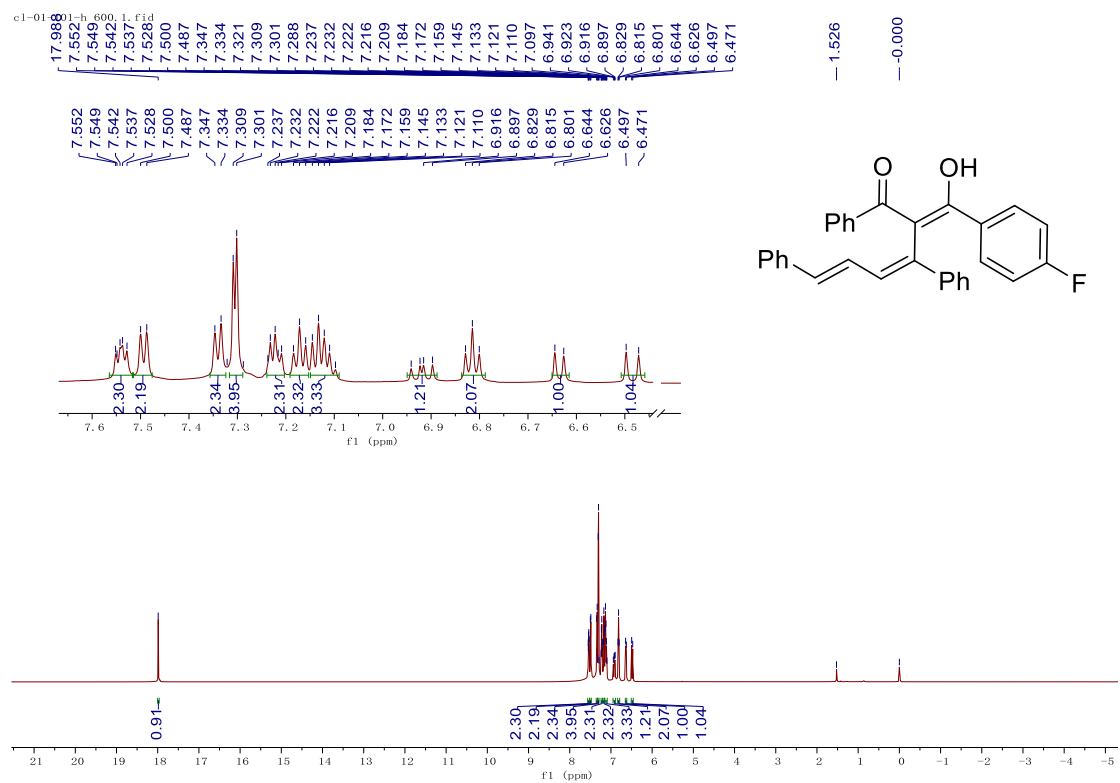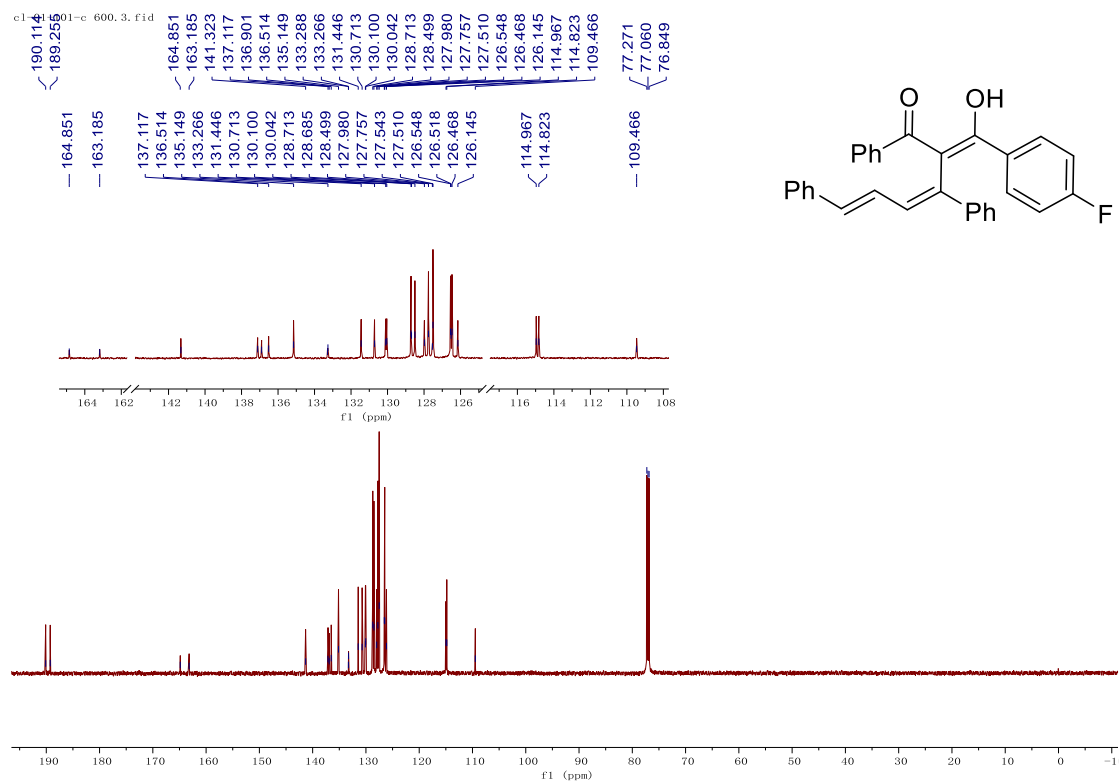



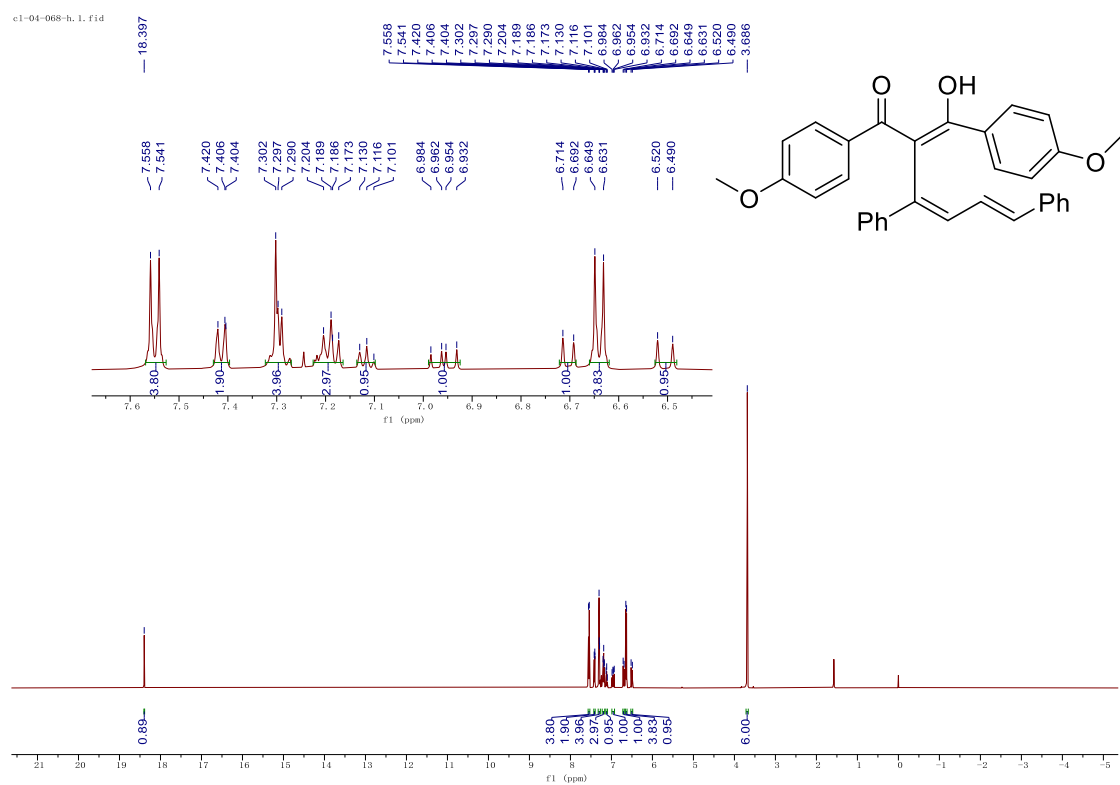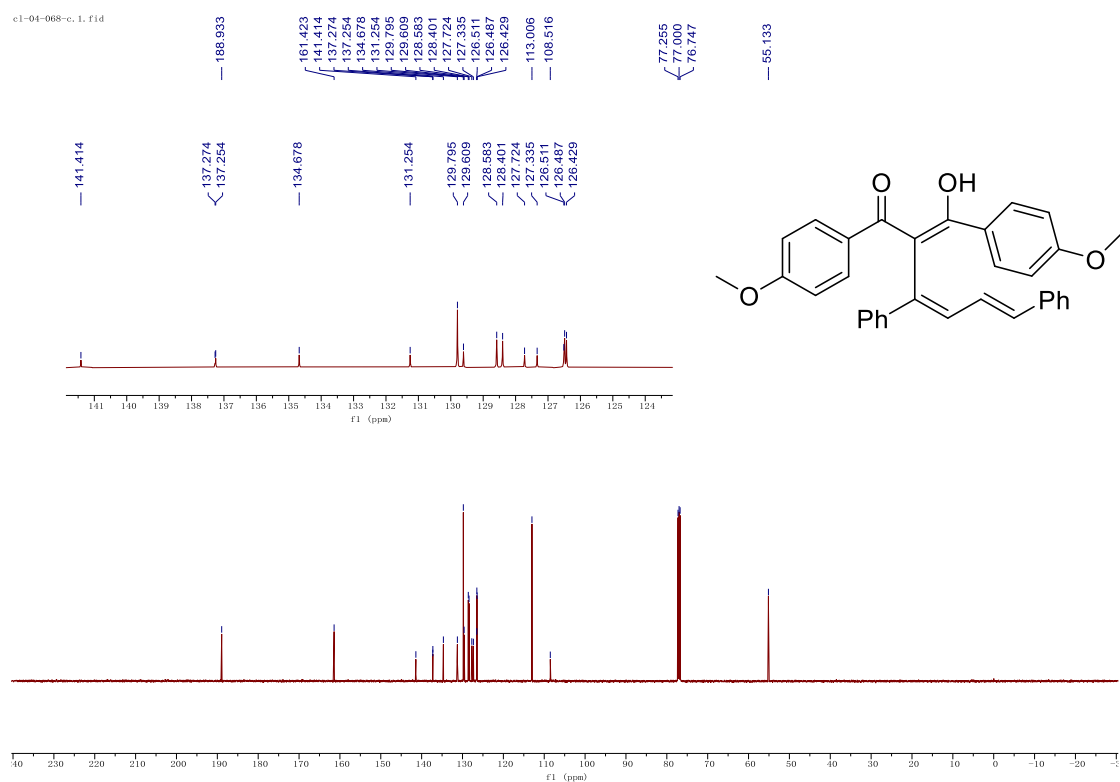

c1-04-068-x-h, 1, f1d

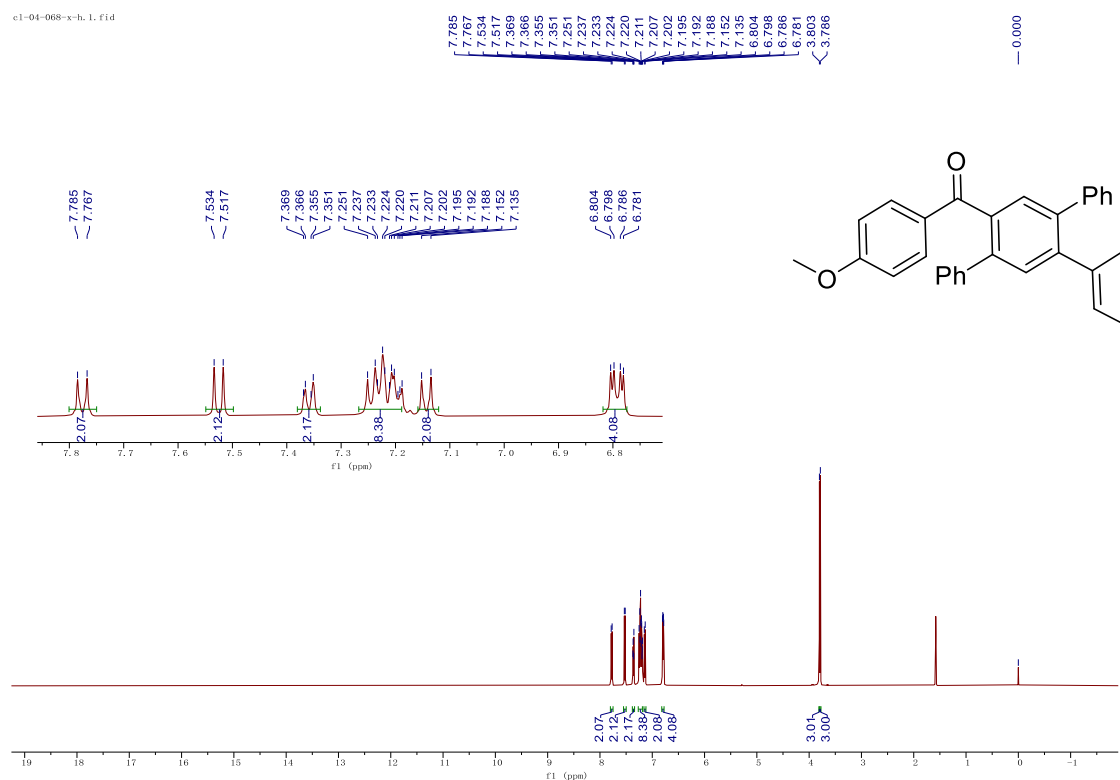

c1-04-068-x-c, 1, f1d

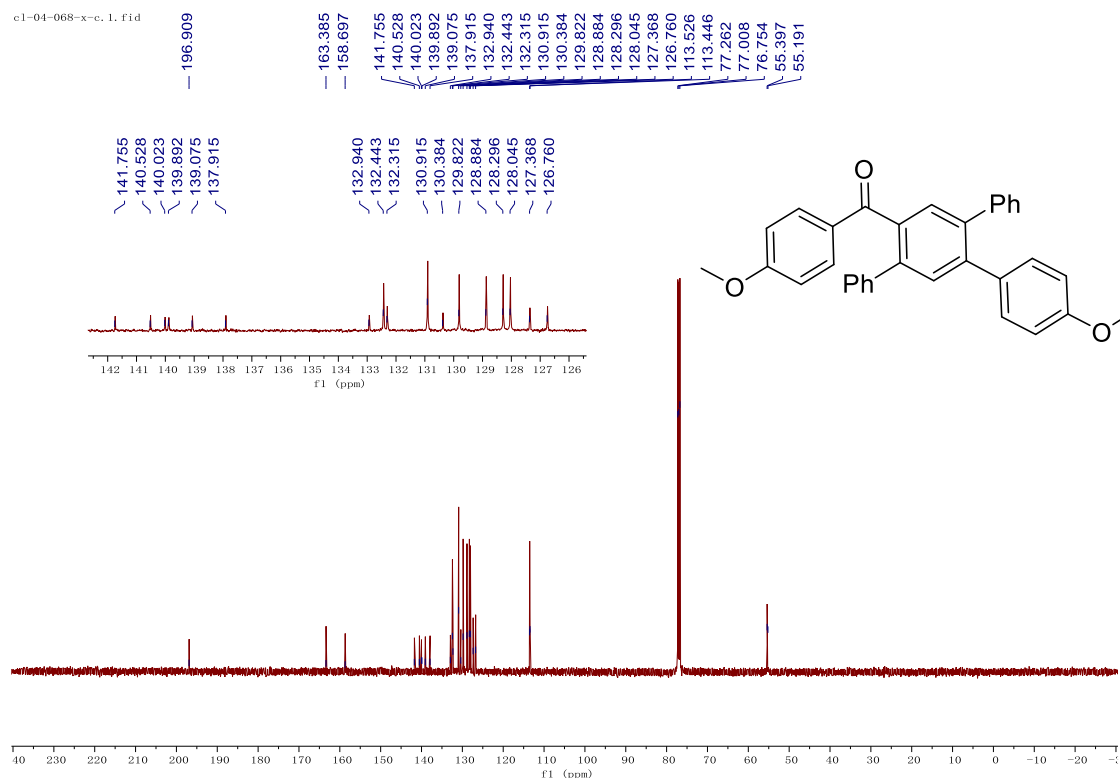



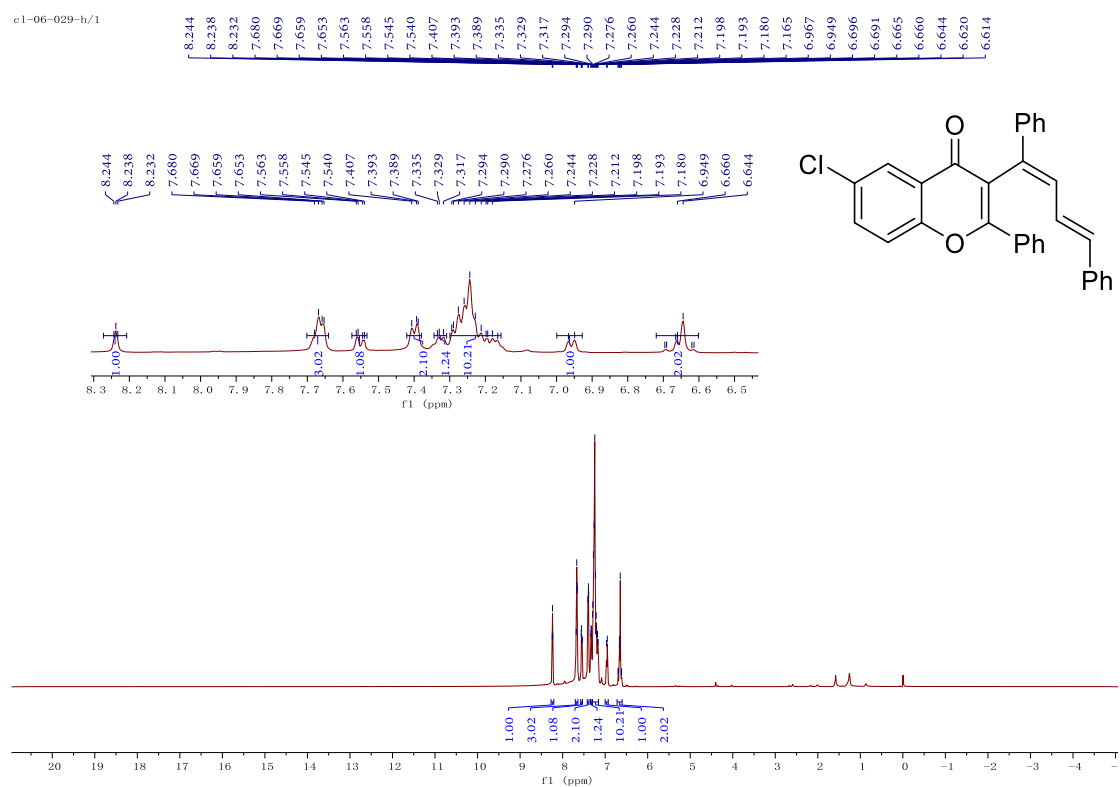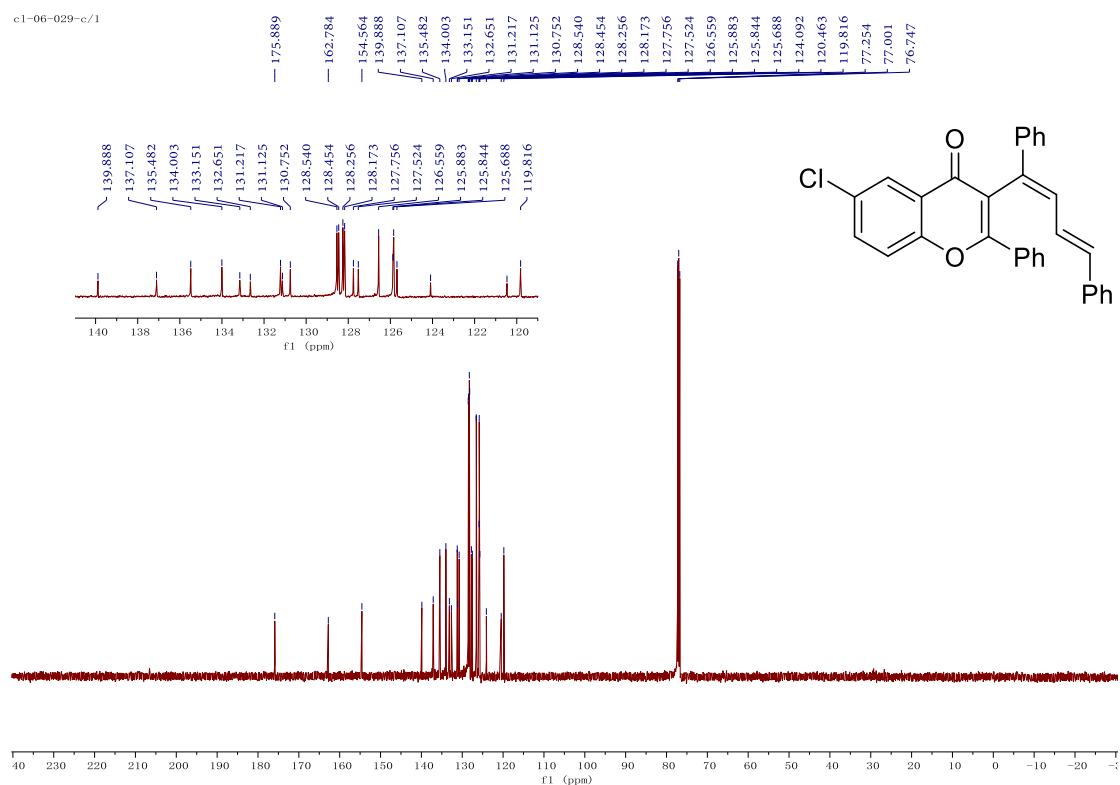

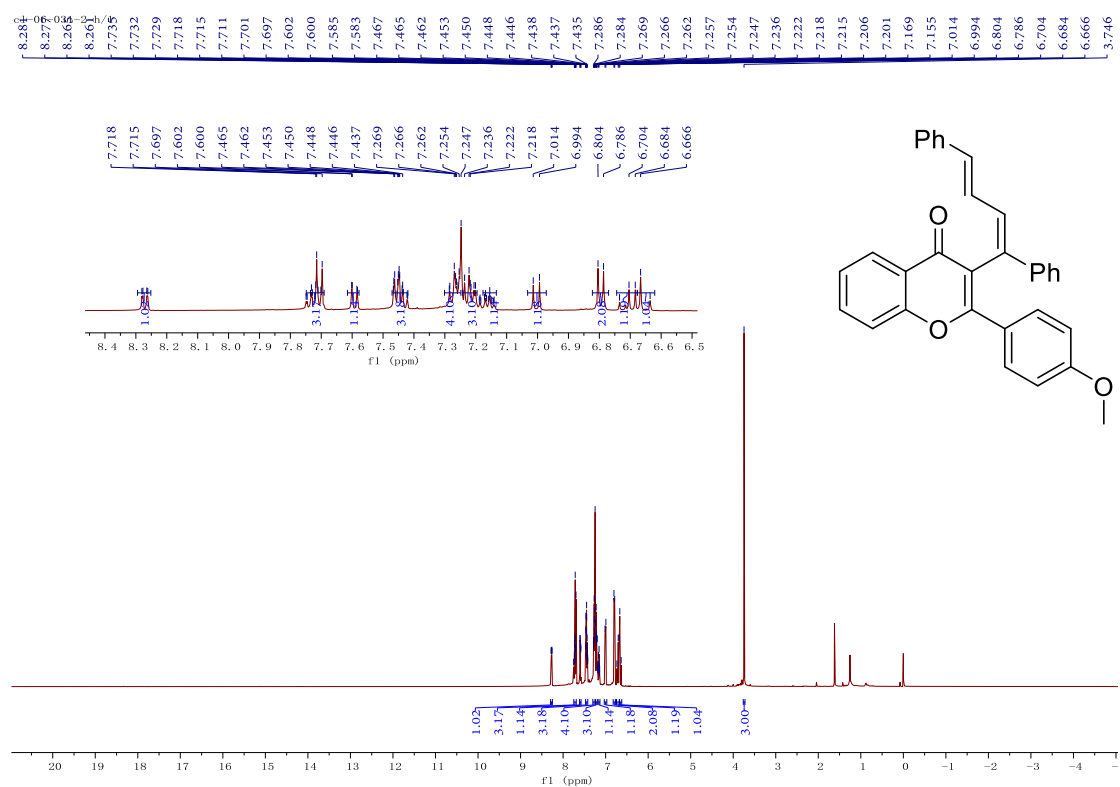

c1-06-031-2-c/1

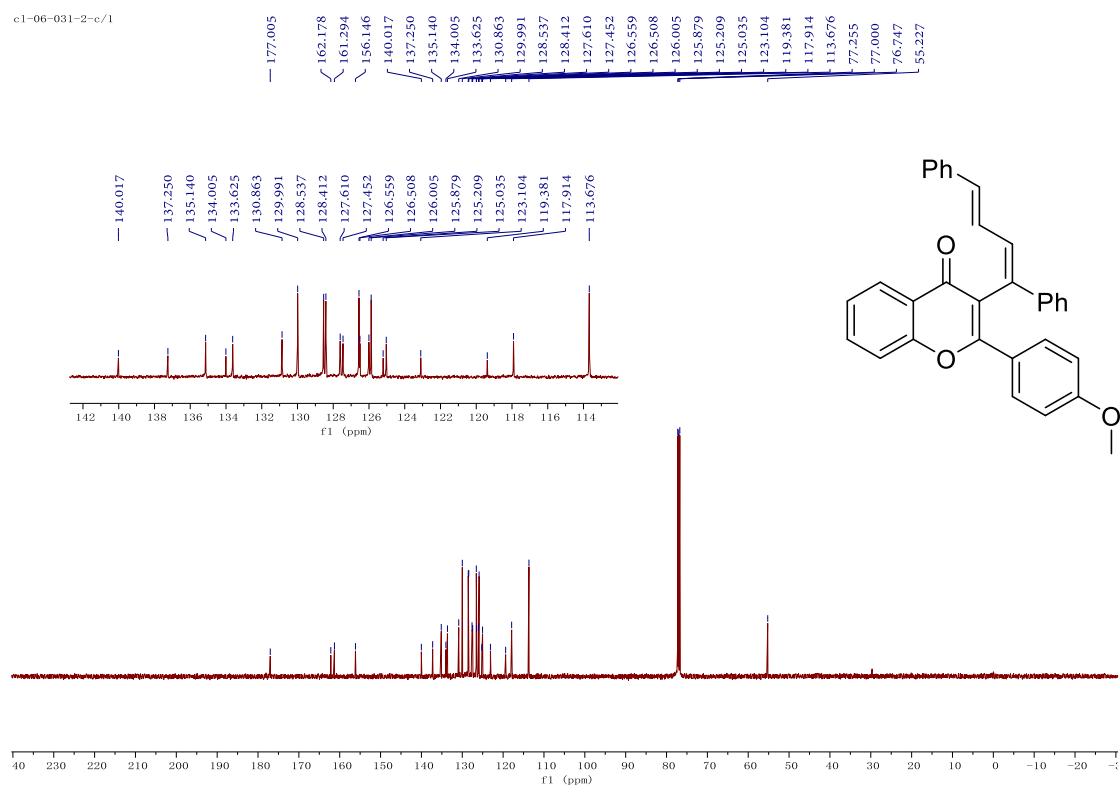

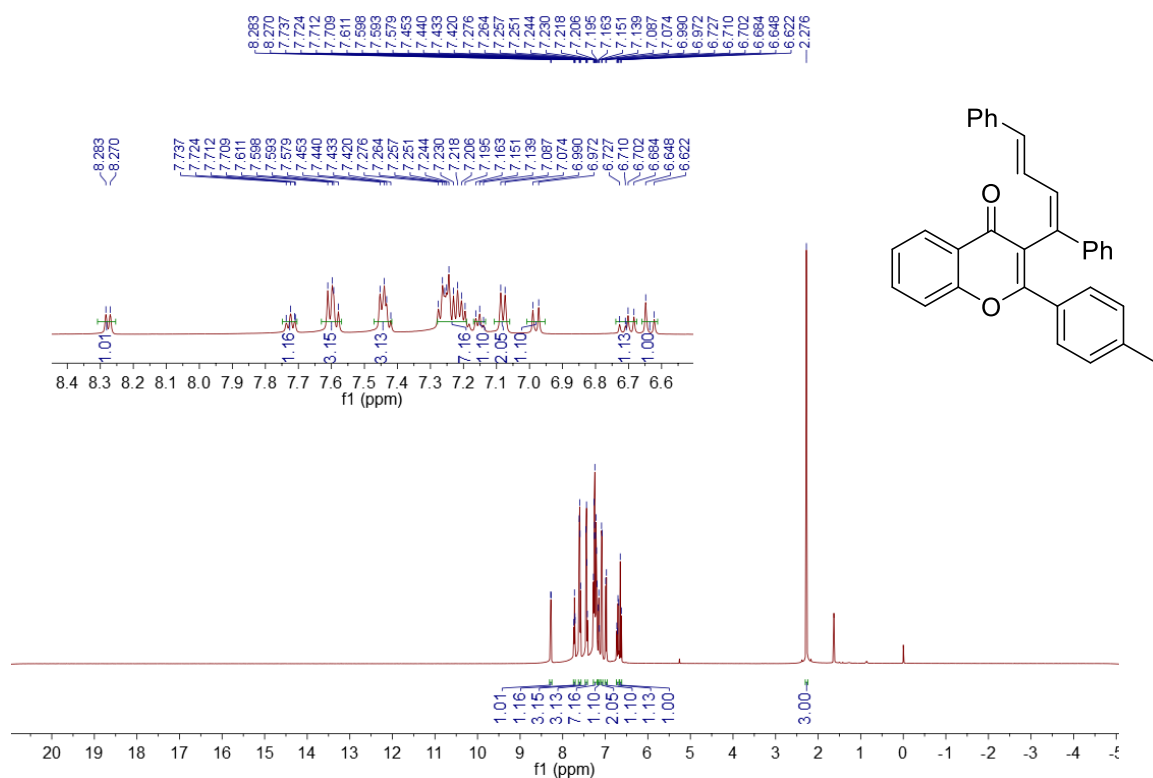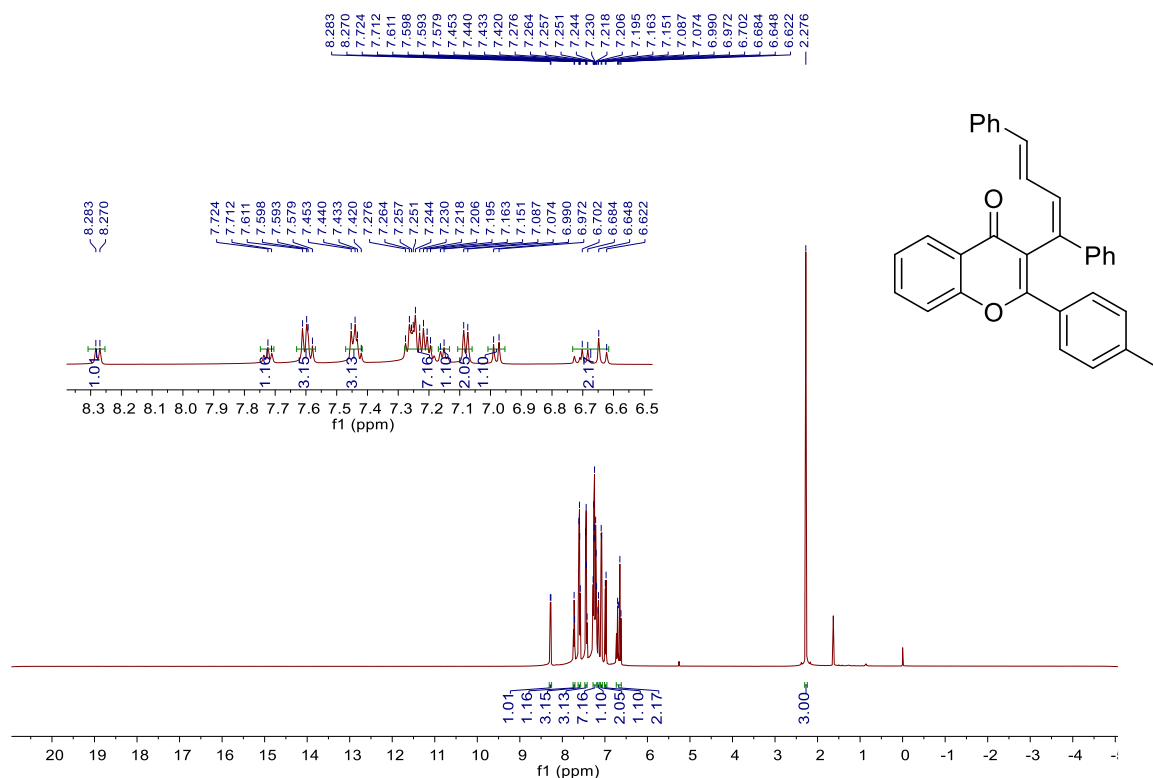

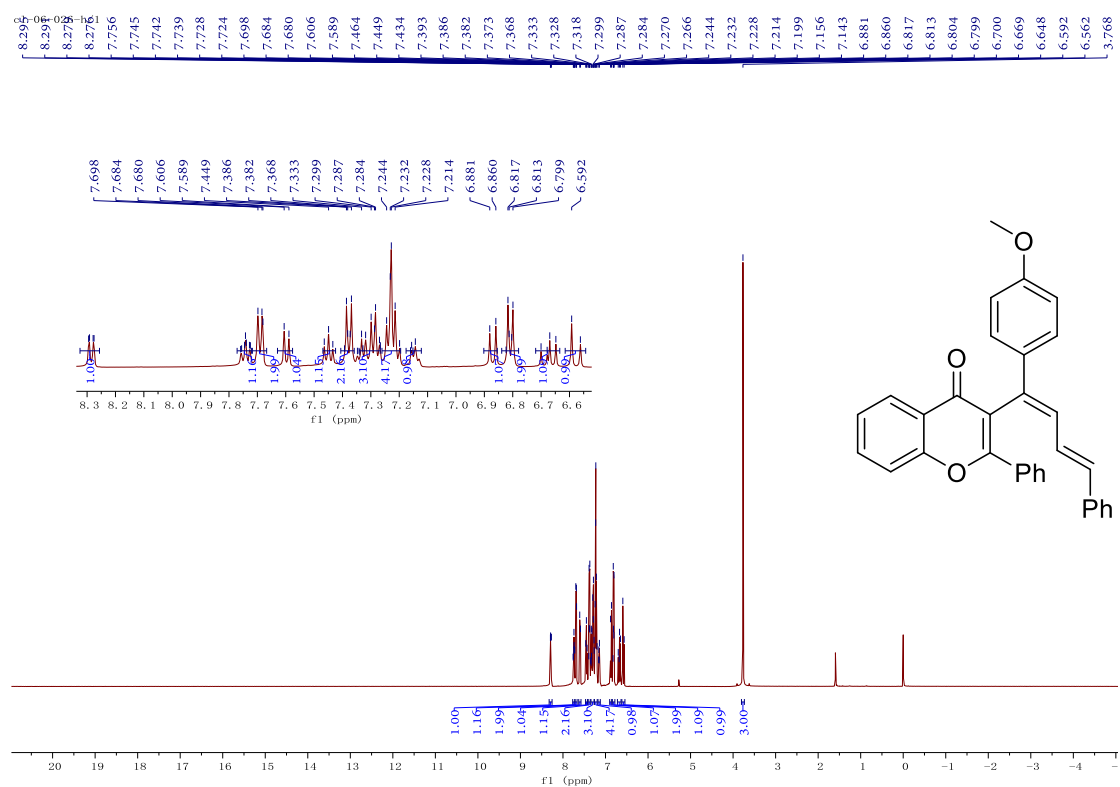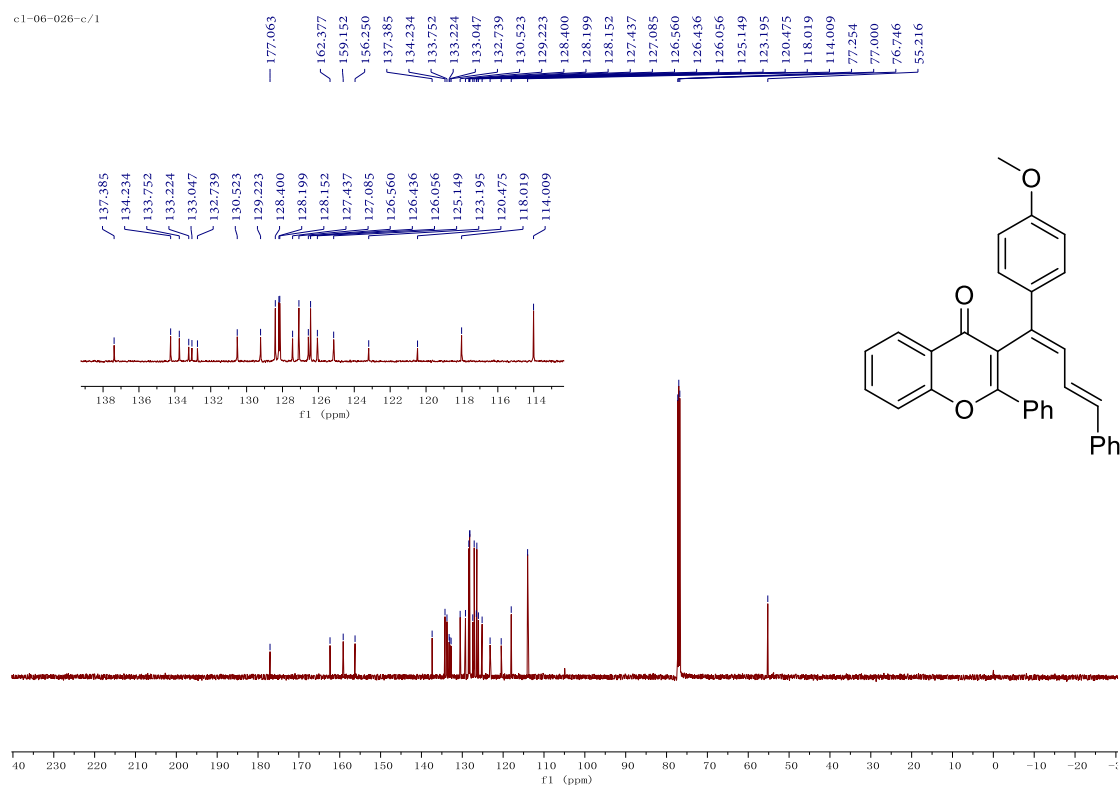

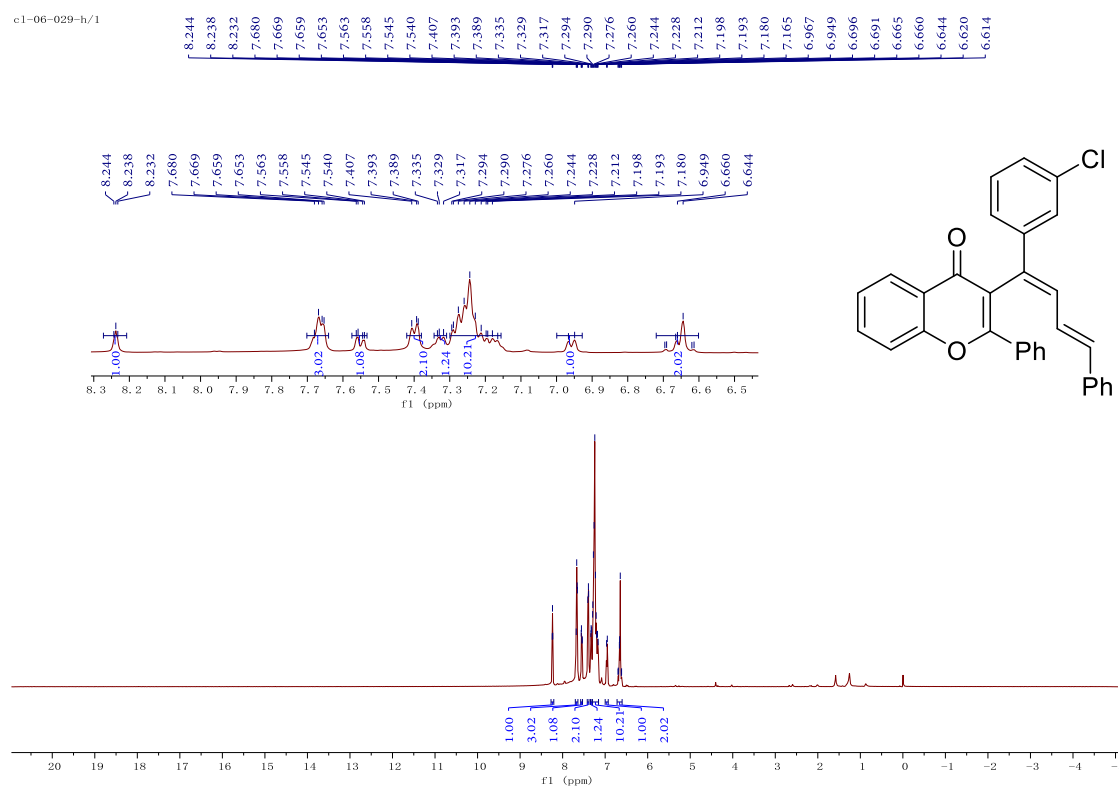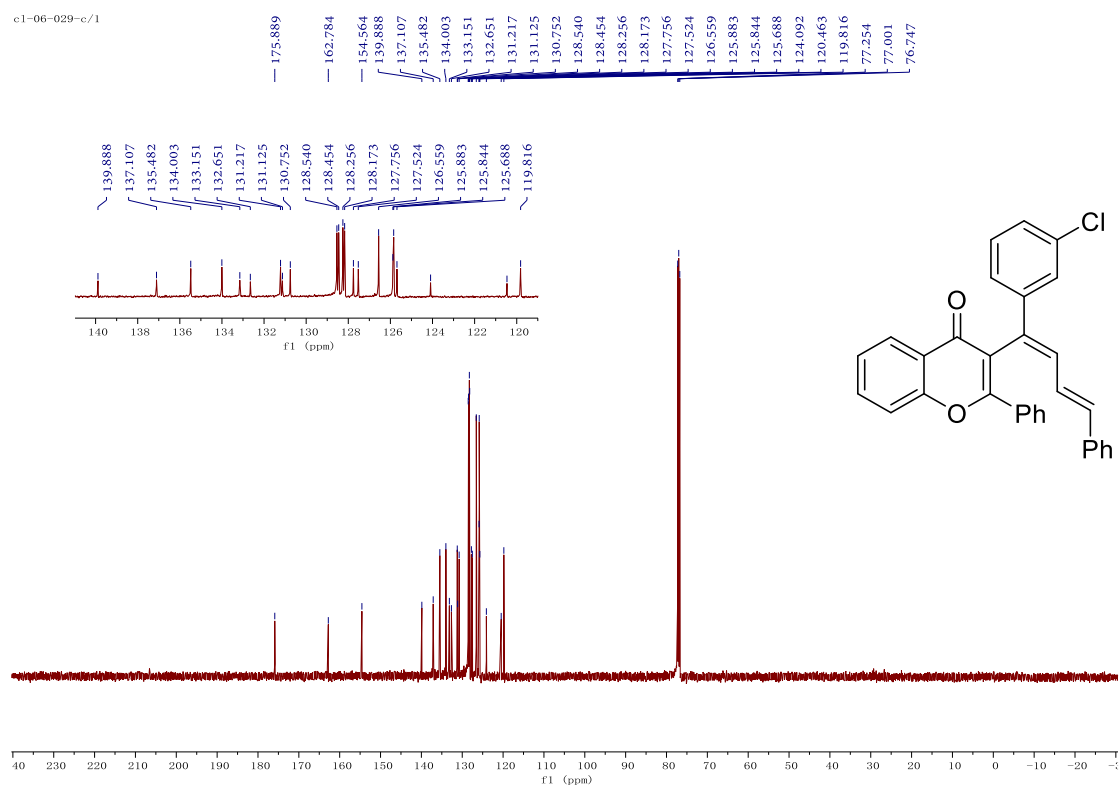

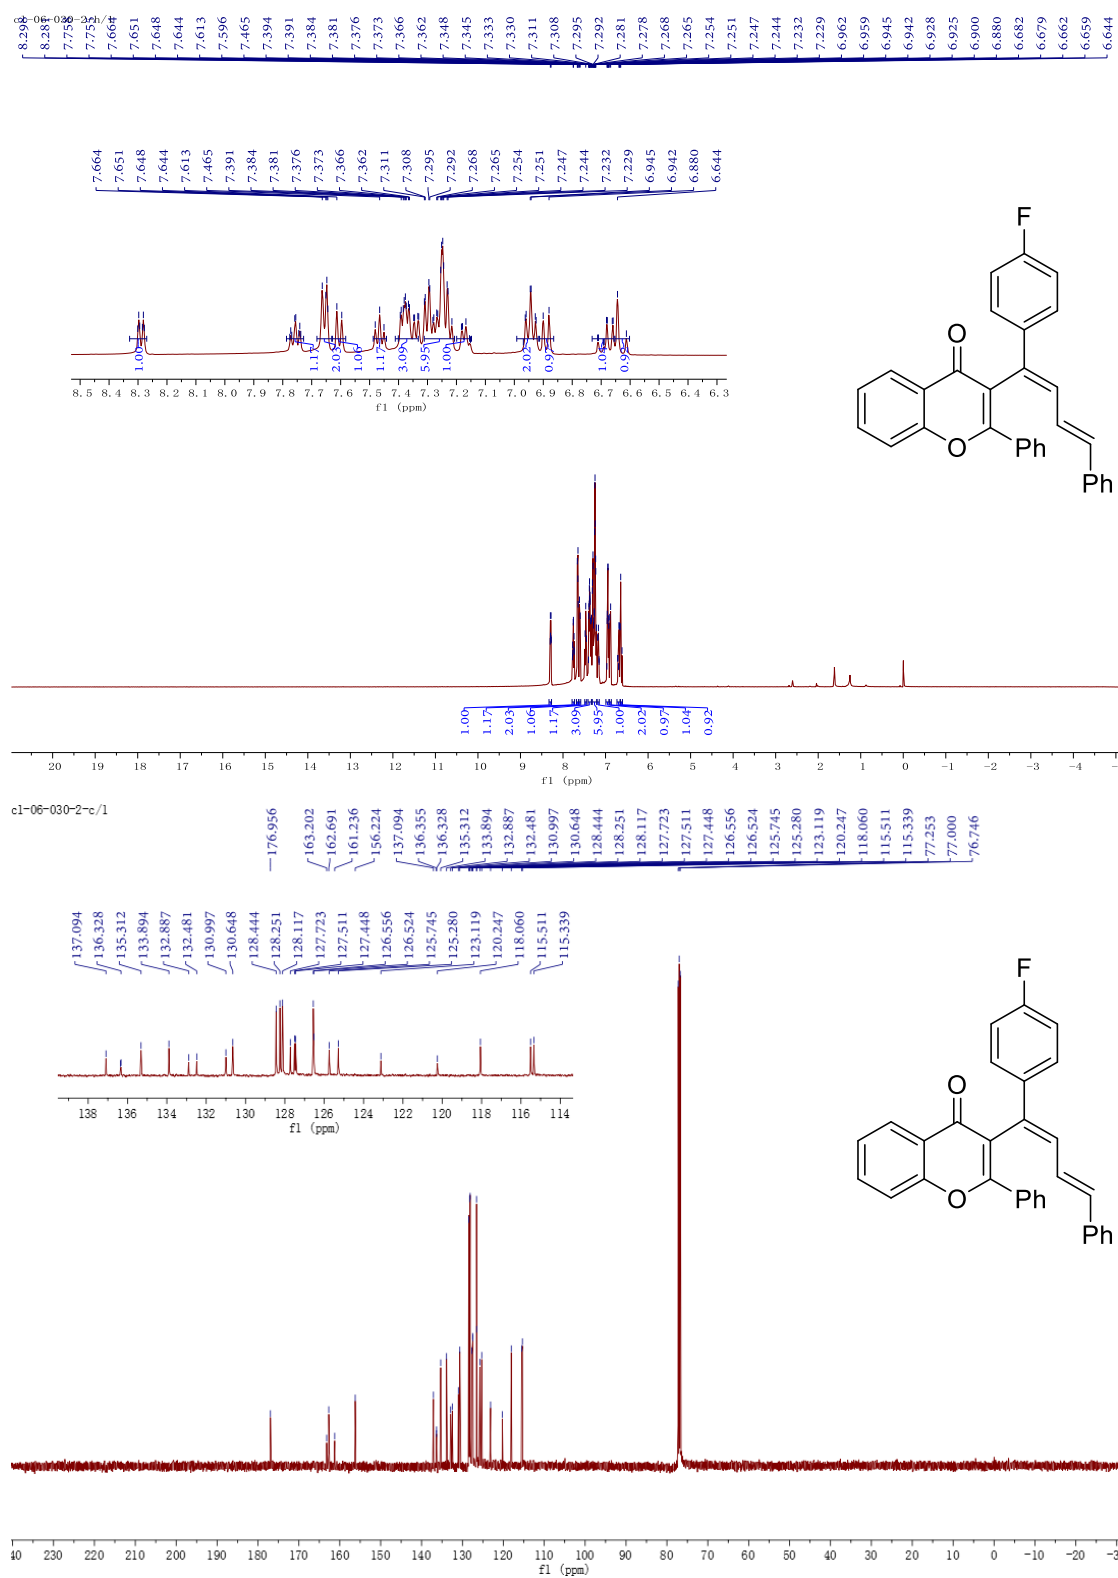

c1-04-069-7-h, 1, f1d

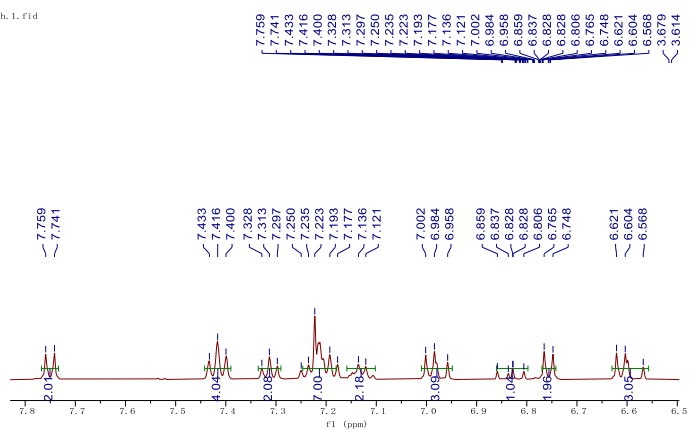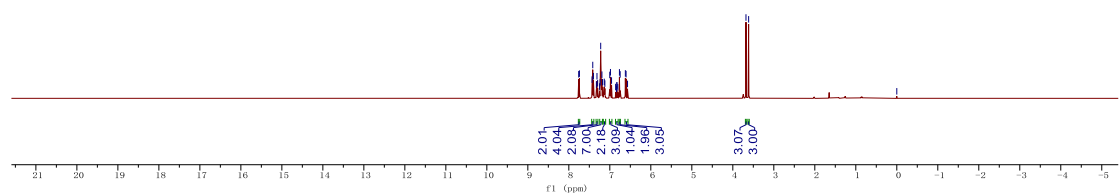

c1-04-069-7-c, 2, f1d

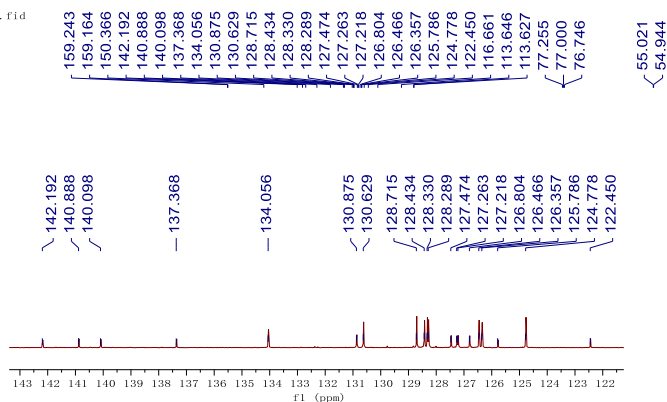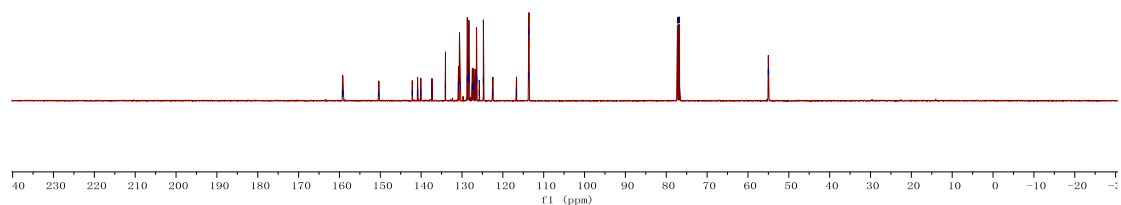

cl-04-070-2-h.1.fid

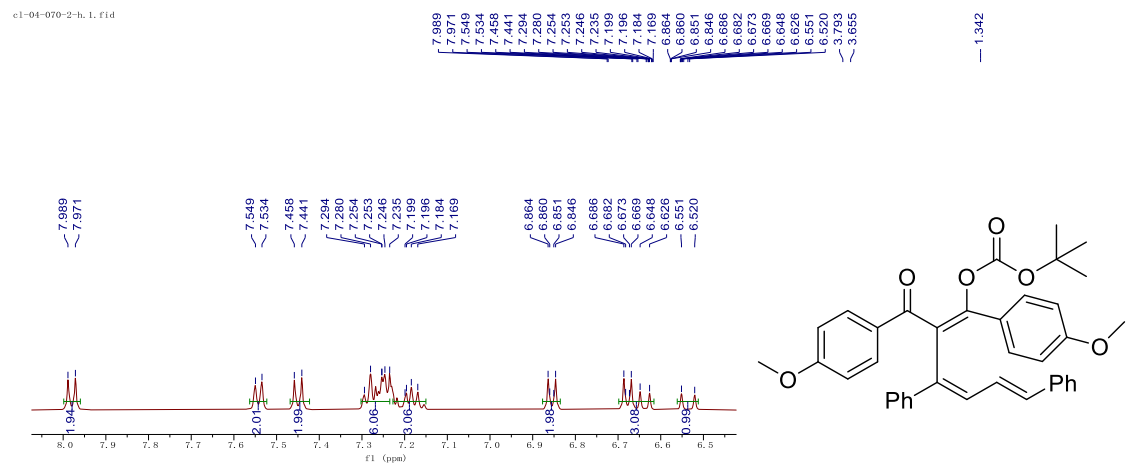

cl-04-070-2-c.1.fid

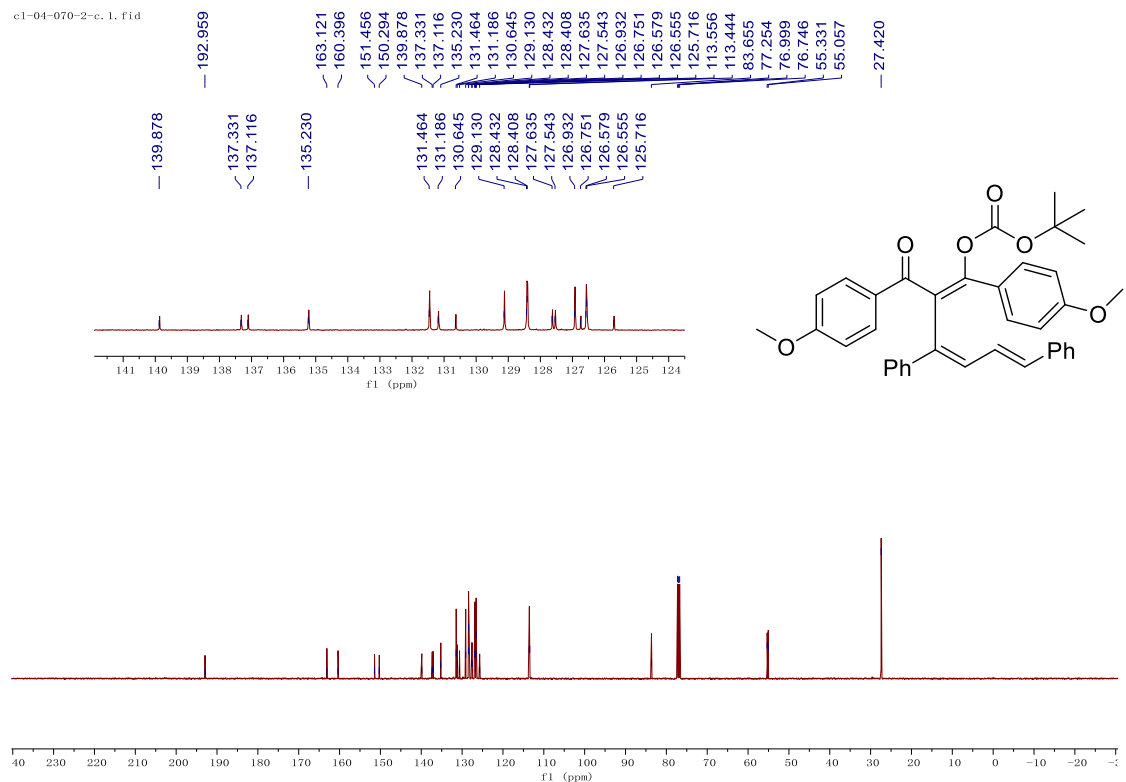

c1-04-074-4-h, 1, f1d

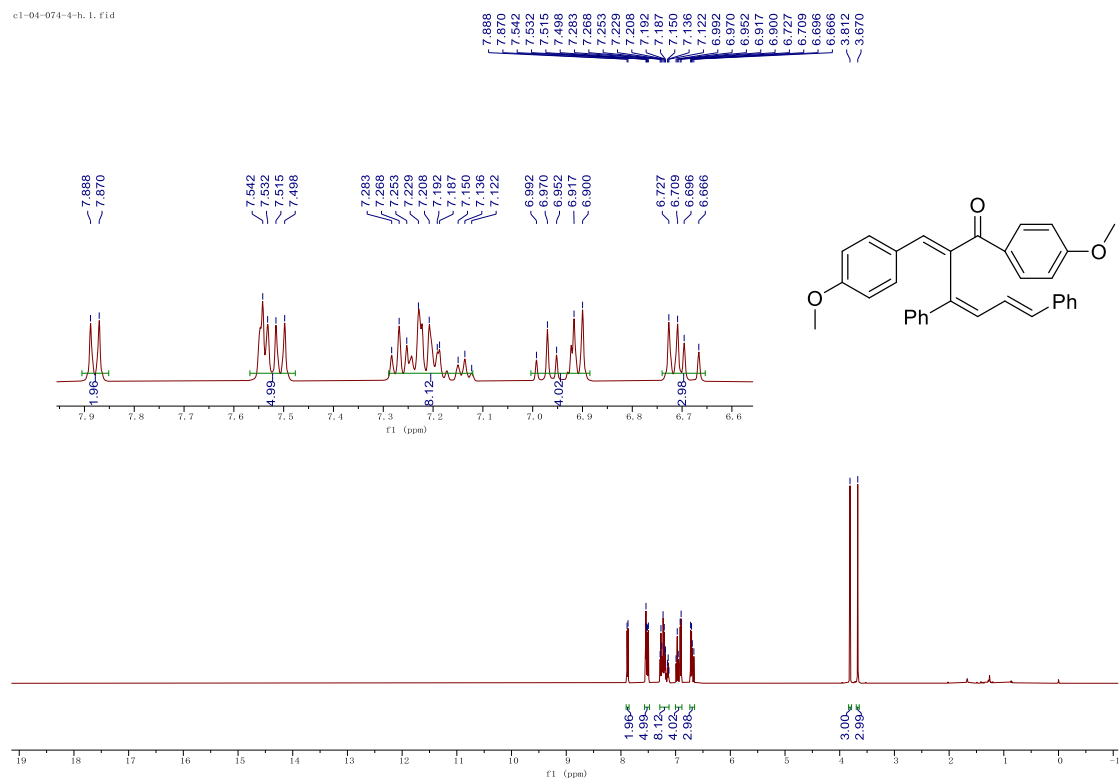

c1-04-074-4-c, 2, f1d

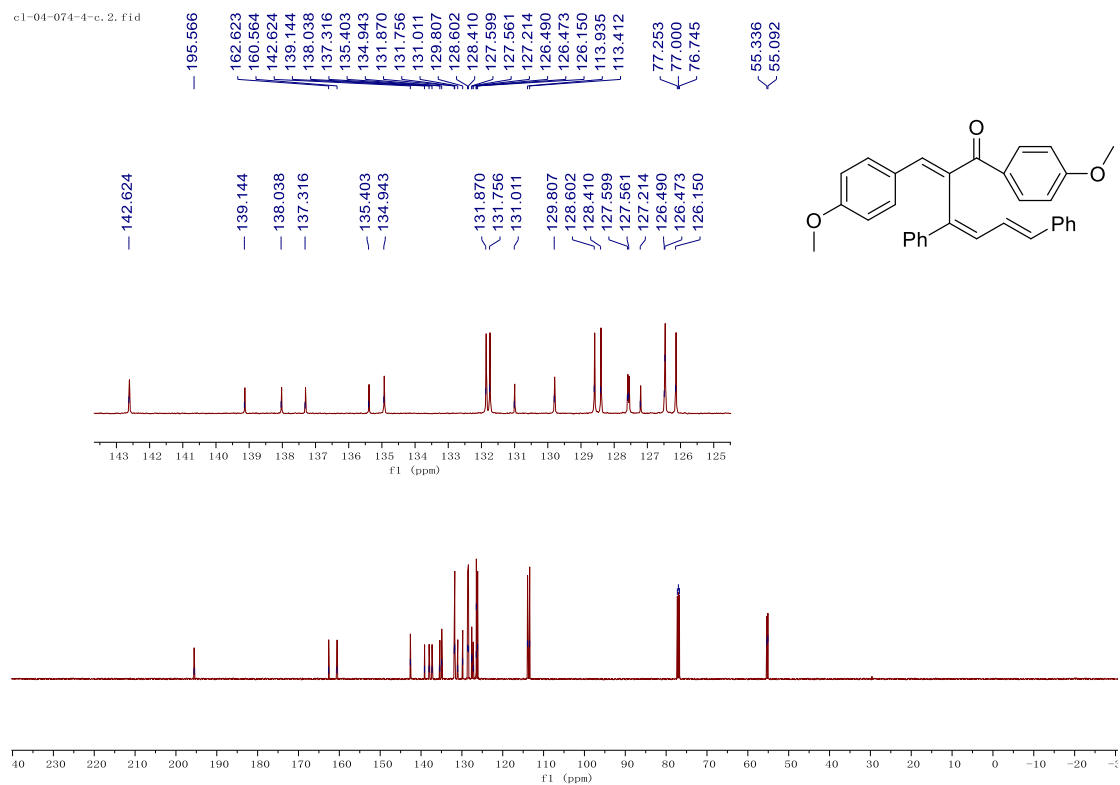

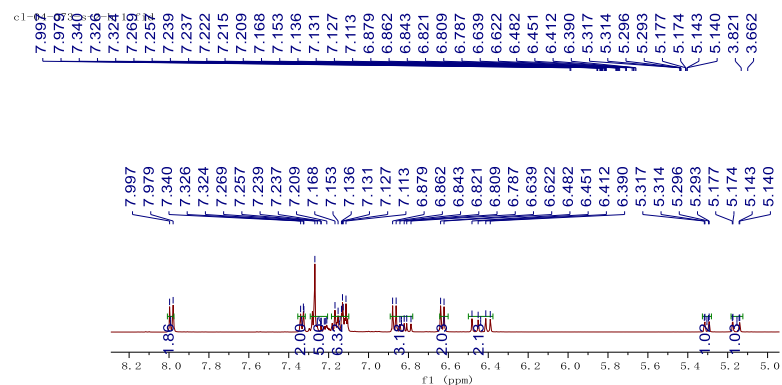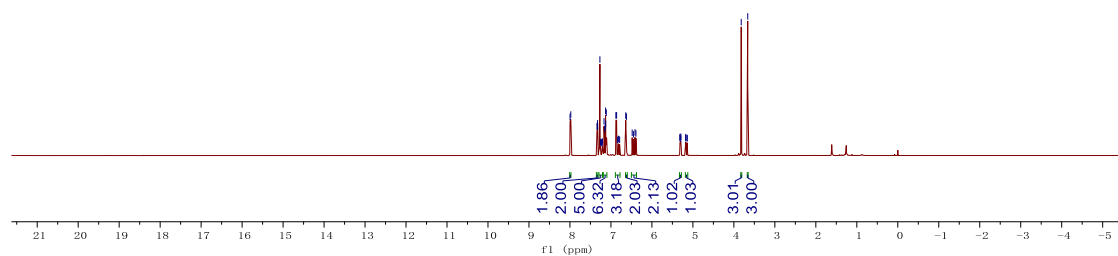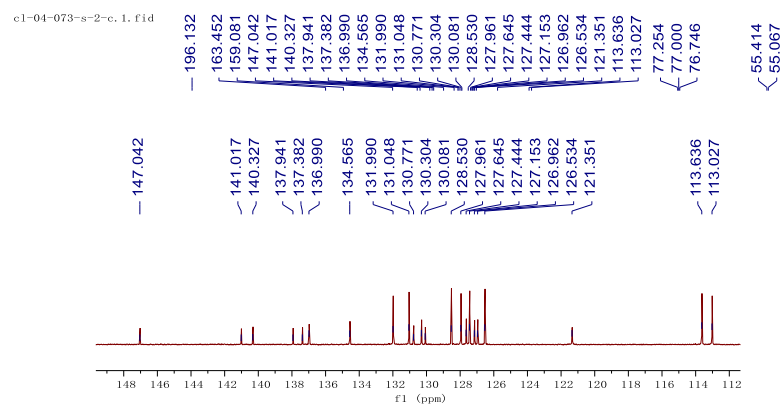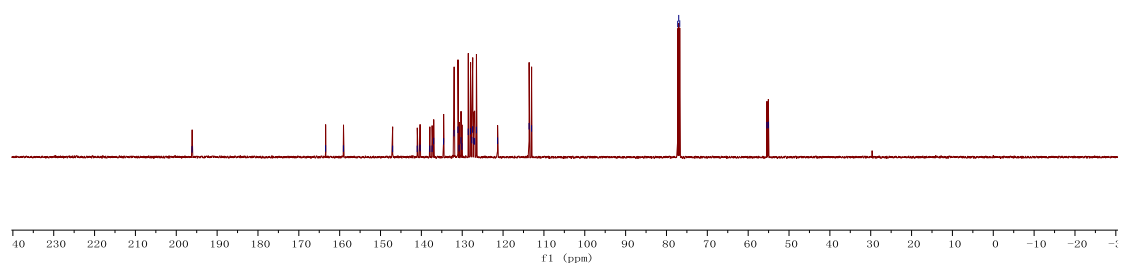

c1-04-073-x-2-h, 1.fid

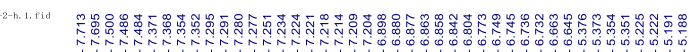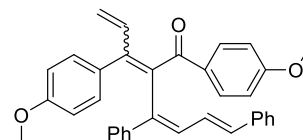

7 (isomer 2)

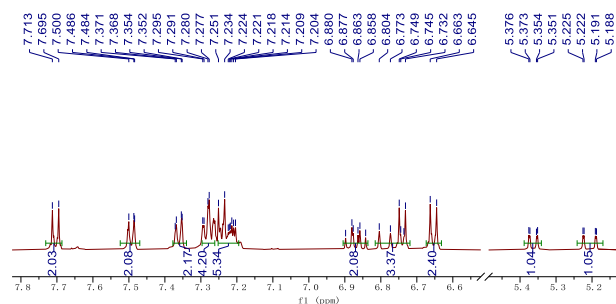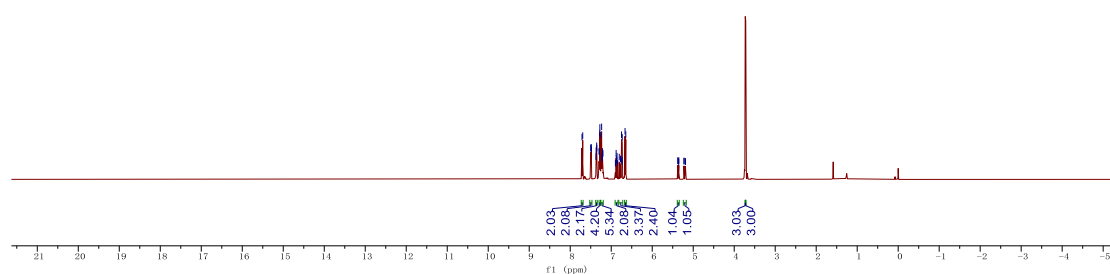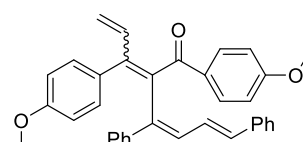

7 (isomer 2)

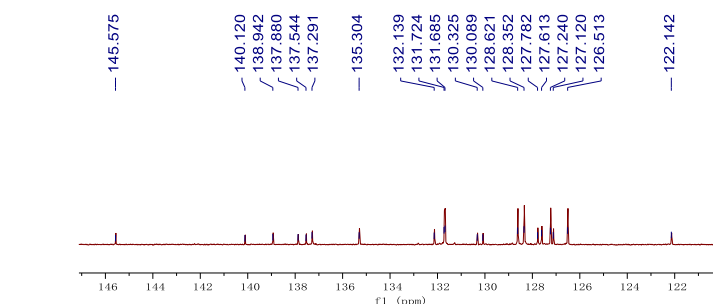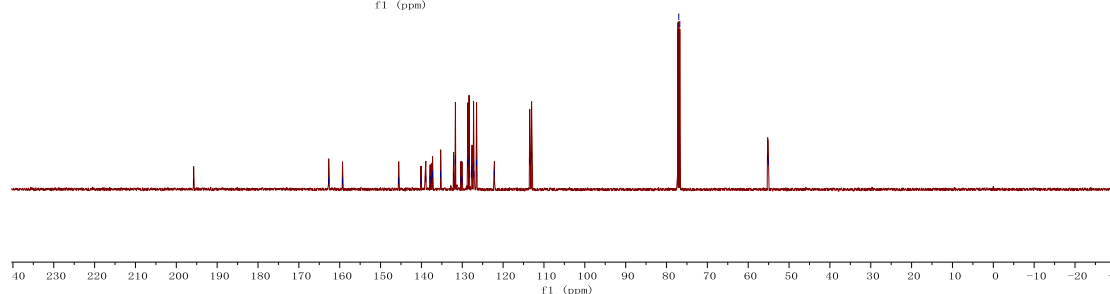

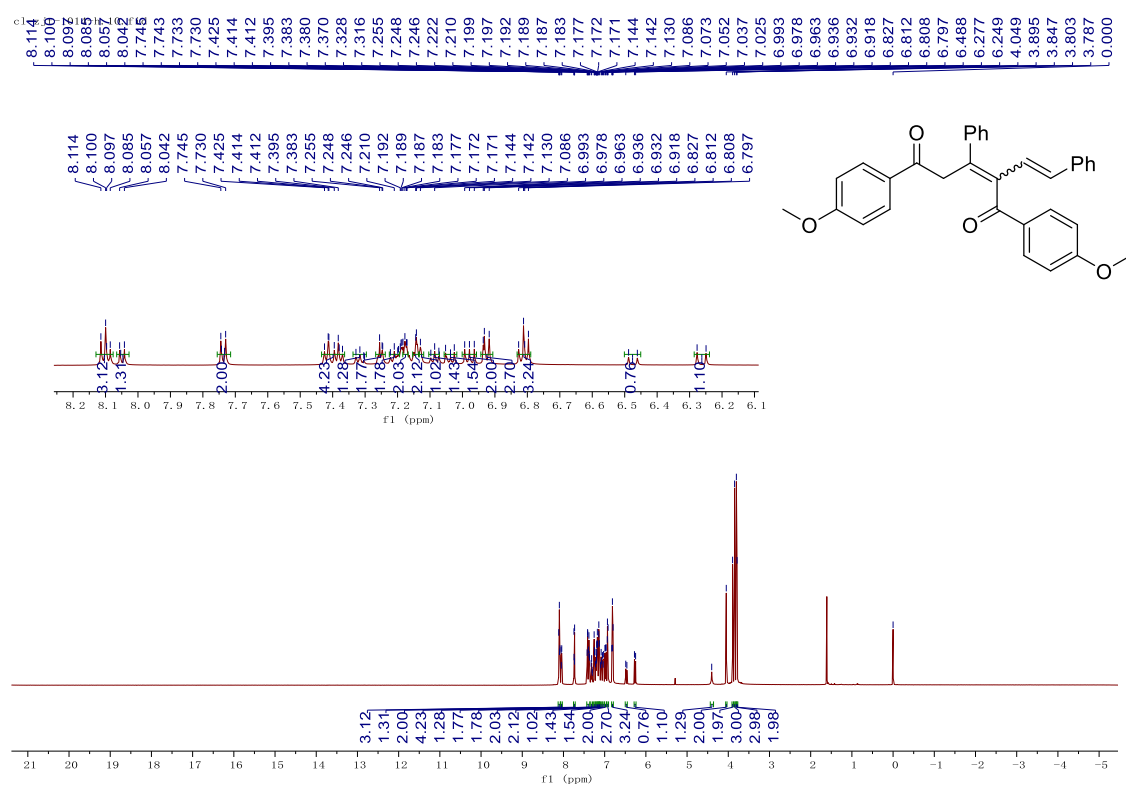

## 7. 1.0 mmol scale reactions for the preparation of 3a

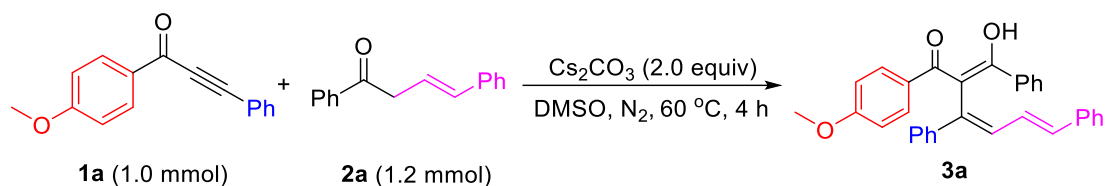

In a schlenk tube 1-(4-methoxyphenyl)-3-phenylprop-2-yn-1-one **1a** (1.0 mmol, 236.3 mg), (*E*)-1,4-diphenylbut-3-en-1-one **2a** (1.2 mmol, 266.7 mg),  $\text{Cs}_2\text{CO}_3$  (2.0 mmol, 651.6 mg) and DMSO (10.0 mL) were stirred at 60 °C. After the reaction was completed as monitored by thin-layer chromatography, the reaction mixture was then quenched by water, and the water layers were extracted with ethyl acetate (10 mL  $\times$  3). The combined organic layers were washed with brine, dried over anhydrous  $\text{Na}_2\text{SO}_4$ , filtered, and concentrated under reduced pressure. Purification by chromatography on silica gel (petroleum ether/ethyl acetate = 12:1) afforded desired compound **3a** (yellow solid, 343.92 mg, 75%).

## 8. X-Ray Crystal Structure of 3I (CCDC: 2156724)

**(2*Z*,3*Z*,5*E*)-3-(3-chlorophenyl)-2-(hydroxy(phenyl)methylene)-1,6-diphenylhexa-3,5-dien-1-one (3I).**

**Sample preparation for crystal growth:** Compound **3I** (50 mg) was dissolved in the mixed solvent of dichloromethane/petroleum ether = 3 ml/6 ml in a 50 mL round-bottom flask. The yellow single crystal of **3I** was obtained by slowly evaporating mixed solvent at room temperature under air.

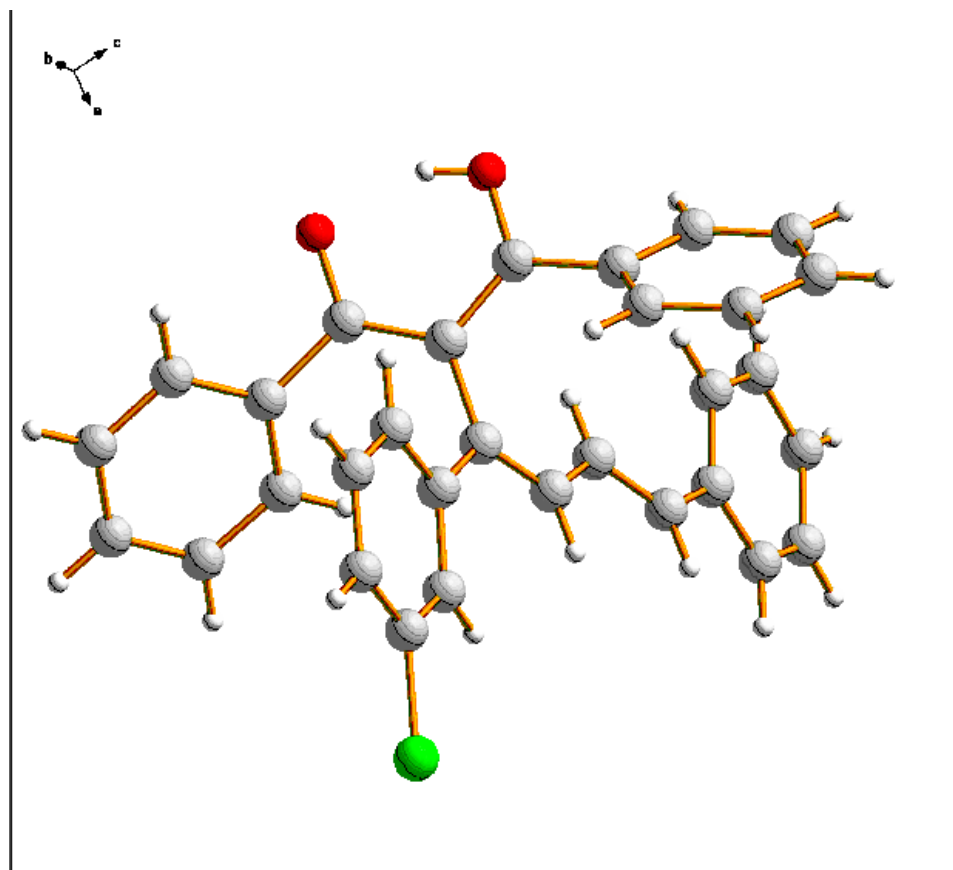

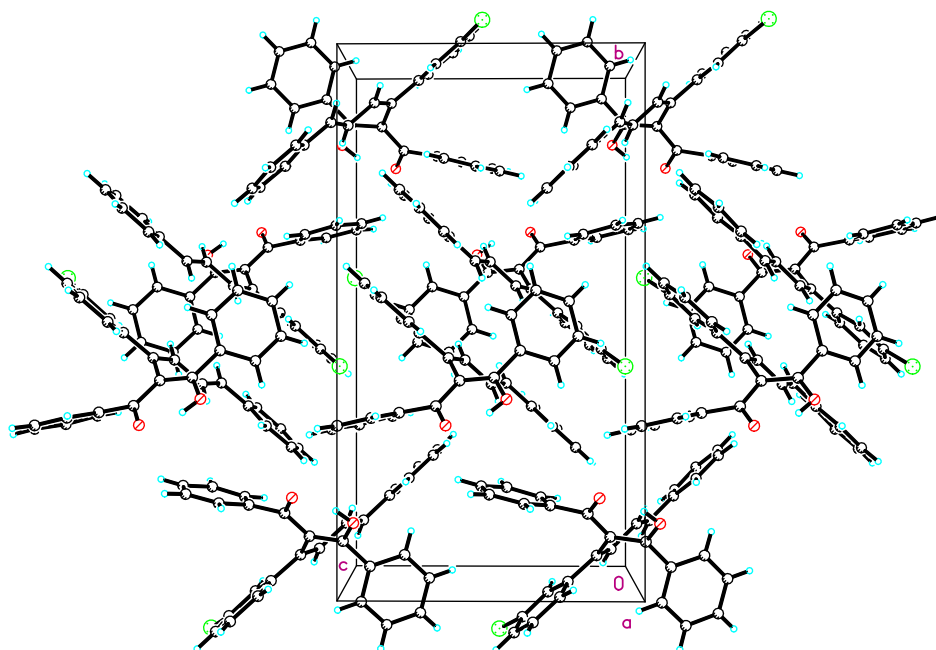

Table 1. Crystal data and structure refinement for **3I**

|                                 |                                                                                                             |
|---------------------------------|-------------------------------------------------------------------------------------------------------------|
| Identification code             | <b>3I</b>                                                                                                   |
| Empirical formula               | C <sub>31</sub> H <sub>23</sub> ClO <sub>2</sub>                                                            |
| Formula weight                  | 462.94                                                                                                      |
| Temperature                     | 213(2) K                                                                                                    |
| Wavelength                      | 0.71073 Å                                                                                                   |
| Crystal system                  | Monoclinic                                                                                                  |
| Space group                     | P 2 <sub>1</sub> /c                                                                                         |
| Unit cell dimensions            | a = 10.4144(4) Å      α = 90°.<br>b = 20.4948(8) Å      β = 91.1890(10)°.<br>c = 11.3123(5) Å      γ = 90°. |
| Volume                          | 2413.99(17) Å <sup>3</sup>                                                                                  |
| Z                               | 4                                                                                                           |
| Density (calculated)            | 1.274 Mg/m <sup>3</sup>                                                                                     |
| Absorption coefficient          | 0.185 mm <sup>-1</sup>                                                                                      |
| F(000)                          | 968                                                                                                         |
| Crystal size                    | 0.20 x 0.15 x 0.100 mm <sup>3</sup>                                                                         |
| Theta range for data collection | 2.682 to 25.998°.                                                                                           |
| Index ranges                    | -12 ≤ h ≤ 12, -25 ≤ k ≤ 25, -13 ≤ l ≤ 13                                                                    |
| Reflections collected           | 32059                                                                                                       |
| Independent reflections         | 4709 [R(int) = 0.0339]                                                                                      |
| Completeness to theta = 25.242° | 99.5 %                                                                                                      |
| Absorption correction           | Semi-empirical from equivalents                                                                             |

|                                   |                                             |
|-----------------------------------|---------------------------------------------|
| Max. and min. transmission        | 0.7456 and 0.6806                           |
| Refinement method                 | Full-matrix least-squares on F <sup>2</sup> |
| Data / restraints / parameters    | 4709 / 0 / 309                              |
| Goodness-of-fit on F <sup>2</sup> | 1.036                                       |
| Final R indices [I>2sigma(I)]     | R1 = 0.0373, wR2 = 0.0896                   |
| R indices (all data)              | R1 = 0.0469, wR2 = 0.0973                   |
| Extinction coefficient            | 0.013(2)                                    |
| Largest diff. peak and hole       | 0.204 and -0.224 e.Å <sup>-3</sup>          |

## 8. X-Ray Crystal Structure of **3y'** (CCDC: 2119670)

### (4''-methoxy-4'-phenyl-[1,1':2',1''-terphenyl]-3'-yl)(4-methoxyphenyl)methanone (**3y'**)

**Sample preparation for crystal growth:** Compound **3y'** (50 mg) was dissolved in the mixed solvent of dichloromethane/petroleum ether = 3 ml/6 ml in a 50 mL round-bottom flask. The white single crystal of **3y'** was obtained by slowly evaporating mixed solvent at room temperature under air.

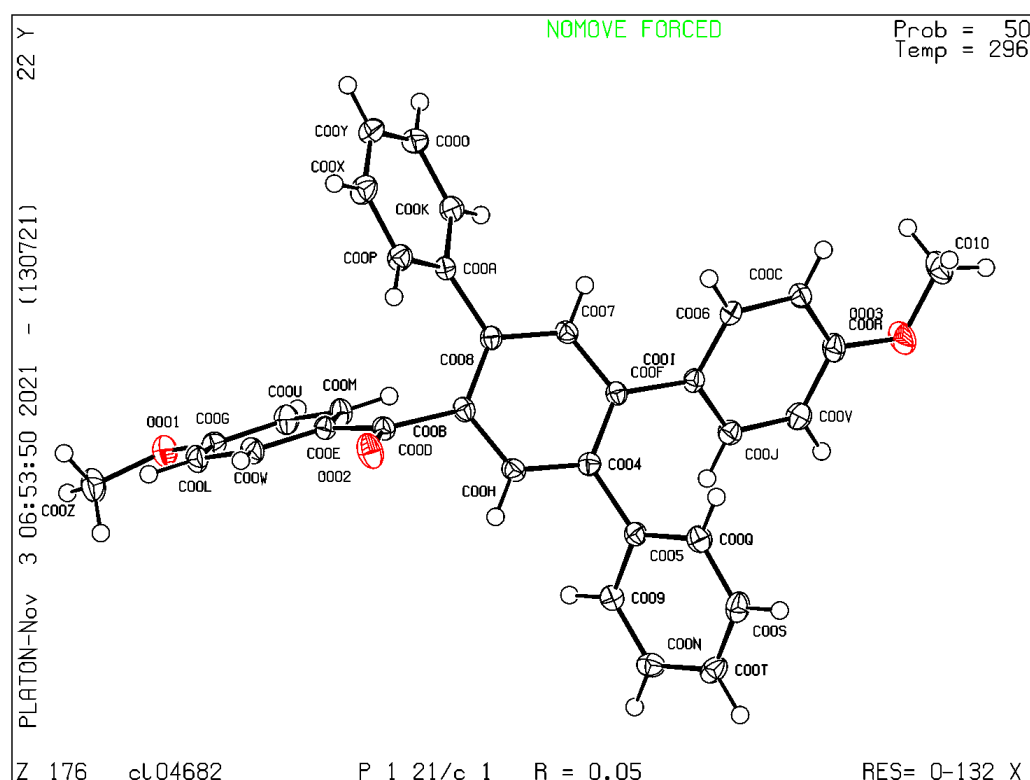

Table 2. Crystal data and structure refinement for **3y'**.

|                     |            |
|---------------------|------------|
| Identification code | <b>3y'</b> |
|---------------------|------------|

|                                 |                                                                                                                                                            |
|---------------------------------|------------------------------------------------------------------------------------------------------------------------------------------------------------|
| Empirical formula               | C <sub>33</sub> H <sub>26</sub> O <sub>3</sub>                                                                                                             |
| Formula weight                  | 470.54                                                                                                                                                     |
| Temperature                     | 296(2) K                                                                                                                                                   |
| Wavelength                      | 0.71073 Å                                                                                                                                                  |
| Space group                     | P 21/c                                                                                                                                                     |
| Unit cell dimensions            | a = 14.2205(8) Å                      α = 90°.<br>b = 9.9027(6) Å                        β = 93.389(2)°.<br>c = 17.0375(12) Å                      γ = 90° |
| Volume                          | 2395.1(3) Å <sup>3</sup>                                                                                                                                   |
| Z                               | 4                                                                                                                                                          |
| Density (calculated)            | 1.305 Mg/m <sup>3</sup>                                                                                                                                    |
| Absorption coefficient          | 0.082 mm <sup>-1</sup>                                                                                                                                     |
| F(000)                          | 992.0                                                                                                                                                      |
| Index ranges                    | -19 ≤ h ≤ 19, -13 ≤ k ≤ 13, -23 ≤ l ≤ 23                                                                                                                   |
| Completeness to theta = 29.975° | 99.7 %                                                                                                                                                     |
| Max. and min. transmission      | 0.746 and 0.698                                                                                                                                            |
| R indices (all data)            | R1 = 0.0475, wR2 = 0.1341                                                                                                                                  |

## 9. X-Ray Crystal Structure of **10** (CCDC: 2122766)

### 1,5-bis(4-methoxyphenyl)-3-phenyl-2-styrylpent-2-ene-1,5-dione (**10**)

**Sample preparation for crystal growth:** Compound **10'** (50 mg) was dissolved in the mixed solvent of dichloromethane/petroleum ether = 3 ml/6 ml in a 50 mL round-bottom flask. The yellow single crystal of **10** was obtained by slowly evaporating mixed solvent at room temperature under air.

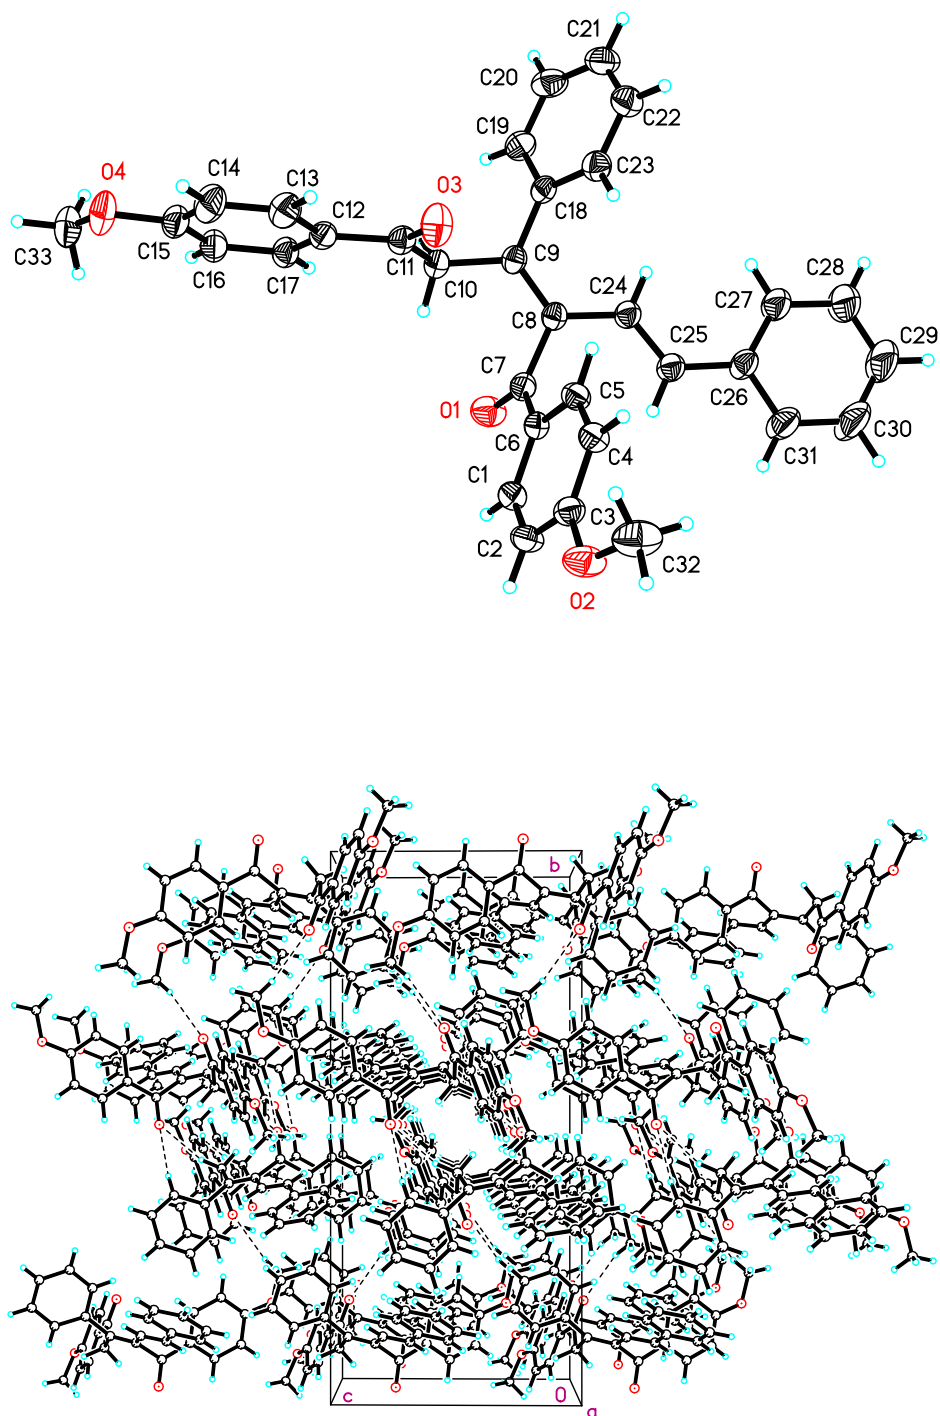

Table 3. Crystal data and structure refinement for **10**

|                     |                   |
|---------------------|-------------------|
| Identification code | <b>10</b>         |
| Empirical formula   | $C_{33}H_{28}O_4$ |
| Formula weight      | 488.55            |

|                                   |                                                                                                                              |
|-----------------------------------|------------------------------------------------------------------------------------------------------------------------------|
| Temperature                       | 293(2) K                                                                                                                     |
| Wavelength                        | 0.71073 Å                                                                                                                    |
| Crystal system                    | Monoclinic                                                                                                                   |
| Space group                       | P 21/c                                                                                                                       |
| Unit cell dimensions              | a = 11.0647(3) Å $\alpha = 90^\circ$<br>b = 23.0493(8) Å $\beta = 92.0670(10)^\circ$<br>c = 10.4440(3) Å $\gamma = 90^\circ$ |
| Volume                            | 2661.84(14) Å <sup>3</sup>                                                                                                   |
| Z                                 | 4                                                                                                                            |
| Density (calculated)              | 1.219 Mg/m <sup>3</sup>                                                                                                      |
| Absorption coefficient            | 0.079 mm <sup>-1</sup>                                                                                                       |
| F(000)                            | 1032                                                                                                                         |
| Crystal size                      | 0.200 x 0.150 x 0.120 mm <sup>3</sup>                                                                                        |
| Theta range for data collection   | 2.553 to 25.999°.                                                                                                            |
| Index ranges                      | -12 ≤ h ≤ 13, -28 ≤ k ≤ 28, -12 ≤ l ≤ 12                                                                                     |
| Reflections collected             | 27068                                                                                                                        |
| Independent reflections           | 5218 [R(int) = 0.0668]                                                                                                       |
| Completeness to theta = 25.242°   | 99.6 %                                                                                                                       |
| Absorption correction             | Semi-empirical from equivalents                                                                                              |
| Max. and min. transmission        | 0.7456 and 0.5367                                                                                                            |
| Refinement method                 | Full-matrix least-squares on F <sup>2</sup>                                                                                  |
| Data / restraints / parameters    | 5218 / 0 / 337                                                                                                               |
| Goodness-of-fit on F <sup>2</sup> | 1.025                                                                                                                        |
| Final R indices [I > 2σ(I)]       | R1 = 0.0474, wR2 = 0.1142                                                                                                    |
| R indices (all data)              | R1 = 0.0728, wR2 = 0.1331                                                                                                    |
| Extinction coefficient            | 0.018(3)                                                                                                                     |
| Largest diff. peak and hole       | 0.135 and -0.190 e.Å <sup>-3</sup>                                                                                           |
